# Supplementary material for: The unfolded protein sensor IRE1a is essential for homeostatic dendritic cell maturation
Source: Research Square preprint supplement (doi:10.21203/rs.3.rs-4763670/v1), 2024-08-06
Supplement: Supplementary file 1 [file 1ece261c55a2226436c6fc7b.xlsx]

## Sheet: cDC1.Xbp1KO-cDC1.WT
logFC	AveExpr	t	P.Value	adj.P.Val	B	miRNAname	gene
2.44859	1.32969	3.16618	0.00439211	0.0929938	-2.42983	mmu-miR-690	MIMAT0003469
2.42983	1.57023	3.64609	0.00138547	0.0436886	-1.82522	mmu-miR-3963	MIMAT0019341
2.05166	1.23616	3.00149	0.00646812	0.113312	-2.77705	mmu-miR-3066-5p	MIMAT0014838
1.50407	4.89791	3.48534	0.00204629	0.051121	-1.33872	mmu-miR-34a-5p	MIMAT0000542
1.35934	6.78285	4.93234	5.84934e-05	0.00461123	1.84436	mmu-miR-18a-3p	MIMAT0004626
0.78886	15.5136	7.08094	3.69938e-07	0.000174981	6.54007	mmu-miR-92a-3p	MIMAT0000539
0.725678	7.80667	3.11292	0.00498082	0.0942372	-2.15326	mmu-miR-128-3p	MIMAT0000140
0.693635	5.91218	2.86663	0.00884113	0.139395	-2.51798	mmu-miR-17-3p	MIMAT0000650
0.666792	7.77861	3.20052	0.00404883	0.0911952	-1.94495	mmu-miR-92a-1-5p	MIMAT0017066
0.659068	17.9355	5.83301	6.60524e-06	0.00104143	3.4788	mmu-let-7f-5p	MIMAT0000525
0.615395	9.21713	4.63757	0.000120805	0.00634899	1.21762	mmu-miR-130b-5p	MIMAT0004583
0.590133	11.0398	3.48389	0.00205349	0.051121	-1.58444	mmu-let-7d-3p	MIMAT0000384
-0.853879	12.6274	-5.3737	1.99243e-05	0.00216523	2.79954	mmu-miR-148a-3p	MIMAT0000516
-0.900253	10.9401	-5.31654	2.28883e-05	0.00216523	2.74904	mmu-miR-182-5p	MIMAT0000211
-1.04003	9.91811	-4.09025	0.000466281	0.0200501	-0.0779516	mmu-miR-10b-5p	MIMAT0000208
-1.55959	5.5965	-4.71943	9.87335e-05	0.00583762	1.1006	mmu-miR-183-5p	MIMAT0000212
-1.61768	7.4754	-6.50991	1.35129e-06	0.000319581	5.19485	mmu-miR-155-5p	MIMAT0000165
-1.94112	4.62013	-3.94007	0.000674782	0.0265976	-0.708809	mmu-miR-451a	MIMAT0001632
-2.62566	2.39802	-2.97528	0.00687545	0.116146	-2.90602	mmu-miR-144-5p	MIMAT0016988
-2.63685	0.689409	-3.13586	0.0047185	0.0929938	-2.71436	mmu-miR-7656-3p	MIMAT0029819
-2.65965	0.836694	-3.82567	0.000893477	0.0325088	-1.93007	mmu-miR-455-3p	MIMAT0003742
-2.67193	1.1555	-3.55349	0.00173507	0.051121	-2.21081	mmu-miR-592-5p	MIMAT0003730
-2.77163	2.55959	-3.52671	0.0018514	0.051121	-2.2391	mmu-miR-7a-5p	MIMAT0000677
-2.8406	3.31177	-3.32976	0.00297525	0.0703646	-2.44677	mmu-miR-187-5p	MIMAT0016997
-2.94096	1.95393	-3.08805	0.00528112	0.0960757	-2.75162	mmu-miR-7060-3p	MIMAT0028025

## Sheet: cDC1.Ire1KO-cDC1.WT
logFC	AveExpr	t	P.Value	adj.P.Val	B	miRNAname	gene
3.29007	0.523632	4.67104	0.000111237	0.00560275	0.495264	mmu-miR-6935-3p	MIMAT0027771
2.57251	1.23702	2.78258	0.0107181	0.126741	-2.7246	mmu-miR-3062-5p	MIMAT0014830
2.15387	1.09815	2.83498	0.00950798	0.119765	-2.6453	mmu-miR-195a-3p	MIMAT0017000
1.67403	6.00468	3.31224	0.00310267	0.0587026	-1.79485	mmu-miR-682	MIMAT0003459
1.58576	5.87049	3.06721	0.00554603	0.0971581	-2.2666	mmu-miR-692	MIMAT0003471
1.55362	4.24731	2.87806	0.00861141	0.116377	-2.4895	mmu-miR-872-3p	MIMAT0004935
1.40675	8.2734	3.5593	0.0017108	0.0449561	-1.4539	mmu-miR-703	MIMAT0003493
1.38187	8.25225	3.03699	0.00595308	0.100564	-2.64712	mmu-miR-8094	MIMAT0031395
1.28581	6.78285	4.16516	0.000387647	0.0144703	0.129823	mmu-miR-18a-3p	MIMAT0004626
1.16104	7.77861	5.29147	2.43259e-05	0.0025141	2.68781	mmu-miR-92a-1-5p	MIMAT0017066
1.08145	4.8522	2.90818	0.00803321	0.111756	-2.4665	mmu-miR-27b-5p	MIMAT0004522
0.845182	15.5136	7.00652	4.36948e-07	0.000103338	6.09941	mmu-miR-92a-3p	MIMAT0000539
0.841478	9.07405	5.02861	4.61974e-05	0.0036419	1.97433	mmu-miR-181d-5p	MIMAT0004324
0.804932	8.07064	4.15478	0.000397704	0.0144703	-0.0227166	mmu-miR-301b-3p	MIMAT0004186
0.793431	5.91218	2.91383	0.00792895	0.111756	-2.55627	mmu-miR-17-3p	MIMAT0000650
0.679319	9.21713	4.70171	0.000103139	0.00560275	1.19641	mmu-miR-130b-5p	MIMAT0004583
0.677411	7.8888	3.60647	0.00152566	0.0424493	-1.28413	mmu-miR-6539	MIMAT0025584
0.637595	8.97588	3.7014	0.00121074	0.0357926	-1.1654	mmu-miR-320-3p	MIMAT0000666
0.61847	13.0692	3.84096	0.000860606	0.0290762	-1.2465	mmu-miR-222-3p	MIMAT0000670
0.51524	9.4346	2.86168	0.0089425	0.117495	-3.10897	mmu-miR-130b-3p	MIMAT0000387
-0.581161	11.9295	-4.74727	9.21923e-05	0.00560275	1.09607	mmu-miR-146a-5p	MIMAT0000158
-0.626935	10.9401	-3.46662	0.00214095	0.0506336	-1.89387	mmu-miR-182-5p	MIMAT0000211
-0.761838	12.6274	-4.43554	0.000198881	0.00855189	0.266062	mmu-miR-148a-3p	MIMAT0000516
-0.80015	14.517	-7.98899	5.14788e-08	2.43495e-05	8.39041	mmu-miR-22-3p	MIMAT0000531
-0.892609	10.9948	-5.2551	2.65761e-05	0.0025141	2.41967	mmu-miR-101a-3p	MIMAT0000133
-0.922042	5.79727	-2.95306	0.00723983	0.110466	-2.4095	mmu-miR-194-5p	MIMAT0000224
-1.03945	9.91811	-3.71329	0.00117612	0.0357926	-1.19606	mmu-miR-10b-5p	MIMAT0000208
-1.33138	5.5965	-3.42573	0.00236279	0.053219	-1.4128	mmu-miR-183-5p	MIMAT0000212
-1.33665	12.7791	-3.37938	0.00264148	0.0534847	-2.22956	mmu-miR-138-5p	MIMAT0000150
-1.67416	7.4754	-5.63114	1.07047e-05	0.00168778	3.49526	mmu-miR-155-5p	MIMAT0000165
-1.94601	4.62013	-3.16832	0.00436989	0.0794984	-1.94044	mmu-miR-451a	MIMAT0001632
-2.11337	1.1555	-2.81549	0.00994202	0.120579	-2.67078	mmu-miR-592-5p	MIMAT0003730
-2.34141	1.90174	-3.38993	0.00257535	0.0534847	-1.71901	mmu-miR-7a-1-3p	MIMAT0004670
-2.61582	2.84245	-2.82979	0.00962171	0.119765	-2.6226	mmu-miR-9-5p	MIMAT0000142
-2.71886	5.06351	-3.36813	0.00271381	0.0534847	-1.53623	mmu-miR-155-3p	MIMAT0016993

## Sheet: cDC1.Ire1KO-cDC1.Xbp1KO
logFC	AveExpr	t	P.Value	adj.P.Val	B	miRNAname	gene
3.15071	0.523632	3.78786	0.000980143	0.05351	-3.65914	mmu-miR-6935-3p	MIMAT0027771
3.09778	3.31177	3.31699	0.00306763	0.0853523	-3.77532	mmu-miR-187-5p	MIMAT0016997
2.99639	1.06365	3.18589	0.00419184	0.110152	-3.89816	mmu-miR-5133	MIMAT0020644
2.18807	6.00468	3.47282	0.00210911	0.0712578	-2.18153	mmu-miR-682	MIMAT0003459
0.801952	9.07405	4.29467	0.000281602	0.0331825	0.0255419	mmu-miR-181d-5p	MIMAT0004324
0.768253	8.07064	3.563	0.00169552	0.0617229	-1.44783	mmu-miR-301b-3p	MIMAT0004186
0.641159	7.8888	3.06961	0.00551482	0.127663	-2.2878	mmu-miR-6539	MIMAT0025584
0.591858	11.6193	3.96855	0.000629155	0.0495984	-0.316643	mmu-miR-181b-5p	MIMAT0000673
0.561725	10.9033	3.7292	0.00113129	0.05351	-0.840373	mmu-miR-301a-3p	MIMAT0000379
0.534553	16.974	4.75782	8.98291e-05	0.0212446	1.48511	mmu-miR-181a-5p	MIMAT0000210
0.523791	11.5789	3.56279	0.0016964	0.0617229	-1.1419	mmu-miR-103-3p	MIMAT0000546
-0.537812	8.92664	-2.99005	0.00664287	0.142822	-2.35168	mmu-miR-15a-5p	MIMAT0000526
-0.569298	15.0148	-4.36211	0.00023841	0.0331825	0.62138	mmu-miR-142a-5p	MIMAT0000154
-0.644446	10.1406	-3.77199	0.00101896	0.05351	-0.838541	mmu-miR-29a-3p	MIMAT0000535
-0.684905	17.9355	-5.06056	4.27233e-05	0.0202081	2.17645	mmu-let-7f-5p	MIMAT0000525
-0.78678	10.9948	-4.20569	0.000350767	0.0331825	0.0721865	mmu-miR-101a-3p	MIMAT0000133
-1.01121	7.64472	-3.15669	0.00449182	0.111823	-2.27981	mmu-miR-676-5p	MIMAT0003781
-2.23479	3.13953	-3.38908	0.00258062	0.0813756	-3.58847	mmu-miR-33-5p	MIMAT0000667
