# Supplementary material for: The unfolded protein sensor IRE1a is essential for homeostatic dendritic cell maturation
Source: Research Square preprint supplement (doi:10.21203/rs.3.rs-4763670/v1), 2024-08-06
Supplement: Supplementary file 2 [file 274ab6a684f4f23ba71fddab.xlsx]

## Sheet: XBP1-target genes
DE genes	x	y	angle	r			Non-DE genes	x	y	angle	r			Non-Exp genes
Ddit3	-3.06297	1.70147	2.63454	3.50382			Edem2	0.90652	-0.0671883	-0.0739815	0.909007			Elovl2
Erp44	1.18984	2.37036	1.10558	2.65223			Impdh1	-0.906598	0.0127765	3.1275	0.906688			Selenos
Rpn1	1.09817	2.00534	1.06978	2.28634			Pdia6	-0.431866	0.796115	2.06784	0.905708			Hdldp
Slc2a6	1.96925	0.768378	0.372019	2.11385			Stt3a	0.839175	0.226068	0.263146	0.869092			Hist1h2ad
Entpd7	1.58207	1.37315	0.714821	2.09487			Ppp1r10	0.275262	-0.794885	-1.23743	0.841196			Srp54b
Dnajb11	0.183624	1.88836	1.47386	1.89727			Pecr	-0.803074	-0.0774458	-3.04545	0.8068			Tipf5
Creb3l2	1.76404	-0.447488	-0.248432	1.81991			Uba5	0.622973	0.511805	0.687745	0.806251			Tme3
Tmem39a	1.52477	-0.601554	-0.375773	1.63915			Alg12	0.127892	0.793396	1.41098	0.803638
Txndc5	1.01554	1.07932	0.815833	1.48198			Apba3	0.123429	0.781677	1.41419	0.791362
Dnajc10	0.989416	1.01412	0.797728	1.41682			Slc30a5	0.595676	0.51696	0.714769	0.788719
Eif2ak3	1.18555	0.680458	0.521052	1.36695			Cdk5rap3	0.708924	0.303357	0.404334	0.771102
P4hb	0.743022	1.08245	0.96924	1.31293			Bet1	0.747623	0.132826	0.17583	0.75933
Txndc11	1.22006	0.10244	0.0837662	1.22436			Selm	0.307598	0.690553	1.15174	0.755963
Sec24d	1.10715	0.341122	0.298879	1.15851			Ssr2	0.709884	0.127493	0.177702	0.721242
Creld2	0.524507	1.02892	1.09937	1.1549			Ggcx	0.696789	0.142712	0.20202	0.711254
Dnpep	0.596439	0.966476	1.01788	1.1357			Spcs2	0.596159	0.385291	0.573762	0.709827
Dnajb9	0.977463	-0.505986	-0.47767	1.10066			Pla2g6	0.315876	0.620627	1.1	0.696387
Pdia3	-0.45085	0.997107	1.99544	1.0943			Slc30a7	0.484541	-0.494098	-0.795164	0.692035
Edem1	0.827806	0.581862	0.612667	1.01184			Hmbox1	-0.68233	-0.0586021	-3.05592	0.684842
Sec61a1	0.954208	0.169467	0.175767	0.96914			Nbr1	-0.0562189	-0.6797	-1.65332	0.682021
							Yipf2	0.637353	-0.146969	-0.226631	0.654078
							Isg20	-0.111036	0.644476	1.74141	0.653971
							Cd68	0.626387	-0.165113	-0.257734	0.647783
							Arf4	0.588395	-0.261867	-0.418732	0.644037
							Lman2	0.581454	0.239055	0.390068	0.628678
							Dad1	0.582972	0.220485	0.361581	0.623273
							Cdk2ap2	0.292812	0.546034	1.07857	0.61959
							Ssr3	0.501303	0.315804	0.562162	0.592483
							Oat	0.566501	0.0725209	0.127323	0.571124
							Sec13	0.204159	0.526336	1.20078	0.564544
							Pgm3	0.550059	-0.0201339	-0.0365868	0.550428
							Fkbp2	0.0412823	0.545699	1.49529	0.547259
							Gabarap	0.532846	0.122579	0.226112	0.546764
							Ero1lb	0.210927	-0.500979	-1.17229	0.543572
							H13	0.340977	-0.406112	-0.872363	0.530275
							Herpud1	-0.52173	-0.0768401	-2.99536	0.527358
							Copa	0.472279	-0.230291	-0.453692	0.525435
							Mbnl2	-0.00921128	-0.522205	-1.58843	0.522287
							Bet1l	0.518729	0.0561002	0.107731	0.521754
							Pde4dip	-0.4918	-0.107894	-2.92563	0.503496
							Sec23b	0.467779	-0.138115	-0.287101	0.487743
							Ift20	-0.0411382	0.481826	1.65597	0.483579
							Polr3k	-0.0578461	0.47704	1.69147	0.480534
							Zfand2a	-0.45113	0.0868914	2.95131	0.459422
							Tmem167b	-0.212118	-0.37775	-2.08245	0.433231
							Sar1a	0.424671	0.0355385	0.0834901	0.426156
							Derl1	0.253158	0.338613	0.928813	0.422786
							Gla	-0.33962	0.193488	2.62374	0.390871
							Tbc1d15	0.120844	-0.367642	-1.25322	0.386993
							Hspa13	0.354237	0.0759165	0.211116	0.362281
							Golga1	-0.165788	-0.321571	-2.04681	0.361792
							Mdh1	-0.0404121	0.321156	1.69597	0.323688
							Srprb	0.194693	0.247867	0.904977	0.315188
							Ppib	0.228688	0.210296	0.743527	0.310681
							Golga3	-0.280503	-0.129709	-2.70846	0.309041
							Stx5a	0.200397	-0.219093	-0.829939	0.296919
							Copg1	0.2656	-0.102908	-0.369645	0.284839
							Stx18	-0.271035	0.0590965	2.92691	0.277403
							Nfxl1	-0.248324	-0.118612	-2.69598	0.275197
							Kbtbd3	0.23103	0.143601	0.556129	0.272023
							Tvp23b	0.261808	0.0593725	0.223007	0.268455
							Tnfaip1	0.248086	-0.0969739	-0.372626	0.266366
							Arfip2	0.102228	-0.244784	-1.17519	0.265273
							Copb2	0.256349	0.0110697	0.0431554	0.256588
							Dhdds	0.0449701	0.252221	1.39435	0.256199
							Srp19	-0.0415342	0.249211	1.73594	0.252649
							Ncstn	0.1863	-0.148637	-0.673422	0.238329
							Preb	0.113325	-0.204083	-1.0639	0.233436
							Ufm1	0.0522846	0.226782	1.34421	0.232731
							Cdk7	-0.229262	0.0379672	2.97748	0.232384
							Gys1	0.028898	-0.229185	-1.44537	0.231
							Mef2c	-0.227928	-0.0216045	-3.04709	0.22895
							Ap3m1	-0.0669627	-0.20532	-1.88606	0.215964
							Gle1	-0.110326	0.173439	2.13734	0.205555
							Asb3	0.188579	0.0808089	0.404844	0.205163
							Hbp1	0.191812	-0.0685344	-0.343164	0.203688
							Eny2	-0.129576	0.139938	2.31777	0.190716
							Prdx6	0.148105	-0.0615823	-0.394054	0.160398
							Lrrc59	0.104376	0.0504828	0.450494	0.115943
							Srpr	0.050054	-0.0868777	-1.0481	0.100265
							Arcn1	0.0697808	-0.0707515	-0.792305	0.0993738
							Ufd1l	-0.0791347	0.0598784	2.49384	0.0992357
							Napa	0.0480245	0.0484142	0.789438	0.068193
							Gdap2	-0.0523227	-0.00110296	-3.12052	0.0523343
							Sec63	-0.0174209	-0.0313585	-2.07788	0.0358727

## Sheet: RIDD
DE genes	x	y	angle	r			Non-DE genes	x	y	angle	r			Non-Exp genes
Itgb2	1.22494	4.06252	1.27794	4.24317			Hacd1	0.195989	2.18391	1.48129	2.19269			Nxph4
Rnf130	1.11991	3.85226	1.28788	4.01175			Lgr4	-0.739531	-1.82578	-1.95565	1.96987			Pxdn
Bloc1s1	1.52974	3.5452	1.16344	3.86115			Ckap4	0.786519	1.70114	1.13772	1.87416			Aplp1
Hgsnat	1.15964	2.81935	1.18057	3.04852			Fads3	0.309296	1.64748	1.38522	1.67626			Fras1
Tapbp	1.78249	2.37482	0.926926	2.96935			Atp9a	1.25509	-0.89284	-0.618321	1.54026			Cpe
Lamp1	1.46713	1.95126	0.926087	2.44128			Enpp2	0.0183342	-1.49236	-1.55851	1.49248			Ptprg
Agpat2	-0.0529765	2.26212	1.59421	2.26274			Tmtc1	0.772095	-1.2265	-1.00896	1.44928			Atp2b4
Zdhhc16	0.787431	1.82023	1.16251	1.98326			Pvrl2	1.26429	0.299095	0.232301	1.29919			Sema6a
Tpp1	1.07677	1.66449	0.996601	1.98241			Cmtm4	0.216377	1.14327	1.38375	1.16357			Paqr3
Tex264	0.853617	1.78625	1.125	1.97974			Slc39a1	-0.652242	-0.783781	-2.26485	1.01967			Neo1
Tmem129	0.940916	1.6946	1.06393	1.93829			Ryk	-0.993537	-0.179981	-2.96238	1.00971			Sh3gl2
Tspan3	1.86317	0.408543	0.215857	1.90743			Ddr1	0.933066	0.0718891	0.0768942	0.935831			Nomo2
Ergic3	0.836831	1.6817	1.10906	1.8784			Ktn1	-0.517227	-0.748624	-2.17539	0.909924			Pcdh7
Htatip2	0.446336	1.76654	1.32331	1.82205			Adam15	0.064603	0.888235	1.49819	0.890581			Igfbp2
Hspa5	-1.70515	0.353303	2.93729	1.74137			Plxna1	-0.622213	0.634972	2.34605	0.88901			Lama4
Gnptg	0.602886	1.56078	1.20218	1.67318			Calr	-0.429786	0.777757	2.07563	0.888607			Prss23
Acsl3	-0.593095	1.54803	1.93667	1.65776			Gusb	0.832283	-0.256247	-0.298675	0.870837			Nptx2
Atp1a1	0.724624	1.38759	1.08953	1.56541			Cnnm3	0.473976	0.714932	0.98536	0.857777			Slit2
Txndc5	1.01554	1.07932	0.815833	1.48198			Lrrc8c	0.772707	-0.340504	-0.415062	0.844404			Reep2
Sqle	0.858339	1.12827	0.920449	1.41766			Ifi30	0.797485	0.186824	0.230117	0.819076			Gpc4
Furin	0.573504	1.27689	1.14866	1.39977			Tmem132a	0.587944	0.569689	0.769631	0.818672			Dsg2
Plxnb2	-0.27479	1.15986	1.80342	1.19197			Tmem64	0.500826	-0.644531	-0.910214	0.816239			Mxra7
Rpn2	0.685142	0.975054	0.95828	1.1917			Ctsb	0.353295	0.734202	1.1223	0.814783			Bace2
Pdia4	-0.715277	0.944758	2.21883	1.18499			Ppapdc2	0.610502	0.513254	0.699075	0.797586			Antxr1
Ern1	-0.789129	0.851345	2.31829	1.16082			Lrp11	0.302576	0.736867	1.18116	0.796571			Dsc2
Per1	-0.834183	-0.757037	-2.40464	1.12648			Cd151	-0.735723	-0.289531	-2.76667	0.790643			Ptprk
Ldlrad3	-0.684525	-0.780554	-2.29074	1.03819			Tmed2	0.677546	0.393056	0.525672	0.783302			Sgce
Icmt	0.447022	0.911212	1.11471	1.01496			Sort1	0.661569	-0.409675	-0.554452	0.778143			Tgfbr3
Galnt2	0.162337	0.958702	1.40306	0.972349			Slc35b1	0.238017	0.739234	1.2593	0.776607			Lamb1
Ephx1	-0.467436	-0.837604	-2.07981	0.959207			Itm2c	0.753656	-0.160292	-0.209563	0.770513			Ldoc1
							Abcc4	0.638955	0.420898	0.582486	0.765127			Slc18b1
							Atp2a2	-0.709799	0.277413	2.76901	0.762084			Ptprf
							B2m	0.666823	0.327652	0.456714	0.742973			Prkd1
							Slc39a14	-0.473756	-0.568453	-2.26558	0.739989			Slc6a15
							Gpaa1	0.451827	0.585485	0.913542	0.739554			Cbs
							Tmed9	0.415747	0.609392	0.972095	0.737702			Ppic
							Praf2	0.343622	0.637101	1.07616	0.72386			Angptl3
							Colec12	0.534304	-0.458939	-0.709666	0.704348			Cd59a
							Pde3b	0.370108	0.592699	1.0126	0.698764			Ces1g
							Cpd	0.361633	-0.591435	-1.022	0.693235			Col6a1
							Slamf6	0.279835	0.625443	1.15009	0.685191			Cyp1a2
							Tm9sf2	0.523065	-0.439799	-0.699136	0.683389			Cyp2e1
							Apoa1bp	0.356236	0.55156	0.99733	0.656599			Gpc3
							Rcn2	0.604574	-0.23327	-0.368242	0.648016			Gyltl1b
							Gemin5	-0.482997	0.415251	2.43147	0.636961			Ins
							Lman2	0.581454	0.239055	0.390068	0.628678			Mir17
							Sparc	0.615792	0.107606	0.172997	0.625123			Pdgfrb
							Itpr1	-0.364992	-0.503694	-2.19786	0.622034			Pmp22
							Hmgcr	0.482434	0.389371	0.679053	0.619961			Pr-4
							Npc2	0.394261	0.461311	0.863607	0.606835			Scara3
							Slc38a6	-0.55781	-0.214635	-2.77427	0.597679			Sumo
							Dnajc1	-0.513106	-0.298677	-2.61444	0.593705			Rn28s1
							P3h1	0.550938	-0.217778	-0.376435	0.592419
							Hexb	0.565364	0.134445	0.233466	0.58113
							Pld3	-0.315724	0.474165	2.15823	0.569661
							Cd99l2	-0.404239	0.385643	2.37973	0.558686
							Ndufs8	0.0371379	0.521661	1.49972	0.522981
							Tmem245	-0.27084	0.445125	2.11741	0.521048
							Slc25a1	0.488967	0.179931	0.352605	0.521022
							Txndc12	-0.243792	0.456874	2.06097	0.517849
							Tusc3	0.272459	0.434292	1.0105	0.512683
							Kdelr2	0.510358	-0.0404247	-0.0790436	0.511956
							Cd9	0.500119	-0.0703852	-0.139819	0.505047
							Tufm	0.481652	0.136823	0.276779	0.500709
							Cmtm8	0.261041	-0.426769	-1.02184	0.500274
							Asph	0.213931	-0.442713	-1.12066	0.491692
							Adam9	-0.15486	0.460991	1.89488	0.486306
							Prdx4	0.351352	0.335261	0.761967	0.485643
							Zdhhc24	0.417763	-0.221968	-0.488393	0.473071
							Dnajc3	-0.0114606	0.471849	1.59508	0.471989
							Kdelc1	-0.436353	0.164407	2.78127	0.466298
							Lamc1	-0.173791	0.428227	1.95633	0.462149
							Cmtm6	0.451272	-0.0255751	-0.0566128	0.451996
							Sulf2	0.40364	-0.201498	-0.463009	0.451139
							Abhd16a	0.334659	0.301377	0.73312	0.450361
							Scamp2	0.410708	-0.159673	-0.370792	0.440654
							Tomm20	-0.184453	0.393702	2.00894	0.434769
							Gstk1	0.178102	-0.386302	-1.1388	0.425382
							Mgat4b	0.148551	0.396911	1.21267	0.423799
							Prkcsh	0.151108	0.393683	1.2043	0.421687
							Donson	-0.332777	-0.244185	-2.50855	0.412755
							Tmed5	-0.403245	-0.0648055	-2.98225	0.408419
							Atp2b1	0.285913	0.284187	0.78237	0.403123
							Cst3	0.351413	0.194513	0.50554	0.401655
							Pttg1ip	0.205648	-0.343678	-1.03157	0.400507
							Pdk2	0.281091	-0.281551	-0.786216	0.397848
							Amfr	0.162509	0.35909	1.14582	0.39415
							Tmem131	0.35284	-0.174238	-0.458688	0.393515
							Ndc1	0.0706718	0.379923	1.38688	0.38644
							Ppp2r1a	0.371949	0.0101428	0.0272625	0.372088
							Stom	0.0906886	-0.352143	-1.31874	0.363633
							Zdhhc9	0.203038	-0.295945	-0.969484	0.358898
							App	-0.237879	0.268597	2.29562	0.358791
							Rcn1	-0.350435	-0.0426038	-3.02061	0.353016
							Slc39a10	0.314335	-0.157162	-0.463633	0.351435
							Asah1	-0.215402	-0.276666	-2.23233	0.350631
							Rpap1	0.345506	-0.0475399	-0.136736	0.348761
							Rtn4	0.316348	-0.127646	-0.383518	0.34113
							Cdipt	0.337449	0.0487157	0.143374	0.340947
							Noc2l	-0.230634	0.246626	2.3227	0.337663
							Serinc3	-0.171991	-0.287948	-2.10923	0.335403
							Micu1	0.329105	0.0443407	0.133925	0.332078
							Comt	-0.323577	-0.048673	-2.99229	0.327218
							Tspan33	0.258901	0.183669	0.617017	0.317433
							Yipf3	0.314627	0.00163884	0.00520878	0.314632
							Ggh	-0.0885173	0.300214	1.85752	0.312991
							Ppib	0.228688	0.210296	0.743527	0.310681
							Mtr	-0.221141	-0.217279	-2.365	0.310022
							Tmco3	0.084969	-0.292378	-1.28797	0.304474
							Sumf2	0.0670909	0.29365	1.34618	0.301217
							Npc1	-0.175616	-0.244206	-2.19425	0.300795
							Pepd	0.279295	0.0982735	0.338333	0.29608
							Rnf167	0.239571	-0.170992	-0.61989	0.294334
							Ergic2	0.0363486	0.283286	1.44318	0.285608
							Sppl2a	0.262521	-0.110339	-0.397888	0.284766
							B4galt1	0.282144	0.0301374	0.106412	0.283749
							Adpgk	-0.268814	-0.086047	-2.8318	0.28225
							Fam8a1	-0.281007	-0.00828816	-3.11211	0.28113
							Tmem50a	0.247249	0.121499	0.456746	0.275489
							Tmem38b	0.0172484	-0.273956	-1.50792	0.274499
							Slc36a4	0.270826	0.0413838	0.151633	0.27397
							Ctsc	-0.264879	0.0666996	2.89491	0.273148
							Rqcd1	0.224972	0.152518	0.595766	0.271798
							Chpt1	-0.267076	-0.0210186	-3.06306	0.267902
							Ywhaq	0.152768	0.216874	0.957118	0.265278
							Casc4	-0.259957	0.0405668	2.98679	0.263103
							Prkcd	-0.0520357	-0.24976	-1.7762	0.255123
							Nqo2	-0.210379	-0.123911	-2.60931	0.244158
							Galnt1	0.23932	0.0278538	0.115866	0.240935
							Twsg1	0.193817	0.142822	0.63506	0.240755
							Jagn1	-0.0296945	0.233566	1.69725	0.235446
							Nipa2	0.100081	-0.210837	-1.12761	0.233385
							Cstf2t	0.108654	-0.204093	-1.08159	0.231214
							Scpep1	0.120314	0.187745	1.00089	0.222988
							Xk	0.0275432	0.214776	1.44325	0.216535
							Itgb1	0.162362	0.122269	0.645461	0.203251
							Hsd17b12	-0.0828211	0.177254	2.0079	0.195649
							Cds2	0.117258	0.154754	0.922384	0.194161
							Ociad1	0.0565537	0.180178	1.26666	0.188845
							Tap1	0.15896	-0.0924439	-0.526745	0.183887
							Fam3a	-0.0562111	0.16598	1.89733	0.17524
							Eif2ak1	0.0954003	-0.145221	-0.989562	0.173753
							Gtf3c1	-0.0524961	-0.164758	-1.87925	0.172919
							Tsg101	-0.0582191	-0.15396	-1.93232	0.1646
							M6pr	-0.114019	0.114456	2.35428	0.161557
							Glb1	0.145619	-0.0632918	-0.410008	0.158779
							Dgat1	0.0188016	-0.149306	-1.44553	0.150485
							Siae	-0.0975199	-0.112153	-2.28652	0.148622
							Mkrn2	-0.104109	0.100272	2.37497	0.144544
							Ruvbl1	0.10906	0.0896224	0.687877	0.14116
							Reep3	0.129286	0.00660183	0.0510195	0.129454
							Lman1	0.022441	0.0645062	1.236	0.0682982
							Sec63	-0.0174209	-0.0313585	-2.07788	0.0358727

## Sheet: Homeostatic DC maturation
DE genes	x	y	angle	r			Non-DE genes	x	y	angle	r			Non-Exp genes
Slco5a1	2.5774	-2.15872	-0.697226	3.362			Cdcp1	3.47799	0.0391854	0.0112662	3.47821			Mmp7
Mmp23	2.12347	-0.761935	-0.344507	2.25603			Scube3	2.70313	-1.93636	-0.621608	3.32512			Rubcn
Creld1	-0.516485	1.68917	1.86753	1.76636			Pik3r3	2.48253	-1.89148	-0.651083	3.121			Dnajc22
St8sia6	1.13532	-1.27694	-0.844042	1.70866			Hecw2	1.76341	-1.47229	-0.695668	2.29723			Ace2
Eno3	1.58647	-0.545441	-0.331147	1.67762			Nuak1	1.92101	-0.726754	-0.361677	2.05389			Tdh
Cyp51	0.82095	1.27824	0.999889	1.51917			Ccdc120	1.43584	-0.503417	-0.337217	1.52153			A430093F15Rik
Rasal2	1.15886	-0.949461	-0.686405	1.49814			Kcnn1	0.939911	-0.69291	-0.635264	1.16771			Tnnt2
Sqle	0.858339	1.12827	0.920449	1.41766			Sox4	0.692175	-0.806864	-0.861758	1.06308			Glt28d2
Mical3	1.17959	-0.643862	-0.49964	1.34387			Vcam1	0.352705	-0.927575	-1.20744	0.992369			Inca1
Zfp36l1	0.176903	-1.11199	-1.41303	1.12598			Mvd	0.528626	0.719495	0.937147	0.892815			Psca
Chka	0.65798	-0.569418	-0.713368	0.870158			Spats2	0.334855	-0.779686	-1.16514	0.84855
							Hmgcs1	0.792427	0.229177	0.281527	0.824902
							Kdm5b	0.0852953	-0.80943	-1.46581	0.813912
							Mylip	0.0303881	-0.797216	-1.5327	0.797795
							Nup62	0.0583386	0.78616	1.49673	0.788321
							2200002D01Rik	0.620815	-0.419556	-0.594309	0.749292
							Pyroxd1	-0.595458	-0.439919	-2.5053	0.740337
							B4galnt1	0.442971	0.56825	0.908658	0.720508
							Nostrin	-0.66892	-0.186666	-2.86946	0.694477
							Slc7a6	0.357526	-0.591292	-1.02696	0.690979
							Gfpt1	0.512565	-0.453267	-0.72408	0.684232
							Mcemp1	0.473159	0.442936	0.752419	0.648129
							Galnt12	0.498684	-0.366913	-0.634327	0.619121
							Chst2	0.61183	-0.0659878	-0.107438	0.615378
							P3h1	0.550938	-0.217778	-0.376435	0.592419
							Mpp5	-0.126875	-0.568183	-1.79049	0.582176
							Sdhaf1	0.494283	0.294446	0.537255	0.575338
							Rad50	-0.168813	-0.541434	-1.87303	0.56714
							Csnk1g1	-0.113748	-0.553474	-1.77349	0.565042
							Vhl	0.554249	0.085508	0.15307	0.560806
							Rb1cc1	-0.305718	-0.462554	-2.15482	0.554455
							AI314180	-0.537626	-0.105424	-2.94796	0.547865
							Mios	-0.47186	-0.234739	-2.67997	0.527024
							Sc5d	0.424083	0.292406	0.603645	0.515119
							Fut4	0.427286	0.207663	0.452389	0.475076
							Josd1	0.308384	-0.333929	-0.825148	0.454542
							Ppcs	0.273251	0.350591	0.908742	0.4445
							Acp2	0.0252183	-0.436369	-1.51307	0.437097
							Kif13b	-0.0630779	-0.419222	-1.72014	0.423941
							Tsc1	-0.0893809	-0.402436	-1.78935	0.412243
							Etfdh	-0.134853	-0.384432	-1.90817	0.407398
							Tbc1d15	0.120844	-0.367642	-1.25322	0.386993
							Phka1	-0.0161918	-0.386539	-1.61266	0.386878
							Rcor3	-0.239092	-0.303927	-2.23736	0.3867
							Zfp568	-0.367105	0.0530502	2.99808	0.370919
							Prdx3	0.102861	0.329456	1.26817	0.34514
							Tpm1	0.339333	0.0409849	0.120199	0.341799
							Ttc39a	0.258253	-0.214294	-0.692639	0.335584
							Tmem8	0.326346	-0.0517299	-0.157204	0.33042
							Stxbp2	0.138709	0.279213	1.10972	0.311769
							Lzts2	0.198105	-0.235217	-0.870835	0.307527
							Ift57	0.017331	0.298328	1.51277	0.298831
							Hlx	0.289224	0.0210858	0.072776	0.289992
							Fbxl3	0.109323	-0.262157	-1.17571	0.284039
							Rab30	0.241959	-0.103971	-0.405849	0.263352
							Psmd1	-0.128908	0.209637	2.12211	0.246099
							Cables2	-0.214925	0.118947	2.63612	0.245644
							Mkks	0.194619	0.0279053	0.142414	0.196609
							Elk3	0.146016	-0.118426	-0.68144	0.188004
							Cln5	0.132604	-0.13253	-0.785117	0.187478
							Zfp180	-0.119154	0.140385	2.27457	0.184135
							Vrk2	-0.0747944	0.141159	2.05805	0.15975
							Wdr91	0.0923329	-0.0943089	-0.795985	0.131983
							Arfrp1	0.0680906	-0.086347	-0.903064	0.109964
							Cd2bp2	0.0723156	0.0605615	0.697169	0.0943252
							Appl1	-0.0916687	0.0112894	3.01905	0.0923613
							Ak2	-0.00198928	0.0724698	1.59824	0.0724971

## Sheet: Common DC maturation
DE genes	x	y	angle	r			Non-DE genes	x	y	angle	r			Non-Exp genes
Nupr1	-0.902684	3.97721	1.79398	4.07836			Serpinb9b	3.38041	-0.937706	-0.270591	3.50806			Arhgap8
Ccl22	2.98892	1.47466	0.458335	3.33291			Pla2g4f	3.39805	-0.641924	-0.186709	3.45815			Car13
Asprv1	2.79993	-1.56592	-0.509932	3.20807			Phldb1	1.96675	-1.83427	-0.750558	2.68936			Pla1a
Tmem176a	2.89147	-1.20402	-0.394567	3.13213			Rab20	1.28199	-2.11661	-1.02621	2.47458			Susd2
Nudt17	2.62008	-1.54482	-0.532744	3.04159			Il7r	1.75492	-1.73076	-0.778468	2.46481			Serpinb1b
Chst7	1.88868	-2.1123	-0.841231	2.83354			Eno2	2.05814	-1.30102	-0.563713	2.43487			Ocln
Cdkn2b	2.65365	0.983764	0.355015	2.83013			Stap2	1.65051	-1.72796	-0.808319	2.38957			C130026I21Rik
Fscn1	2.49618	-1.31931	-0.486211	2.82338			Pdzk1ip1	1.82607	1.42735	0.663451	2.31773			Sfmbt2
Efna2	2.25451	-1.56312	-0.606235	2.74338			Hcn3	1.67364	1.51219	0.734764	2.25561			Ndrg2
Tnfrsf4	2.17913	-1.65978	-0.65093	2.73925			Insl6	2.03737	-0.789848	-0.369841	2.18512			Tas1r3
1110032F04Rik	2.39019	-1.0884	-0.427305	2.62633			Agrn	0.76604	1.92937	1.19284	2.07588			BC016579
Scin	1.66895	-2.01468	-0.87898	2.61616			Adgrg6	1.38966	1.51097	0.827196	2.05285			1700047I17Rik2
Ankrd33b	2.14409	-1.41996	-0.584952	2.57166			Map1b	1.45809	-1.41765	-0.771337	2.03365			Mt2
Kcnk6	1.73645	1.87667	0.824187	2.55679			Rnf43	-0.325771	-1.81629	-1.74827	1.84528			Paqr3
Jag1	2.10918	-1.41918	-0.592276	2.54219			9330175E14Rik	0.325292	-1.72325	-1.38423	1.75368			Il4i1
Car2	-0.123505	2.53835	1.61941	2.54135			Tcf7	1.56179	-0.232786	-0.147961	1.57904			Tmem131l
Adora2a	2.30031	-1.02809	-0.420303	2.5196			Atrnl1	-0.61769	1.4415	1.97563	1.56827			Art2b
Ccr7	1.67169	-1.79889	-0.82203	2.45572			Tnfrsf9	1.53943	-0.256305	-0.16498	1.56063			Dusp14
Lamp1	1.46713	1.95126	0.926087	2.44128			Atxn1	-0.263466	-1.51301	-1.7432	1.53578			Phxr4
Papss2	1.78813	-1.55705	-0.716431	2.37104			Nbl1	1.2719	-0.803195	-0.563256	1.50427			Dao
Socs2	2.23412	-0.773125	-0.333155	2.36411			Dcbld2	0.271044	1.42516	1.38286	1.45071			Clec2g
Arc	2.02894	-1.19737	-0.533143	2.35591			Wbscr27	0.953585	1.07628	0.845772	1.43795			Gal3st2
Tmem176b	1.9821	-1.24296	-0.560103	2.33959			Tmem150c	1.08491	-0.874656	-0.678511	1.39357			E130311k13rik
Sidt2	1.16725	2.01282	1.04528	2.32678			Pdcd1lg2	1.27464	-0.415322	-0.314987	1.34059			Fah
Anxa3	2.02521	-0.950796	-0.438935	2.2373			Ksr1	1.25762	0.411974	0.316565	1.32338			Adm
Adcy6	1.66274	-1.47676	-0.726231	2.22385			Extl1	1.29255	0.218129	0.167183	1.31083			H2-eb2
Gbp8	-1.60797	1.53166	2.38049	2.22071			Cxcr5	-1.27162	-0.109124	-3.05599	1.27629			Foxh1
Nipal1	2.04267	-0.775476	-0.362831	2.18492			Lrp8	0.687006	-1.01589	-0.976181	1.22638			Ikbke
Ldlr	1.58943	1.48768	0.752343	2.17704			Inf2	1.0834	-0.573084	-0.486552	1.22564			Slamf1
Gatsl2	1.44209	-1.61653	-0.842367	2.16628			Spib	1.08351	-0.31733	-0.284904	1.12902
Slc2a6	1.96925	0.768378	0.372019	2.11385			Spsb1	0.43129	-1.02372	-1.17207	1.11086
Il21r	1.9426	-0.755291	-0.370818	2.08426			Sdc4	0.283925	-1.0555	-1.30802	1.09302
Mreg	1.52255	-1.41889	-0.750171	2.0812			Gadd45b	0.651106	-0.860645	-0.923127	1.07919
Snn	1.78507	-0.974669	-0.499775	2.03383			Mllt6	0.968353	0.435813	0.422901	1.0619
Sema6d	1.64912	-1.07074	-0.57587	1.96624			Tmtc2	1.01735	-0.300513	-0.28722	1.06081
Cacnb3	1.6757	-1.01133	-0.543009	1.95723			Vdr	0.497295	-0.919875	-1.07519	1.04569
Tmcc3	0.876439	-1.71948	-1.09941	1.92996			Pde2a	1.01815	-0.163159	-0.1589	1.03114
Tspan3	1.86317	0.408543	0.215857	1.90743			Fzd5	-0.931767	-0.410712	-2.72643	1.01827
Clec2i	1.63053	-0.949318	-0.527239	1.88675			Rasgrp1	0.992357	-0.222502	-0.220568	1.017
Lad1	1.48841	-1.04584	-0.612505	1.8191			H2-T10	-0.822585	0.568432	2.53691	0.99988
Marcksl1	1.46792	-0.8298	-0.514507	1.68622			Iffo2	0.938813	-0.338687	-0.346229	0.998037
Tmem39a	1.52477	-0.601554	-0.375773	1.63915			Prdm1	-0.226456	-0.96981	-1.80019	0.995898
Rnd1	1.3036	-0.966895	-0.638173	1.62304			Casz1	0.95994	-0.262559	-0.266986	0.9952
Ccl5	1.47413	-0.663105	-0.422712	1.6164			B3gnt5	-0.989987	-0.0915428	-3.04939	0.99421
Ncoa7	-0.658978	-1.46927	-1.99241	1.61028			Nrp2	0.913256	0.328885	0.345665	0.970671
Slc4a8	1.47742	-0.501403	-0.32718	1.56019			Fnbp1l	0.257002	-0.924965	-1.29978	0.960005
Pfkfb3	1.06196	-1.12073	-0.812316	1.54396			Stxbp1	0.474837	-0.826297	-1.04922	0.953015
Mxd1	1.28717	-0.815031	-0.56447	1.52351			Loxl3	0.779969	-0.545147	-0.61001	0.951597
Ehf	1.33013	-0.725411	-0.499279	1.51508			Dram1	0.430209	0.819491	1.08737	0.925551
Glipr2	1.31355	-0.73732	-0.511493	1.50634			Fam129c	0.802876	-0.455914	-0.516445	0.923291
Idi1	1.01115	1.09904	0.827024	1.49342			S1pr3	0.110991	-0.913047	-1.44983	0.919768
Ccng2	1.27695	-0.773497	-0.544626	1.49295			Nfat5	-0.300293	-0.860328	-1.90662	0.911231
Idh1	1.08684	-0.993577	-0.740599	1.47255			Ktn1	-0.517227	-0.748624	-2.17539	0.909924
Vsig10	1.43739	-0.19175	-0.132618	1.45012			Tnfaip2	-0.895147	-0.162291	-2.96224	0.90974
S1pr1	1.40603	-0.331433	-0.231496	1.44457			Rnf24	0.0580644	-0.898885	-1.50629	0.900758
Tmem19	1.25225	-0.655562	-0.482274	1.41347			Apobec1	-0.0719952	0.893369	1.65121	0.896266
Il12b	0.274862	-1.34154	-1.36871	1.36941			Cep350	-0.497686	-0.720296	-2.17542	0.87551
Rrad	0.800141	-1.10587	-0.944445	1.36498			St6galnac6	0.472418	0.735489	0.999841	0.874141
Relb	1.18764	-0.586008	-0.45837	1.32435			Serpinb9	0.236526	-0.840168	-1.29638	0.872826
Sema4c	1.2923	0.244601	0.187062	1.31525			Casp1	-0.659195	0.558414	2.43878	0.863923
Gclc	0.856221	-0.994661	-0.860056	1.31243			Phlpp1	0.175359	-0.84561	-1.36632	0.863601
Bcl3	1.29111	-0.175148	-0.134833	1.30294			Ptpn21	0.697478	-0.497845	-0.619914	0.856928
Il4ra	1.22694	0.276877	0.221948	1.25779			Ralgapa2	-0.0846954	-0.852412	-1.66983	0.85661
Bcl2l14	0.806129	-0.900873	-0.840844	1.20889			Arhgap28	0.631232	-0.576135	-0.739796	0.854625
Rasip1	1.10593	-0.478769	-0.408552	1.20511			Slc22a15	-0.590765	-0.593161	-2.35417	0.837164
Lpp	0.642032	-1.00376	-1.00175	1.19152			Cdc14b	-0.612446	-0.555941	-2.40452	0.82714
Serinc5	0.537755	-1.06286	-1.1024	1.19116			Ccser2	0.316787	-0.757189	-1.17455	0.820785
Il2rg	1.17803	-0.144492	-0.122046	1.18686			Rap2b	0.804834	-0.157877	-0.193702	0.820172
Cd274	0.749524	-0.912917	-0.883368	1.18119			Purg	-0.399133	-0.710286	-2.08276	0.814748
Bcl2l11	0.679864	-0.960714	-0.954944	1.17694			Cflar	0.505124	-0.639206	-0.902037	0.814699
Etv3	0.396312	-1.10258	-1.22574	1.17164			Plekhg2	0.122642	-0.798009	-1.4183	0.807378
Fas	0.992417	-0.604233	-0.546902	1.16189			Nfkbie	0.778121	-0.210201	-0.263842	0.806013
Rgs12	0.910244	-0.677695	-0.639985	1.13482			Lnx2	0.533308	-0.598938	-0.843298	0.801963
Nfkbia	0.726854	-0.867052	-0.873131	1.13141			Tab3	-0.74354	-0.298338	-2.76002	0.80116
Zbtb37	-0.790984	-0.801865	-2.34936	1.12634			Snx16	-0.0576293	-0.795607	-1.6431	0.797691
Zdhhc14	0.836376	-0.751786	-0.732186	1.12459			Slc26a2	0.67284	-0.40686	-0.543861	0.786288
Cblb	0.830884	-0.742426	-0.729233	1.11425			Csf2rb2	0.694433	-0.36256	-0.481166	0.783382
Tmem123	1.07443	-0.289268	-0.262992	1.11269			Ssh1	0.517747	-0.58068	-0.84263	0.777979
Ankrd12	-0.973546	-0.505299	-2.66284	1.09687			Optn	-0.455532	-0.628217	-2.19818	0.775993
Tnfrsf1b	0.644787	-0.842119	-0.91734	1.06062			Eml6	0.533924	-0.557834	-0.807295	0.772174
Nuak2	-0.339608	-0.998254	-1.89872	1.05444			Peak1	0.237686	-0.731797	-1.25675	0.76943
Ddhd1	0.600934	-0.858873	-0.960287	1.04823			Sik3	-0.0315625	-0.768359	-1.61185	0.769007
Dennd3	0.969293	-0.396453	-0.388252	1.04724			Slc6a6	-0.0174395	-0.764761	-1.5936	0.76496
Traf1	0.877926	-0.550316	-0.559919	1.03615			Pik3r1	-0.057328	-0.755355	-1.64655	0.757528
Foxp4	0.9691	-0.170142	-0.173796	0.983922			Il15ra	0.74106	0.155883	0.207329	0.757277
Nabp1	0.558381	-0.792744	-0.957147	0.969656			Shmt1	-0.417196	0.625616	2.15893	0.751962
Ggta1	0.447818	-0.849409	-1.08562	0.960227			Snx11	0.673445	-0.320754	-0.444499	0.745929
Gca	0.614665	-0.687682	-0.841406	0.922345			Rftn1	0.647325	-0.368072	-0.517015	0.744652
Irf1	0.779851	-0.441404	-0.515052	0.896106			Llgl2	0.623498	-0.405917	-0.577101	0.743988
Rras2	0.78121	-0.383069	-0.455901	0.870076			Rcsd1	0.673123	-0.313419	-0.435767	0.742514
							Ric1	0.282141	-0.681622	-1.17834	0.737708
							Hsf2	-0.537294	-0.503075	-2.38907	0.73605
							Sel1l	-0.567329	0.454994	2.46564	0.727243
							Gpr132	0.211251	-0.694391	-1.27547	0.725814
							Tmem18	0.495742	0.529146	0.817979	0.72509
							Atmin	0.592393	-0.406566	-0.60148	0.718488
							Stoml1	0.193729	0.690947	1.29743	0.717592
							Pvr	0.301137	-0.650509	-1.13725	0.71683
							Nfe2l1	-0.535951	0.464341	2.42766	0.709124
							Hsd17b11	-0.447822	-0.545582	-2.2581	0.705836
							Cd200	0.149427	-0.685418	-1.35615	0.701517
							Atp11a	0.103724	-0.691632	-1.42194	0.699366
							Zfp513	0.691592	-0.0174513	-0.0252282	0.691812
							Dirc2	0.0481123	-0.68445	-1.50062	0.686139
							Ino80d	0.429542	-0.53453	-0.893872	0.685732
							Dusp5	-0.107918	-0.673357	-1.72971	0.68195
							Basp1	0.488698	-0.470719	-0.766661	0.678529
							Crebl2	0.674097	-0.0649288	-0.0960234	0.677217
							Spred1	0.46133	-0.494634	-0.820222	0.676379
							Ly75	0.399945	-0.544511	-0.937287	0.675609
							Mocos	0.667389	-0.0882697	-0.131498	0.673201
							Swap70	0.588608	-0.322912	-0.50177	0.671365
							Arhgef40	-0.0322129	-0.669438	-1.61888	0.670212
							Rhebl1	0.481934	0.463566	0.765974	0.668696
							Fabp5	0.532118	-0.402954	-0.648134	0.667474
							Map3k14	0.113731	-0.647834	-1.39701	0.657741
							Ulk3	0.590756	-0.288325	-0.454051	0.657361
							Pias3	0.47377	-0.451085	-0.760875	0.654168
							Cttnbp2nl	-0.0697482	-0.647584	-1.67809	0.651329
							Renbp	0.62752	-0.170805	-0.265753	0.65035
							Dip2b	0.572761	-0.306793	-0.49175	0.649752
							Lgals8	-0.645059	0.073837	3.02762	0.649271
							Arhgap31	0.285976	-0.58151	-1.11374	0.648025
							Rabgef1	-0.175595	-0.622913	-1.84556	0.64719
							Akt3	-0.61342	-0.203824	-2.8208	0.646397
							Rbpms	0.627421	0.152506	0.238445	0.64569
							Atp6v0a1	0.607526	-0.209121	-0.331514	0.64251
							Kdm2b	0.307773	-0.563308	-1.07075	0.641904
							Gypc	0.108476	-0.630569	-1.40043	0.639831
							Vps13d	0.141752	-0.618897	-1.34564	0.634923
							Arhgap22	0.610514	-0.162006	-0.259383	0.631644
							Slc22a23	0.518402	-0.359777	-0.606695	0.631015
							Ubxn2a	-0.581648	-0.233135	-2.76038	0.626631
							Stat3	0.199235	-0.592805	-1.24657	0.62539
							2810474O19Rik	-0.491689	-0.385191	-2.47705	0.624604
							Lmbr1l	0.605322	0.152098	0.246171	0.624138
							Ncoa5	0.488662	-0.371531	-0.650062	0.613862
							Zc3h7b	0.0390952	-0.610842	-1.50688	0.612092
							Birc3	0.351101	-0.498354	-0.957042	0.609613
							Mapkbp1	-0.581118	-0.181031	-2.8396	0.608663
							Dnm1l	-0.128797	-0.594049	-1.7843	0.607851
							Tle3	0.404341	0.446256	0.834635	0.602193
							Dok1	0.592003	0.102248	0.171027	0.600768
							Thap2	-0.467039	-0.372597	-2.4682	0.597456
							Rnf19b	-0.0911818	-0.588601	-1.72449	0.595621
							Plekhm2	0.594028	-0.0342033	-0.057515	0.595012
							Cnn3	-0.335863	0.48931	2.17234	0.593488
							Smg1	-0.290778	-0.516615	-2.08345	0.592826
							Slc33a1	0.539569	-0.245188	-0.426519	0.592665
							Adap1	0.582036	0.104394	0.177473	0.591324
							Mier3	0.0896409	-0.582974	-1.41823	0.589826
							Get4	0.390979	0.440422	0.844797	0.588928
							Zfp281	0.381733	-0.446454	-0.863387	0.587402
							Stx11	0.576606	-0.110748	-0.189757	0.587146
							Fam53b	0.482355	-0.333701	-0.605212	0.586535
							Birc2	0.576366	-0.104036	-0.178581	0.58568
							Spint2	0.57924	-0.0838536	-0.143766	0.585278
							Tbl1x	-0.560574	-0.135629	-2.90421	0.576748
							Ppp1r16a	0.490628	0.3028	0.552948	0.576545
							Zbtb10	0.2951	-0.494621	-1.03287	0.575963
							Lrrk1	0.320744	-0.476726	-0.978555	0.574582
							Pias1	0.34647	-0.452923	-0.917787	0.570246
							3110043O21Rik	0.53902	-0.183363	-0.327899	0.569354
							Zbtb22	0.285753	0.488702	1.04169	0.566113
							Inpp5a	-0.0235093	-0.563769	-1.61247	0.564258
							Nr2f6	0.513288	0.234236	0.428118	0.564208
							Bmp2k	0.261715	-0.49687	-1.086	0.561582
							Cers6	-0.140432	-0.543682	-1.82357	0.561525
							Styx	-0.525433	-0.196312	-2.78403	0.560908
							Nsun4	0.416997	0.365788	0.720072	0.554695
							Amn1	0.52027	0.190404	0.350832	0.554016
							Mtmr4	0.241173	-0.495297	-1.11766	0.550894
							Aftph	-0.0202862	-0.550316	-1.60764	0.55069
							Kif1b	-0.192077	-0.515713	-1.92733	0.550321
							Mex3b	-0.0895752	-0.542559	-1.73442	0.549904
							Bcl2l1	0.452525	-0.309316	-0.599589	0.548138
							Mtmr12	0.304599	-0.45179	-0.977593	0.54488
							D17Wsu92e	0.231312	-0.485725	-1.12635	0.537991
							Med11	0.395376	0.362543	0.742105	0.536432
							Krit1	-0.23226	-0.470254	-2.02956	0.524484
							Tmem140	0.137194	-0.502533	-1.30429	0.520923
							Nudt9	0.228928	-0.465851	-1.11404	0.519062
							Exoc6b	-0.286143	-0.431217	-2.15665	0.517519
							Clptm1	0.473735	0.206345	0.41079	0.516724
							Mvp	0.502364	-0.117064	-0.22894	0.515823
							Uap1	0.513472	-0.0386025	-0.0750381	0.514921
							Tbc1d1	0.0777534	-0.507366	-1.41873	0.513289
							Dclre1a	-0.2566	0.442847	2.09596	0.511817
							Il15	0.415164	-0.299089	-0.624295	0.511679
							Samsn1	0.409891	-0.306254	-0.641681	0.511666
							Gramd1b	-0.222864	-0.457138	-2.02441	0.50857
							Rela	0.432365	-0.266184	-0.551845	0.507734
							Rusc1	0.506173	0.00499187	0.00986167	0.506198
							Wsb2	0.494763	-0.0944015	-0.188535	0.503688
							Tmtc4	0.215082	0.451536	1.12626	0.500145
							Pi4k2b	0.375959	-0.329535	-0.719689	0.499938
							Cnot4	-0.00412009	-0.499731	-1.57904	0.499748
							Clip1	-0.319496	-0.383809	-2.265	0.499387
							Gbp3	-0.488499	0.0900025	2.95939	0.496721
							Icam1	0.343363	-0.356477	-0.804134	0.494949
							Stk19	-0.393148	0.297123	2.49442	0.492795
							Lima1	0.00778533	-0.492012	-1.55497	0.492073
							Nfkb2	0.4036	-0.278055	-0.603262	0.49011
							Sepsecs	0.465057	-0.150685	-0.31334	0.48886
							Rasa2	0.034447	-0.486855	-1.50016	0.488072
							Cd40	0.422191	0.232583	0.503531	0.482017
							Rab12	0.290174	-0.382688	-0.922034	0.480262
							Rnf31	0.475964	-0.0560081	-0.117134	0.479248
							Herc6	-0.405431	-0.252081	-2.58533	0.477409
							Dapp1	-0.286103	-0.382044	-2.21358	0.477298
							Anxa4	0.433026	-0.19965	-0.432012	0.476836
							Kdm1b	-0.0448089	-0.473328	-1.66518	0.475444
							Zmat1	-0.175721	-0.440356	-1.95048	0.474122
							Rnf115	0.281457	-0.377267	-0.929833	0.470689
							Sirt1	0.210876	-0.413925	-1.09961	0.464545
							Stat5a	0.421978	-0.189034	-0.421166	0.462384
							Gramd3	0.0245189	-0.461441	-1.51771	0.462092
							Tab2	-0.237594	-0.392367	-2.11528	0.458697
							Flnb	0.0570972	-0.454785	-1.4459	0.458355
							Kansl1	0.0579287	-0.453654	-1.44379	0.457337
							Socs1	0.45273	0.0402268	0.088621	0.454514
							Tank	0.398377	-0.216884	-0.498547	0.453589
							Etnk1	0.376158	-0.249838	-0.586282	0.451568
							Agap1	-0.446676	-0.0608503	-3.0062	0.450802
							Prr14	0.330006	-0.305138	-0.746264	0.449459
							Wdr37	0.165197	-0.417153	-1.19373	0.448672
							Sema7a	-0.41354	-0.172582	-2.74624	0.448107
							Stk4	0.0481993	-0.444854	-1.46287	0.447458
							2610002M06Rik	-0.404917	0.184747	2.71355	0.445073
							Rassf3	0.105796	-0.428281	-1.32862	0.441155
							Parp3	-0.28101	0.338335	2.2639	0.439815
							Cdk17	0.369635	-0.235051	-0.5664	0.43804
							Zhx2	-0.431311	-0.071744	-2.97676	0.437237
							Csrp1	0.397631	0.177885	0.420657	0.435607
							Ube2l6	0.422128	0.1037	0.24089	0.434679
							Mfsd7b	-0.309101	-0.299767	-2.37152	0.430586
							Sh3bp4	0.342873	-0.254197	-0.637956	0.426823
							Eps8l2	0.277056	-0.322704	-0.861361	0.425321
							Rnf19a	0.103552	-0.411869	-1.32448	0.424687
							Myo1g	0.419822	-0.00334729	-0.00797294	0.419836
							Zbtb18	-0.413063	0.0677612	2.979	0.418584
							Osm	0.0905102	-0.408303	-1.35265	0.418215
							Pogk	-0.416679	-0.0161863	-3.10277	0.416993
							Hook2	-0.335854	-0.24482	-2.5117	0.415614
							Spg11	0.412186	-0.0418372	-0.101154	0.414304
							Donson	-0.332777	-0.244185	-2.50855	0.412755
							Gtdc1	0.176446	0.371401	1.12728	0.411183
							Tanc1	-0.0595392	-0.405769	-1.71649	0.410114
							Ispd	0.350566	0.207531	0.534507	0.407389
							Mif4gd	0.403701	-0.0364392	-0.0900189	0.405342
							Llgl1	0.339385	0.22007	0.575277	0.404491
							Gm527	0.400215	0.050739	0.126107	0.403419
							Atp2b1	0.285913	0.284187	0.78237	0.403123
							Cdc42ep4	0.231227	-0.327812	-0.956478	0.401156
							Poglut1	0.381298	0.109018	0.278483	0.396576
							Pold3	-0.29507	-0.263697	-2.41228	0.395731
							Rab8b	0.0146321	-0.394577	-1.53373	0.394849
							Snx10	-0.281055	0.273575	2.36968	0.392218
							Csf1	-0.371862	-0.120172	-2.82902	0.390798
							Csf2rb	0.36752	-0.122373	-0.321422	0.387358
							Stat4	-0.0199054	-0.384537	-1.62251	0.385051
							Osbpl8	-0.284159	-0.257049	-2.40624	0.383172
							Stard7	0.347624	-0.155787	-0.421314	0.380936
							Zw10	-0.184523	0.332484	2.07746	0.380256
							Pnpla8	-0.0406948	-0.377416	-1.67821	0.379604
							Ninj1	0.273926	0.262124	0.763385	0.379136
							Ap3m2	-0.205708	-0.318058	-2.14489	0.378784
							Wrn	-0.176321	-0.334013	-2.0565	0.377695
							Papolg	-0.251279	-0.281506	-2.29952	0.377342
							Rab21	0.202049	-0.312965	-0.997524	0.372519
							Aida	0.256348	-0.269222	-0.809888	0.371746
							Nrde2	0.3623	0.042235	0.116051	0.364754
							Pcgf3	0.0353415	-0.36221	-1.47353	0.36393
							N4bp2l1	0.216982	-0.282015	-0.914995	0.355828
							Myo1c	0.203574	-0.291187	-0.960664	0.355292
							Elmod2	0.340175	-0.0801935	-0.231515	0.349499
							Lrig2	0.289409	0.189793	0.580438	0.346091
							Tada1	0.279699	-0.19827	-0.616653	0.342845
							Nxf1	0.1081	-0.325341	-1.25001	0.34283
							Dock9	0.205246	-0.267423	-0.91619	0.337107
							Rspry1	0.280108	-0.187081	-0.588848	0.336838
							Katna1	-0.298272	0.155187	2.66185	0.336228
							Rabgap1l	0.0699152	-0.328865	-1.36132	0.336215
							Herc3	-0.0791774	-0.326524	-1.80869	0.335986
							Clic4	-0.0438768	-0.330383	-1.70283	0.333284
							Sin3b	0.305553	0.124389	0.386607	0.329902
							Sbno2	0.307716	-0.112033	-0.349161	0.327476
							Nup85	-0.0074379	0.327091	1.59353	0.327175
							Tnfrsf11a	0.154724	-0.286638	-1.07583	0.325731
							Aebp2	0.0454182	-0.321965	-1.43066	0.325153
							Grina	0.270905	0.178352	0.582226	0.324344
							Sertad3	0.316062	0.0466118	0.146421	0.319481
							Zfyve1	0.178765	-0.260015	-0.968497	0.315539
							Nck1	0.181795	-0.256994	-0.955127	0.314794
							Pyhin1	-0.291879	-0.11607	-2.7631	0.31411
							Ptger4	-0.0827461	-0.302453	-1.83784	0.313568
							Frmd4a	-0.0324447	-0.309343	-1.6753	0.31104
							Mfhas1	0.286791	0.110422	0.367531	0.307314
							Magi3	-0.10059	-0.286318	-1.90865	0.303474
							Litaf	-0.0085035	-0.295846	-1.59953	0.295968
							Cdk13	0.0898747	-0.28164	-1.2619	0.295632
							Hsh2d	0.293176	0.0286364	0.0973676	0.294571
							Nfkbib	0.288182	0.0528343	0.181323	0.292985
							Fbrsl1	0.25859	-0.133765	-0.477381	0.291139
							Kdm5c	-0.0627409	-0.284035	-1.7882	0.290882
							Enox2	0.168965	0.236233	0.949908	0.29044
							Reck	-0.234193	-0.171323	-2.51001	0.290168
							Traf6	0.134147	-0.254471	-1.08566	0.287665
							Daam1	0.186151	-0.218677	-0.865571	0.28718
							Pcgf5	0.282075	-0.0508582	-0.178384	0.286623
							Ppp4r2	-0.0455872	-0.280578	-1.73186	0.284257
							Lactb	0.250196	-0.128203	-0.473528	0.28113
							Traf2	0.244602	-0.136532	-0.509101	0.280127
							Pex13	0.212826	-0.173599	-0.684234	0.274648
							Smarce1	-0.229613	-0.150168	-2.56241	0.274359
							Zfand6	0.227411	-0.143051	-0.5615	0.268662
							Nedd1	-0.265154	-0.0258387	-3.04445	0.26641
							Trafd1	0.177817	-0.198023	-0.839107	0.266143
							Herc4	0.0365513	-0.261163	-1.43174	0.263708
							Cdc42ep3	0.243055	-0.0990665	-0.387032	0.262469
							Atxn7l1	-0.0469469	-0.253033	-1.75425	0.257352
							Traf5	-0.0790231	-0.243708	-1.88435	0.256199
							Ap1g2	0.228172	0.10934	0.446871	0.253017
							Rab22a	0.177872	-0.179045	-0.788684	0.252379
							Tmem70	0.250827	0.0266455	0.105834	0.252238
							Prnp	0.237589	-0.0816403	-0.330979	0.251225
							Tmem106a	0.24719	0.0326251	0.131225	0.249334
							Stat1	-0.0628101	-0.234981	-1.83199	0.243231
							Tbc1d10a	0.20798	-0.111655	-0.492696	0.236056
							Npepps	0.04168	-0.230723	-1.39207	0.234458
							Zfp46	0.161004	-0.170171	-0.813072	0.234266
							Specc1	-0.0374872	-0.22712	-1.73438	0.230193
							Rasa4	0.168936	-0.145782	-0.711958	0.223141
							Kansl3	-0.202859	0.0849794	2.74489	0.219939
							Ncf1	-0.217338	0.0101306	3.09501	0.217574
							C2cd5	0.0763162	-0.19744	-1.20196	0.211676
							Mapkapk3	-0.140877	-0.157132	-2.3017	0.211038
							Gbp2	0.0993003	0.184848	1.07783	0.209832
							Gnb4	0.179352	-0.1024	-0.518782	0.206526
							Cpne2	0.147572	0.144228	0.773937	0.206348
							Sav1	0.182748	-0.0914966	-0.464184	0.204373
							Hbp1	0.191812	-0.0685344	-0.343164	0.203688
							Mtf1	0.071161	-0.190846	-1.21389	0.203682
							Tmco4	-0.138426	-0.148213	-2.32206	0.202802
							Trip10	-0.096649	-0.175957	-2.07308	0.200753
							Ankib1	-0.0431089	-0.195962	-1.78733	0.200648
							Plcl2	0.0795211	-0.177885	-1.15041	0.194851
							Inpp5f	0.0893429	-0.172683	-1.09334	0.194426
							Fam126a	-0.0592234	0.183997	1.8822	0.193293
							Tapbpl	0.167305	0.088096	0.484668	0.189082
							Inpp5b	0.0485624	-0.180534	-1.30802	0.186952
							Tap1	0.15896	-0.0924439	-0.526745	0.183887
							Aspscr1	0.17166	-0.0453409	-0.258234	0.177547
							Arhgef3	0.140756	-0.0944771	-0.591144	0.169523
							Otud5	0.158638	-0.0495778	-0.302904	0.166205
							Kctd9	-0.11216	0.119809	2.32323	0.164116
							Nsfl1c	-0.0960234	0.125906	2.22235	0.158344
							Map2k1	0.0894753	0.130113	0.968391	0.157909
							Ankrd27	-0.148729	0.0485152	2.82628	0.156442
							Jade3	-0.140177	-0.0681897	-2.68884	0.155883
							Kpna3	0.0673169	-0.133059	-1.10242	0.149118
							Plagl2	0.143192	-0.0296942	-0.204475	0.146239
							Polr3c	0.105616	0.0961943	0.738747	0.142857
							Lamp2	-0.101565	0.0955725	2.38658	0.139462
							Tnip1	-0.110297	0.0365138	2.8219	0.116184
							Asl	0.0469142	0.098355	1.12573	0.108971
							Ehd1	0.0748442	0.0665695	0.726951	0.100166
							Ppp3cb	-0.0190074	0.0953945	1.76747	0.0972697
							Gabpb1	-0.0721076	-0.0484355	-2.55011	0.0868649
							Akirin2	0.000401748	-0.0762874	-1.56553	0.0762884
							Khnyn	-0.0251417	-0.0562375	-1.99121	0.0616016
							Mdm2	-0.0241608	-0.0389461	-2.12606	0.0458317
							Fbxo7	0.0362873	0.0173007	0.444892	0.0402005
							Mfsd1	0.0267993	0.0106052	0.376819	0.0288214

## Sheet: Cholesterol metabolism
DE genes	x	y	angle	r			Non-DE genes	x	y	angle	r			Non-Exp genes
Trib3	-3.32801	2.98514	2.41045	4.47065			Smo	1.10926	2.14909	1.09431	2.41848			Nr1d1
Ddit3	-3.06297	1.70147	2.63454	3.50382			Abca1	-1.90416	0.222382	3.02533	1.91711			Mt3
Dgat2	1.20179	3.24441	1.21605	3.45984			Dhcr24	0.211494	1.70387	1.4473	1.71694			Prkaa2
Abca2	1.0133	3.00721	1.24579	3.17334			Abca5	0.669947	1.47187	1.14365	1.61716			Angptl3
Cd81	1.31442	2.30309	1.05218	2.65178			Rora	-1.48126	-0.33714	-2.9178	1.51914			Cyp7b1
Soat2	-1.94624	1.40507	2.51629	2.40044			Ephx2	1.13491	-0.64755	-0.5185	1.30666			Osbpl5
Abca7	1.10685	2.02776	1.07115	2.31018			Tm7sf2	1.28681	0.198029	0.152693	1.30196			Abcg4
Ldlr	1.58943	1.48768	0.752343	2.17704			Lrp8	0.687006	-1.01589	-0.976181	1.22638			Apom
Apol7c	1.55835	-1.51748	-0.772111	2.17513			Pltp	0.654646	-0.923224	-0.953998	1.13177			Scp2d1
Srebf2	0.94677	1.6963	1.06173	1.94263			Fgf1	-0.937515	0.471701	2.67544	1.04949			Akr1c6
Hsd17b7	0.90172	1.41811	1.00443	1.68052			Sult2b1	-0.505957	-0.882193	-2.09152	1.01698			Egf
Fdps	0.545537	1.48097	1.21786	1.57825			Serac1	-0.906707	-0.322082	-2.80027	0.962213			Sec14l2
Cyp51	0.82095	1.27824	0.999889	1.51917			Clu	0.199262	-0.915776	-1.35655	0.937204			Adipoq
Idi1	1.01115	1.09904	0.827024	1.49342			Lpl	-0.744789	0.53195	2.52138	0.91525			Apoa5
Abcg1	1.43145	-0.421567	-0.286407	1.49224			Mvd	0.528626	0.719495	0.937147	0.892815			Lipg
Nus1	0.0496621	1.46487	1.53691	1.46571			Msmo1	0.616793	0.644333	0.807232	0.891963			Gnb3
Lbr	0.48086	1.37329	1.23399	1.45504			Apoe	0.229882	-0.833371	-1.30164	0.864496			Nr5a2
Sqle	0.858339	1.12827	0.920449	1.41766			Tmem97	0.390533	0.763762	1.09813	0.857816			Mlc1
Pparg	-1.08059	0.795223	2.50717	1.34166			Nr1h3	-0.0717012	-0.85202	-1.65475	0.855032			Inhba
Apol10b	1.09289	-0.746736	-0.599408	1.32364			Lrp5	0.589438	0.590637	0.786414	0.834439			Idi2
Commd9	0.50713	1.18283	1.16576	1.28696			Hmgcs1	0.792427	0.229177	0.281527	0.824902			Pnlip
Insig1	1.15586	0.540687	0.437541	1.27607			Mylip	0.0303881	-0.797216	-1.5327	0.797795			F7
Elovl6	-0.805707	0.943452	2.27761	1.24067			Ppapdc2	0.610502	0.513254	0.699075	0.797586			Ptchd2
Stard4	0.594937	0.955326	1.01381	1.12543			Scd1	0.571263	-0.549598	-0.766072	0.792717			Tspo2
Raly	0.0978704	1.11951	1.4836	1.12378			Hdac9	-0.550385	-0.516312	-2.38813	0.754654			Prom2
Fdft1	0.852615	0.518784	0.546618	0.998043			Scap	0.419156	0.587212	0.950864	0.721463			Agt
Tgfb1	0.660035	0.748079	0.847843	0.997631			Osbpl1a	-0.641718	0.326073	2.67147	0.719809			Nr0b2
Srebf1	0.691305	0.708658	0.797793	0.989999			Nfe2l1	-0.535951	0.464341	2.42766	0.709124			Shh
Smpd1	0.71166	0.682737	0.764659	0.9862			Mvk	0.454008	0.527474	0.860112	0.695954			Lepr
Sorl1	0.561138	0.782905	0.948924	0.963232			Med13	-0.127973	-0.679855	-1.75685	0.691795			Cetp
Tspo	0.72451	0.564113	0.661563	0.918225			Ran	0.0622295	0.667666	1.47786	0.67056			Akr1d1
							Lss	0.497561	0.440651	0.724815	0.664635			Msr1
							Dgkq	-0.456601	-0.452755	-2.36042	0.643017			Cav1
							Trerf1	0.130175	-0.625523	-1.36562	0.638925			Pla2g10
							Lrp6	-0.491704	-0.390313	-2.47065	0.627787			Cav3
							Hmgcr	0.482434	0.389371	0.679053	0.619961			Apob
							Npc2	0.394261	0.461311	0.863607	0.606835			Abca12
							Scarb2	0.588815	-0.0399061	-0.0676701	0.590166			Osbpl6
							Sec24a	-0.200029	-0.542887	-1.92382	0.578565			Nr1h4
							Ggps1	-0.567809	0.0172726	3.11118	0.568072			Vldlr
							Dhcr7	-0.287855	0.455464	2.13442	0.538803			Hmgcs2
							Ldlrap1	0.17969	-0.507106	-1.23026	0.538001			Mall
							Fdx1	0.27853	0.45621	1.02267	0.534515			Pmp2
							Pmvk	0.43577	0.308265	0.615678	0.533782			Hsd3b1
							Dag1	0.469611	0.245862	0.482306	0.530078			Apoc3
							Aacs	0.510585	-0.0914302	-0.177192	0.518706			Apoc2
							Sc5d	0.424083	0.292406	0.603645	0.515119			Apoc1
							Gramd1b	-0.222864	-0.457138	-2.02441	0.50857			Apoa2
							Ttc39b	-0.173998	-0.474655	-1.92216	0.505542			Cyp39a1
							Acat2	0.498348	0.081643	0.162385	0.504992			Cel
							Anxa2	-0.300408	0.403937	2.21025	0.503399			Serpina12
							Soat1	0.3846	-0.319042	-0.692497	0.499705			Lep
							2310035C23Rik	-0.114016	-0.4864	-1.80105	0.499584			Apof
							Sod1	-0.145854	0.473842	1.8694	0.495782			Mttp
							Lima1	0.00778533	-0.492012	-1.55497	0.492073			Syp
							Stx12	0.00852569	-0.488765	-1.55335	0.488839			Hsd3b2
							Tmem55b	0.479675	0.0349717	0.0727784	0.480948			G6pc
							Cyb5r3	0.440228	-0.185938	-0.399639	0.477884			Fabp4
							Gramd1c	-0.326835	-0.348487	-2.32414	0.47777			Osbp2
							Sirt1	0.210876	-0.413925	-1.09961	0.464545			Il4
							Cnbp	-0.212274	0.401535	2.05711	0.454192			Cyp11a1
							Erlin2	0.306698	-0.311799	-0.793645	0.437359			Pla2g12b
							Cln8	0.431198	0.0649563	0.149517	0.436064			Apod
							Nfya	-0.268844	-0.34273	-2.23596	0.435593			Scarf1
							Hsd3b7	0.431074	0.0246743	0.0571768	0.431779			Hnf4a
							Ebp	0.328373	0.278609	0.703594	0.430641			Apol1
							Lamtor1	0.418192	0.0699471	0.165727	0.424001			Cyp7a1
							Prkaa1	-0.321277	-0.244732	-2.49061	0.403872			Abcg5
							Sp1	-0.00892879	-0.402459	-1.59298	0.402558			Abcg8
							Mbtps2	-0.34741	-0.19706	-2.62562	0.399408			Syt7
							Acaa2	-0.374378	0.117012	2.83866	0.392238			Malrd1
							Snx17	0.33282	0.19821	0.537139	0.387372			Fgfr4
							Osbpl8	-0.284159	-0.257049	-2.40624	0.383172			Prom1
							Cln6	0.370296	0.0497051	0.133433	0.373617			Apol8
							Acaca	0.0693747	-0.36616	-1.38355	0.372674			Cubn
							Arv1	-0.328773	-0.168523	-2.66793	0.369447			Agtr1a
							Acadl	0.106857	0.34395	1.26957	0.360167			Cyp11b2
							App	-0.237879	0.268597	2.29562	0.358791			Fabp3
							Scarb1	0.253769	0.25128	0.78047	0.357128			Ppard
							Cebpa	0.291803	-0.187071	-0.570084	0.346619			Lrp5l
							Fasn	0.339817	0.0662648	0.192585	0.346217			Abcb4
							Lipe	0.27832	-0.201984	-0.627784	0.343889			Lipc
							Apobr	-0.115018	-0.316467	-1.9194	0.33672			Acsm3
							Osbpl7	0.292912	-0.162829	-0.507359	0.335128			Acsm1
							Pla2g15	-0.193619	-0.27303	-2.18764	0.334714			Acacb
							Vps4b	0.0669456	-0.327767	-1.36932	0.334534			Apoa4
							Tgfbr1	0.0894942	-0.310451	-1.29013	0.323093			Ces1g
							Gba2	0.1796	-0.253129	-0.953709	0.310372			Pon1
							Osbpl3	-0.174029	-0.255346	-2.16903	0.309011			Ch25h
							Vps4a	-0.296587	-0.0750193	-2.89385	0.305927			Npc1l1
							Npc1	-0.175616	-0.244206	-2.19425	0.300795			Lcat
							Gba	0.296911	-0.0394689	-0.132157	0.299522			Ppara
							Osbpl2	0.0125671	0.287563	1.52712	0.287838			Cftr
							Ptch1	-0.208484	0.198116	2.38169	0.287603			Anxa2p2
							Nfyb	-0.272108	0.070438	2.88829	0.281077			Apoa1
							Anxa6	0.246304	-0.134566	-0.500031	0.280666			Gpihbp1
							Scp2	0.108538	-0.245811	-1.15499	0.268707			Osbpl10
							Cyp27a1	-0.0225625	-0.252387	-1.65996	0.253393			Cyp46a1
							Acat1	-0.128879	0.215581	2.10961	0.251167			Pcsk9
							Kpnb1	-0.209003	-0.117903	-2.62797	0.239965			Cyp11b1
							Gpam	0.118925	0.204977	1.04507	0.236979
							Gpld1	0.198174	-0.120165	-0.545082	0.231759
							Nsdhl	0.213964	-0.0880978	-0.390587	0.231391
							Cd36	-0.0824926	0.210957	1.94356	0.226512
							Insig2	0.127237	-0.184713	-0.967604	0.224295
							Stard3	0.170717	0.141591	0.692409	0.221793
							Nceh1	-0.0626742	-0.20036	-1.87396	0.209933
							Lmf1	-0.0877279	0.188859	2.00565	0.20824
							Nr1h2	0.20685	-0.00559987	-0.0270655	0.206926
							Erlin1	-0.0384374	-0.200791	-1.75994	0.204437
							Smad2	-0.195102	-0.00567565	-3.11251	0.195185
							Stard3nl	0.0128822	0.190896	1.50342	0.19133
							Hdlbp	-0.111609	0.148758	2.21447	0.185972
							Nfkb1	0.0364513	0.161069	1.34824	0.165142
							Acadvl	-0.0520991	0.150875	1.90329	0.159617
							Cat	-0.0336896	-0.153748	-1.78651	0.157396
							Ccr5	-0.14878	0.00738541	3.09199	0.148964
							Por	0.0640005	0.131915	1.11909	0.146621
							Gps2	-0.0988018	0.106712	2.31772	0.145428
							Fdxr	0.0116152	0.144474	1.49057	0.14494
							Mbtps1	-0.108011	-0.0847262	-2.47642	0.137277
							Il18	0.0505814	0.123941	1.18332	0.133865
							Rxra	-0.0879661	0.0885109	2.35311	0.124789
							Star	0.0934577	-0.0753281	-0.678397	0.120036
							Osbp	-0.0100745	-0.106122	-1.66545	0.106599
							Ehd1	0.0748442	0.0665695	0.726951	0.100166
							Stard5	0.0972537	-0.0144208	-0.147207	0.098317
							Cd24a	-0.0122699	0.0919817	1.70341	0.0927964
							Tgfbr2	0.00301629	-0.0915408	-1.53786	0.0915905
							Lrp1	-0.0849115	0.0339436	2.7613	0.0914447
							Acly	0.0860449	0.0293448	0.328671	0.0909111
							Plscr3	0.0817514	-0.0276305	-0.325929	0.0862945
							G6pdx	0.02855	-0.0789187	-1.22368	0.0839241
							Nfyc	-0.0711208	-0.04329	-2.59481	0.0832598
							Gramd1a	0.0372761	0.0264615	0.617326	0.0457134

## Sheet: ISR
DE genes	x	y	angle	r			Non-DE genes	x	y	angle	r			Non-Exp genes
Slc16a14	-5.65336	2.19487	2.77126	6.06449			Dysf	-3.47433	-0.810824	-2.91232	3.56769			Bdnf
Aldh1l2	-5.56846	1.78935	2.83068	5.84889			Ddit4	-0.136296	2.48904	1.6255	2.49277			Cxadr
Apbb2	-4.51002	0.211585	3.09471	4.51498			Adm2	-2.25466	0.875445	2.77123	2.41866			B4galnt2
Trib3	-3.32801	2.98514	2.41045	4.47065			Zfp708	1.11138	1.96179	1.05537	2.25473			Has2
Ciart	-4.07922	1.45293	2.79942	4.33024			Rab39b	-2.18123	-0.134783	-3.07988	2.18539			Itih1
Usp2	-3.77703	-1.95861	-2.66321	4.25466			Slc7a11	-0.870728	1.95687	1.98945	2.14185			Lcn2
Atf5	-4.01419	1.25899	2.83767	4.20699			Abcb1a	1.29539	1.45536	0.843489	1.94836			Ddr2
Nupr1	-0.902684	3.97721	1.79398	4.07836			Pld1	-1.39236	-1.21789	-2.42294	1.84984			Pax8
Plekhh3	-3.35931	2.16345	2.56944	3.99569			Per2	-1.63331	0.612723	2.7827	1.74445			Pik3c2g
Asns	-3.58061	0.957331	2.88034	3.70638			Emilin1	1.67786	0.329095	0.193681	1.70983			Prkg2
Slc6a9	-3.43466	1.292	2.7818	3.66962			Fads3	0.309296	1.64748	1.38522	1.67626			Ptn
Slc1a4	-2.37217	2.78321	2.27663	3.65697			Angptl4	-0.626153	-1.24438	-2.03699	1.39303			Reln
Ddit3	-3.06297	1.70147	2.63454	3.50382			Zfp938	-1.34355	0.193476	2.99857	1.35741			Snai2
Bcat1	-2.25191	2.40731	2.32285	3.2964			Itgb5	-1.3117	0.298166	2.91808	1.34516			Stc2
Slc1a5	0.447552	3.14535	1.42946	3.17703			Cmss1	-1.29978	-0.294339	-2.9189	1.33269			Vldlr
Inpp4b	-2.82664	0.683959	2.90419	2.90821			Pvrl2	1.26429	0.299095	0.232301	1.29919			Lurap1l
Ccl2	-2.81369	-0.392753	-3.0029	2.84097			Deb1	-0.534051	1.13225	2.01153	1.25188			Htra1
Phgdh	-2.46588	1.38724	2.62915	2.82931			Zfp608	-1.07621	-0.612825	-2.62396	1.23846			Trem3
Chac1	-2.69319	0.21175	3.06313	2.7015			Pbld2	1.15459	0.305742	0.258864	1.19439			Nrip2
Angptl6	-2.10253	1.61629	2.48621	2.65198			Tmtc2	1.01735	-0.300513	-0.28722	1.06081			Map3k20
Lhfpl2	-2.3057	-1.27543	-2.63632	2.63496			Ccp110	-0.950338	0.264109	2.87052	0.986355			Fibin
Slc25a33	-2.58571	-0.0953029	-3.10475	2.58747			Ptpn12	-0.98151	-0.0629097	-3.07759	0.983525			Flnc
Soat2	-1.94624	1.40507	2.51629	2.40044			Prdm15	-0.574969	-0.710858	-2.2509	0.91428			Degs2
Gpt2	-2.1451	0.993814	2.70774	2.36413			Tnfaip2	-0.895147	-0.162291	-2.96224	0.90974			Steap1
Klf4	-2.29372	0.072847	3.10984	2.29487			Sqstm1	-0.344998	0.832321	1.96374	0.90099			2810408A11Rik
Ifitm6	-1.31052	1.87436	2.18097	2.28707			Prss36	-0.864814	-0.251494	-2.85859	0.90064			Klhl40
Atf3	-2.13076	-0.610959	-2.86235	2.21662			Apobec1	-0.0719952	0.893369	1.65121	0.896266			Rd3
Gtpbp2	-1.53493	1.56235	2.34734	2.19019			Slc38a2	-0.88208	-0.15261	-2.97028	0.895185			1700016K19Rik
Slc7a5	-1.43303	1.54164	2.3197	2.10481			Cast	-0.873291	-0.137751	-2.98514	0.884089			Samd4
Sema6d	1.64912	-1.07074	-0.57587	1.96624			Tgif1	-0.305477	-0.822925	-1.92624	0.877794			Il23a
Pck2	-1.51509	1.21904	2.46406	1.94462			Nars	-0.809445	0.329256	2.75527	0.873848			Rbfox2
Psat1	-1.28846	1.41306	2.3101	1.91229			Serpinb9	0.236526	-0.840168	-1.29638	0.872826			Ugt1a6a
Eif4ebp1	-1.60667	1.01649	2.5775	1.90122			Synj2	-0.809846	0.312217	2.77363	0.867946			Hist2h4
Pla2g12a	0.353678	1.84038	1.38093	1.87405			Ptpn21	0.697478	-0.497845	-0.619914	0.856928			Ankrd1
Pycr1	-1.41592	1.16468	2.45324	1.83339			Spats2	0.334855	-0.779686	-1.16514	0.84855			Slco1a5
Htatip2	0.446336	1.76654	1.32331	1.82205			Fam83f	0.558787	0.630995	0.846014	0.842851			Zbtb7c
Cars	-1.72017	0.351984	2.93976	1.75582			Arl14ep	-0.571783	0.614745	2.32	0.839552			Cyp2ab1
Hspa5	-1.70515	0.353303	2.93729	1.74137			Lmbrd1	-0.444669	-0.707688	-2.13179	0.835795			Paqr3
Naaa	0.835859	1.42089	1.03905	1.64851			Mras	-0.0788667	-0.825287	-1.66607	0.829047			Cdh24
Jdp2	-1.58639	0.207178	3.01173	1.59986			Slc41a3	0.685151	-0.46445	-0.595725	0.827735			Dleu7
Eif2s2	-1.36218	0.763415	2.63077	1.56152			Tspyl4	-0.527344	0.63522	2.26367	0.825588			Slc1a7
Sars	-1.39199	0.60397	2.73222	1.51737			Ndrg1	-0.720367	-0.357043	-2.68144	0.803995			Optc
Yars	-1.42318	0.52108	2.79061	1.51557			Ncl	-0.770574	0.229287	2.85238	0.803963			Gm867
Mthfd2	-1.38956	0.597842	2.73529	1.51271			Sltm	-0.769033	-0.208263	-2.87712	0.796734			Cdsn
Elmsan1	-1.11569	-1.01914	-2.40139	1.5111			Kifc1	0.392814	0.689538	1.05297	0.793578			Flrt1
Shmt2	-1.18031	0.926942	2.47586	1.50078			Snrnp35	-0.198869	-0.764203	-1.82538	0.789655			Ndufa4l2
Sesn2	-1.00999	1.0716	2.32661	1.47255			Ier2	0.052427	-0.777618	-1.50348	0.779384			Fam159a
Tsc22d3	-1.29022	-0.637671	-2.68257	1.4392			Casc5	-0.768472	0.0774768	3.04111	0.772368			Defb43
Xpot	-1.19879	0.768191	2.57171	1.4238			Mid1ip1	-0.490376	0.59262	2.26207	0.769199			Akap2
Mthfd1l	-1.16941	0.791425	2.54663	1.41205			Bola1	-0.0535401	0.765558	1.64062	0.767428			Col18a1
Eprs	-1.19953	0.531886	2.72423	1.31217			Tnks	-0.422521	-0.640034	-2.15428	0.766921			Cp
Aldh18a1	-1.22972	0.446847	2.79305	1.30839			Abcc4	0.638955	0.420898	0.582486	0.765127			Bcar1
Cnpy2	0.477545	1.20472	1.1934	1.29592			Stk40	-0.379514	0.663936	2.09008	0.764749			Ddc
Slc7a1	-1.15574	0.480081	2.74789	1.25149			Macrod1	-0.678053	0.344399	2.67163	0.760504			F3
Gars	-1.06959	0.640917	2.60175	1.24692			Eif5	-0.689415	0.315315	2.71263	0.758101			Grb10
Lars	-1.21419	0.256813	2.93315	1.24105			Fbxo31	-0.59328	0.446967	2.49593	0.742806			H2-Q7
Rhbdd1	-1.20931	0.261172	2.92889	1.2372			Gpr85	-0.465605	-0.577285	-2.24951	0.74165			Il1r1
Iars	-1.17502	0.200732	2.97239	1.19204			Nipbl	-0.499031	-0.548069	-2.3094	0.741223			Il2
Ptprs	0.888417	0.773995	0.716678	1.17828			Kdm7a	-0.560437	-0.475024	-2.4385	0.734669			Serpina3c
Ppp1r15b	0.139828	1.16991	1.45184	1.17823			Hax1	-0.343375	0.646601	2.05897	0.73212			Ltbp3
Kdm6b	-0.672096	-0.943494	-2.18976	1.1584			Otub2	-0.0238186	0.724794	1.60365	0.725185			Nos2
Krtcap2	0.0273254	1.1401	1.54683	1.14042			Myom1	0.679985	-0.234864	-0.332567	0.719403			Osmr
Ppp1r15a	-0.833321	-0.770023	-2.39565	1.13462			Nfe2l1	-0.535951	0.464341	2.42766	0.709124			Pde1a
Mars	-1.01665	0.476143	2.70359	1.12262			Tbce	-0.703492	-0.00628445	-3.13266	0.70352			Ccl7
Aars	-0.996607	0.509922	2.66866	1.11948			Slc3a2	-0.70074	0.0173285	3.11687	0.700954			Slit1
Crybg3	-0.0144723	-1.06523	-1.58438	1.06532			Uqcrq	-0.2944	0.634236	2.00538	0.699233			Wisp1
Tmem154	-0.868362	0.613628	2.52642	1.06329			Zbtb7b	0.147058	0.67935	1.35762	0.695085			Vnn3
Cyb5r1	-0.374619	0.987877	1.93326	1.05652			B230217C12Rik	-0.675354	0.132544	2.9478	0.688237			Cabp1
Eif3c	-0.480325	0.902295	2.05998	1.02218			Bcat2	0.224004	0.650666	1.23924	0.688145			Tslp
Ghitm	-0.578334	0.813228	2.18897	0.997903			Spred1	0.46133	-0.494634	-0.820222	0.676379			Fgf21
Tars	-0.904325	0.349933	2.77238	0.969669			Rnaset2b	-0.384794	-0.555592	-2.17653	0.675832			Bhlhe22
Arpc5l	-0.686477	0.664385	2.37255	0.955331			Mycbp2	-0.281864	-0.609962	-2.00367	0.671938			Bco1
Slc38a7	-0.303188	0.872772	1.90514	0.923934			Ran	0.0622295	0.667666	1.47786	0.67056			Klf15
							Rcc2	-0.457225	0.488118	2.32353	0.668815			Tmigd1
							Tpx2	0.0196041	0.663191	1.54124	0.663481			Ttc23
							Cebpg	-0.605152	0.268385	2.72416	0.661997			Wdr27
							Ylpm1	-0.291932	-0.590331	-2.03005	0.65857			Fbxl2
							Slc20a1	-0.651395	-0.0819908	-3.01638	0.656535			Ip6k2
							Snx33	0.479464	0.446427	0.749732	0.65512			Pgpep1l
							Fbxo11	0.122951	-0.642844	-1.38182	0.654497			Crispld2
							Runx3	-0.374707	-0.535869	-2.18102	0.653881			Acox2
							Slc35b4	0.51886	0.391918	0.646913	0.650242			Wwtr1
							Lgals8	-0.645059	0.073837	3.02762	0.649271			Cd276
							Zc3hav1	-0.45025	0.465965	2.33904	0.647958			Ank2
							Nme2	0.235972	0.602445	1.19747	0.647011			Hhipl1
							Arhgef2	0.239731	-0.599195	-1.19021	0.645373			Zfp365
							Mrpl13	-0.128555	0.631013	1.77177	0.643975			Tmem74
							Ifi44	-0.221469	0.593452	1.92798	0.63343			Kcnt2
							B9d2	-0.0165075	0.62967	1.59701	0.629886			BC055111
							Arid5b	-0.622709	0.00570006	3.13244	0.622735			Cct8l1
							Cd74	0.59787	-0.169784	-0.276697	0.621511			Prss35
							Dnaja3	-0.421367	0.452282	2.32082	0.61815			5930403L14Rik
							Acot2	-0.424685	0.447983	2.3295	0.61729			Cxcl3
							Fam175a	-0.153617	0.597057	1.82263	0.616502			Fam188b
							Eif1	-0.615072	0.0402424	3.07626	0.616387			Trim66
							Paxbp1	-0.404174	-0.463073	-2.28838	0.614649			Dnaic2
							Dut	0.257366	0.556703	1.13776	0.613315			BB014433
							Acaa1a	0.243129	0.555944	1.15853	0.606783			Gm5627
							Ruvbl2	-0.0688541	0.598935	1.68525	0.60288			Gm5820
							Gpx4	0.0970245	0.593581	1.40877	0.601459
							Phf21a	-0.342079	-0.49386	-2.17658	0.600762
							Ubp1	0.21101	-0.558784	-1.20973	0.597298
							Usp6nl	-0.282546	-0.52513	-2.06442	0.596317
							Zfc3h1	0.267045	-0.52848	-1.10291	0.592119
							Trim35	-0.00697231	-0.590005	-1.58261	0.590046
							Nf1	-0.15882	-0.567651	-1.84361	0.58945
							Usp11	0.555881	-0.193336	-0.334714	0.588542
							Vps54	-0.521614	-0.249992	-2.69467	0.578426
							Lrrk1	0.320744	-0.476726	-0.978555	0.574582
							Echs1	-0.325482	0.468426	2.17805	0.570405
							Itgb7	-0.180242	0.531311	1.89785	0.561051
							Uba3	-0.540223	-0.121649	-2.9201	0.55375
							4931414P19Rik	-0.544409	0.0840647	2.98839	0.550861
							Alkbh5	0.0626627	0.540725	1.45542	0.544344
							Cnot1	-0.150276	-0.517781	-1.85327	0.539147
							Got1	-0.510698	-0.168379	-2.82311	0.53774
							Kdm5a	-0.102495	-0.523235	-1.76423	0.533179
							Pkmyt1	0.530206	0.0244231	0.0460308	0.530769
							Bnip1	-0.111396	0.518123	1.78257	0.529963
							Herpud1	-0.52173	-0.0768401	-2.99536	0.527358
							Rprd2	0.333093	0.406887	0.884795	0.52584
							Maz	0.399371	0.340862	0.706521	0.525056
							Taf15	-0.104785	0.513693	1.77202	0.524271
							Manea	-0.494616	-0.164959	-2.81968	0.521399
							Aaed1	-0.270426	0.444404	2.11745	0.520216
							Dnajb12	-0.469964	0.220078	2.70363	0.518941
							Zfp945	-0.209436	0.473445	1.98728	0.5177
							P3h2	0.379124	-0.34602	-0.739779	0.513288
							Mettl21a	0.464421	0.21384	0.431506	0.511287
							Rpl13a	-0.280848	0.422402	2.15756	0.507246
							Pop5	-0.0808534	0.500741	1.73088	0.507226
							Pde4dip	-0.4918	-0.107894	-2.92563	0.503496
							Camsap1	-0.373694	-0.332392	-2.41462	0.500131
							Calcrl	-0.482045	0.102544	2.93199	0.492831
							Slc19a2	-0.319548	0.373498	2.27851	0.49154
							Pdap1	-0.137104	0.470803	1.85417	0.49036
							Aff1	-0.326055	-0.363971	-2.3013	0.488658
							Casp4	-0.27764	0.393195	2.18561	0.481338
							Rpl7	-0.185123	0.443372	1.96633	0.480468
							Zfp598	-0.455347	0.144585	2.83414	0.47775
							Dusp6	-0.430245	-0.202506	-2.70168	0.47552
							Hfe	0.473796	-0.0250725	-0.052869	0.474459
							Ankrd11	-0.47063	-0.0582391	-3.01847	0.47422
							Pfdn1	0.109084	0.461235	1.33856	0.473959
							Ube2g2	0.328655	-0.340727	-0.80343	0.473402
							Ets1	-0.462118	0.0924862	2.94407	0.471282
							March6	0.267723	0.387119	0.965745	0.470677
							Hmox1	-0.460046	-0.0719838	-2.98638	0.465644
							Atf6	-0.459351	0.0460357	3.04171	0.461652
							Rbm39	-0.288833	-0.357237	-2.25071	0.459394
							Tab2	-0.237594	-0.392367	-2.11528	0.458697
							Agap1	-0.446676	-0.0608503	-3.0062	0.450802
							Zbtb38	0.0208513	-0.450283	-1.52452	0.450765
							Serpinf1	-0.198767	0.40202	2.02997	0.448473
							H2afz	0.172864	0.413075	1.17446	0.447787
							Mrpl24	0.0979843	0.436623	1.35004	0.447483
							Fam96a	0.225587	0.378887	1.03377	0.440959
							Eif4g2	-0.41955	0.128732	2.84388	0.438856
							Mthfr	-0.388689	0.186911	2.69336	0.431295
							Kif13b	-0.0630779	-0.419222	-1.72014	0.423941
							Anp32b	-0.282546	0.316043	2.30029	0.423928
							Zyg11b	-0.384153	0.174526	2.71516	0.42194
							Klhdc10	-0.408225	-0.105077	-2.88966	0.421531
							Ppp2r5a	0.0956458	0.408258	1.34067	0.419312
							Clcn3	0.400093	0.123757	0.299986	0.418797
							Zbtb18	-0.413063	0.0677612	2.979	0.418584
							Nfu1	0.00169609	0.417186	1.56673	0.417189
							Mrpl54	0.0950114	0.401571	1.33847	0.412658
							Map4	0.289701	-0.290032	-0.785969	0.409933
							Dhx57	-0.109613	-0.391487	-1.8438	0.406542
							Dpysl2	-0.0982616	-0.393832	-1.81531	0.405905
							Crls1	0.0848487	0.395636	1.35954	0.404632
							Atp6v1g1	-0.0386666	0.397509	1.66776	0.399385
							Incenp	-0.219677	0.329003	2.15952	0.395602
							Rps6ka2	-0.353158	-0.170239	-2.69241	0.392048
							Tet3	0.0562586	-0.38633	-1.42619	0.390405
							Lonp1	-0.271073	0.27776	2.34401	0.388112
							Zc3h18	-0.379573	-0.0747941	-2.94704	0.386872
							Fam26f	0.266945	0.276397	0.802793	0.384259
							Edem3	-0.0548895	-0.3779	-1.71504	0.381865
							Phyhd1	0.174566	0.334382	1.08966	0.377206
							Fam129a	-0.369305	-0.0746272	-2.9422	0.37677
							Acaca	0.0693747	-0.36616	-1.38355	0.372674
							Nrbf2	0.371898	-0.0229575	-0.0616522	0.372606
							Hdac8	-0.138871	0.33852	1.96009	0.365897
							Lrif1	-0.201609	-0.304413	-2.15576	0.365121
							Lsg1	-0.335723	0.14218	2.74099	0.364589
							Akna	0.139353	-0.33409	-1.17562	0.361989
							Pacsin2	-0.360281	-0.0179636	-3.09177	0.360728
							Sh3bp5l	0.356808	-0.039366	-0.109884	0.358973
							Lmo4	0.0189698	0.357631	1.5178	0.358134
							Tnrc6c	-0.0302218	-0.356338	-1.65541	0.357617
							Ubr2	-0.353918	0.0446456	3.01611	0.356723
							Phf10	-0.291054	0.20596	2.52576	0.356555
							Mtm1	-0.209736	-0.28324	-2.20818	0.35244
							Gng5	-0.200894	0.289429	2.17756	0.352317
							Dhrs7	-0.109044	0.328265	1.89151	0.345903
							Uqcrc2	0.00164702	0.345639	1.56603	0.345643
							Tmem11	0.297919	0.172171	0.524019	0.344091
							Rhoq	-0.306718	-0.150515	-2.68539	0.341658
							9130023H24Rik	-0.165917	0.298004	2.07881	0.341079
							Lsm14a	-0.338517	-0.0023687	-3.1346	0.338526
							Vars	-0.225677	0.249512	2.30608	0.336432
							Clic4	-0.0438768	-0.330383	-1.70283	0.333284
							4921524J17Rik	-0.30851	-0.121089	-2.76757	0.331422
							Btf3l4	-0.283453	0.161855	2.62276	0.326409
							Gsto1	-0.145571	0.291087	2.03452	0.325458
							Slc9a9	-0.151615	-0.285792	-2.05855	0.323518
							Ccdc186	-0.0754256	-0.309779	-1.80963	0.318829
							Myl12a	0.284208	0.134079	0.440804	0.314247
							Etf1	-0.289828	0.120802	2.74668	0.313996
							Srsf1	0.280722	-0.136822	-0.453511	0.31229
							Mettl9	-0.0815338	0.295878	1.83969	0.306906
							Mff	-0.0411259	0.302543	1.7059	0.305325
							Tagln2	0.272098	0.135415	0.461781	0.303932
							Zfp623	0.078934	-0.292936	-1.30759	0.303384
							Dtnbp1	0.0223137	0.30231	1.49712	0.303133
							Rbm4	-0.266064	-0.144915	-2.64286	0.302969
							Snx12	0.274759	0.0909325	0.319607	0.289416
							Anapc1	-0.265642	-0.111955	-2.74273	0.28827
							Ick	-0.0239594	-0.286521	-1.65422	0.287521
							Daam1	0.186151	-0.218677	-0.865571	0.28718
							Mmp19	0.262691	0.114371	0.410631	0.286509
							Wars	-0.0418216	0.280323	1.71889	0.283426
							Ubr4	0.0635295	-0.275856	-1.34444	0.283077
							Ttc9c	-0.206769	-0.181646	-2.42079	0.275225
							Ipmk	-0.188718	-0.197131	-2.33439	0.272901
							Gpatch3	0.270699	0.0339474	0.124755	0.272819
							Fndc7	-0.23948	-0.129773	-2.64499	0.272382
							Amacr	0.169749	-0.207919	-0.886123	0.268413
							Ift172	-0.130921	-0.228578	-2.09095	0.263416
							Cth	-0.160375	0.201096	2.24401	0.257215
							Ube2l3	0.235958	0.0964526	0.388045	0.25491
							Coasy	0.175445	0.18467	0.811009	0.254724
							Cr1l	-0.114377	0.22579	2.03968	0.253107
							Tnpo1	-0.141947	-0.207924	-2.16981	0.251756
							Fcer1g	0.0545781	0.245399	1.35195	0.251395
							Slc25a39	0.249184	0.0297538	0.118842	0.250954
							Fam175b	0.187991	-0.163947	-0.717187	0.249438
							Tspan5	-0.010493	0.247726	1.61313	0.247948
							Golim4	-0.193854	0.154343	2.46918	0.247792
							Ormdl3	-0.239096	0.0556595	2.91287	0.245489
							Cluh	-0.108365	0.219972	2.02853	0.245216
							Gpam	0.118925	0.204977	1.04507	0.236979
							Ypel5	0.108084	-0.209611	-1.09471	0.235837
							Jagn1	-0.0296945	0.233566	1.69725	0.235446
							Rnf114	0.232162	0.00526121	0.0226579	0.232222
							Dpf2	0.105582	-0.206759	-1.09866	0.232156
							Sertad2	0.207198	-0.104242	-0.466125	0.231943
							Leprotl1	0.0409622	0.223706	1.3897	0.227426
							Gnpnat1	0.175473	0.143158	0.684325	0.226462
							Ywhag	0.223763	-0.0323638	-0.143638	0.226092
							Ptbp1	0.22292	0.0371084	0.164953	0.225988
							Scpep1	0.120314	0.187745	1.00089	0.222988
							Atxn2l	-0.0796291	-0.205136	-1.94107	0.220049
							Traf3ip2	0.0992843	-0.192448	-1.09451	0.21655
							Spidr	-0.0892895	0.196317	1.99765	0.215669
							Acad8	-0.0445377	0.206944	1.78278	0.211682
							Gsk3a	0.084215	0.191881	1.15722	0.209548
							Erlin1	-0.0384374	-0.200791	-1.75994	0.204437
							Cul2	-0.157024	-0.12987	-2.45056	0.203772
							Rsbn1	0.00891387	-0.200928	-1.52646	0.201126
							Tor3a	0.131987	-0.141482	-0.820104	0.193488
							Spen	-0.00192293	-0.188271	-1.58101	0.188281
							Cln5	0.132604	-0.13253	-0.785117	0.187478
							Inpp5b	0.0485624	-0.180534	-1.30802	0.186952
							Mdfic	-0.143279	0.120051	2.44418	0.186925
							Flad1	0.173216	0.0685845	0.377008	0.1863
							2810006K23Rik	-0.162053	-0.0891478	-2.63866	0.184956
							Surf6	-0.145518	0.110311	2.49295	0.182603
							Srpk1	-0.167649	0.0580598	2.8082	0.177418
							Gtpbp4	-0.0645492	-0.160243	-1.95373	0.172755
							Tbc1d9b	-0.161688	-0.0404633	-2.89637	0.166674
							Nfkb1	0.0364513	0.161069	1.34824	0.165142
							Pnrc2	-0.153486	0.0554967	2.79464	0.163211
							Tlcd2	-0.117764	0.107331	2.40251	0.159337
							Samd8	-0.0402534	-0.153619	-1.82707	0.158805
							Wwp2	-0.0766384	-0.135487	-2.08558	0.155661
							Nosip	-0.143903	0.0519528	2.79513	0.152994
							Per3	0.0612593	0.134355	1.143	0.147662
							Atl2	-0.0914487	-0.105849	-2.28334	0.139881
							Cnppd1	0.117104	-0.0707943	-0.543753	0.13684
							Wbp4	-0.099697	-0.0925373	-2.39342	0.136024
							Rai1	-0.0625806	-0.109741	-2.08906	0.12633
							Mat2b	-0.0448358	0.117363	1.93571	0.125636
							Tbpl1	-0.0733835	0.0950105	2.22846	0.120051
							Tti2	0.0459667	0.107239	1.16585	0.116676
							Slc25a28	0.102772	0.0509889	0.46055	0.114726
							Taf5	0.104182	-0.0308793	-0.288148	0.108662
							Stard5	0.0972537	-0.0144208	-0.147207	0.098317
							Ube2w	-0.0906913	-0.0214046	-2.90982	0.093183
							Usp36	-0.0336338	-0.086853	-1.94026	0.0931379
							Uhrf1bp1	-0.0625976	0.0667109	2.3244	0.0914812
							Ero1l	0.0176908	-0.0725309	-1.33156	0.0746572
							Khnyn	-0.0251417	-0.0562375	-1.99121	0.0616016
							Rad21	0.0219224	-0.0565636	-1.20105	0.0606633
							Lgals3	-0.0337319	0.0504117	2.1605	0.0606563
							Tmem189	0.00954404	-0.037295	-1.32027	0.0384968
							Ascc2	-0.0140889	-0.0201266	-2.18153	0.0245678
							Vac14	-0.000100625	0.00916687	1.58177	0.00916742
