# Supplementary material for: The unfolded protein sensor IRE1a is essential for homeostatic dendritic cell maturation
Source: Research Square preprint supplement (doi:10.21203/rs.3.rs-4763670/v1), 2024-08-06
Supplement: Supplementary file 3 [file 2ff6e3f60d62eb9eca57613f.xlsx]

## Sheet: Pre-cDC1s_DOWN
gene	cluster_id	baseMean	logFC	lfcSE	stat	p_val	p_adj.loc	p_adj.glb	contrast
Gm42418	Pre-cDC1s	2353.97	-0.84906	0.0869531	-9.76457	1.59784e-22	8.05149e-19	1.95732e-17	DKO-WT
mt-Rnr2	Pre-cDC1s	4152.3	-0.56809	0.0736041	-7.71819	1.17993e-14	2.97282e-11	1.44238e-09	DKO-WT
mt-Rnr1	Pre-cDC1s	1209.89	-0.554749	0.0833105	-6.65882	2.76043e-11	4.6366e-08	3.36676e-06	DKO-WT
Sec61b	Pre-cDC1s	696.744	-0.526011	0.102238	-5.14498	2.67551e-07	0.000224698	0.0324492	DKO-WT
H2-Q7	Pre-cDC1s	76.8947	-1.06609	0.23638	-4.51005	6.48118e-06	0.00362874	0.78272	DKO-WT

## Sheet: Pre-cDC1s_UP
gene	cluster_id	baseMean	logFC	lfcSE	stat	p_val	p_adj.loc	p_adj.glb	contrast
Calr	Pre-cDC1s	1082.06	0.52282	0.0842058	6.20883	5.33794e-10	6.72447e-07	6.50215e-05	DKO-WT
Hsp90b1	Pre-cDC1s	754.908	0.566201	0.106807	5.30116	1.1507e-07	0.000115968	0.0139683	DKO-WT
Hspa5	Pre-cDC1s	1517.08	0.981402	0.19899	4.93191	8.14302e-07	0.000586181	0.0986429	DKO-WT
Ccl4	Pre-cDC1s	724.563	0.554023	0.122555	4.52061	6.16625e-06	0.00362874	0.744784	DKO-WT
Herpud1	Pre-cDC1s	442.883	0.530193	0.124768	4.24945	2.143e-05	0.0107986	1	DKO-WT
Ddit3	Pre-cDC1s	38.6572	1.33852	0.338443	3.95495	7.65518e-05	0.0350677	1	DKO-WT

## Sheet: Proliferating cDC1s_DOWN
gene	cluster_id	baseMean	logFC	lfcSE	stat	p_val	p_adj.loc	p_adj.glb	contrast
Sec61b	Proliferating cDC1s	4161.77	-0.876037	0.0564895	-15.508	3.06459e-54	8.43145e-51	3.75949e-49	DKO-WT
mt-Rnr2	Proliferating cDC1s	16203.1	-0.647706	0.0434738	-14.8988	3.3578e-50	4.1918e-47	4.11881e-45	DKO-WT
S100a11	Proliferating cDC1s	4940.49	-0.514532	0.0487058	-10.5641	4.37262e-26	2.83063e-23	5.3586e-21	DKO-WT
Ost4	Proliferating cDC1s	1830.31	-0.629571	0.0603435	-10.4331	1.75037e-25	1.07016e-22	2.14486e-20	DKO-WT
Cd8a	Proliferating cDC1s	2384.98	-0.557899	0.0605378	-9.21571	3.09215e-20	1.54678e-17	3.78593e-15	DKO-WT
Dnajb9	Proliferating cDC1s	239.798	-1.23814	0.140154	-8.83412	1.00891e-18	4.62626e-16	1.2349e-13	DKO-WT
Serp1	Proliferating cDC1s	1415.21	-0.567039	0.0652472	-8.69063	3.60448e-18	1.46916e-15	4.41138e-13	DKO-WT
mt-Rnr1	Proliferating cDC1s	4204.21	-0.526652	0.0606812	-8.67899	3.99312e-18	1.5368e-15	4.88694e-13	DKO-WT
Crip1	Proliferating cDC1s	9522.08	-0.472947	0.0558443	-8.46903	2.47438e-17	9.07684e-15	3.02785e-12	DKO-WT
Cd207	Proliferating cDC1s	174.892	-1.4246	0.18072	-7.88294	3.19768e-15	8.37867e-13	3.90996e-10	DKO-WT
Spcs2	Proliferating cDC1s	1691.75	-0.510474	0.0663771	-7.69051	1.46549e-14	3.43142e-12	1.79137e-09	DKO-WT
Serf2	Proliferating cDC1s	3678.32	-0.402098	0.0523534	-7.68046	1.58516e-14	3.63431e-12	1.93756e-09	DKO-WT
H2-Q7	Proliferating cDC1s	1552.92	-0.634901	0.0837441	-7.58144	3.41736e-14	7.52161e-12	4.17636e-09	DKO-WT
Tram1	Proliferating cDC1s	686.714	-0.653128	0.0888863	-7.3479	2.01352e-13	4.10347e-11	2.45965e-08	DKO-WT
Rpl36al	Proliferating cDC1s	2130.69	-0.418545	0.0572034	-7.31678	2.53988e-13	4.90376e-11	3.10229e-08	DKO-WT
Tmem258	Proliferating cDC1s	1347.85	-0.502365	0.0687484	-7.3073	2.72558e-13	5.17156e-11	3.32908e-08	DKO-WT
Ostc	Proliferating cDC1s	1269.92	-0.480601	0.067631	-7.10623	1.19257e-12	2.15151e-10	1.4561e-07	DKO-WT
Snd1	Proliferating cDC1s	338.921	-0.747234	0.108325	-6.8981	5.27008e-12	8.65631e-10	6.4314e-07	DKO-WT
Ssr2	Proliferating cDC1s	1101.08	-0.479308	0.0698012	-6.86676	6.56774e-12	1.04751e-09	8.01448e-07	DKO-WT
Itm2c	Proliferating cDC1s	945.327	-0.505597	0.0744575	-6.79041	1.11814e-11	1.73311e-09	1.36416e-06	DKO-WT
Igha	Proliferating cDC1s	34.9947	-2.80404	0.413271	-6.785	1.16085e-11	1.77432e-09	1.41623e-06	DKO-WT
Nucb1	Proliferating cDC1s	384.192	-0.691058	0.102261	-6.75775	1.40149e-11	2.08424e-09	1.70971e-06	DKO-WT
Nucb2	Proliferating cDC1s	253.666	-0.888704	0.134125	-6.62595	3.45033e-11	4.93128e-09	4.20795e-06	DKO-WT
Creb3l2	Proliferating cDC1s	36.1209	-2.32846	0.353504	-6.58679	4.49436e-11	6.27186e-09	5.48056e-06	DKO-WT
Smim14	Proliferating cDC1s	668.88	-0.560889	0.0872584	-6.42791	1.29368e-10	1.73622e-08	1.57691e-05	DKO-WT
Gm34084	Proliferating cDC1s	276.363	-0.959965	0.152549	-6.29283	3.11725e-10	4.08397e-08	3.79856e-05	DKO-WT
Trappc1	Proliferating cDC1s	735.915	-0.509554	0.0816481	-6.24086	4.35174e-10	5.44215e-08	5.30173e-05	DKO-WT
Ssr1	Proliferating cDC1s	936.82	-0.464746	0.0747112	-6.22057	4.95349e-10	6.12507e-08	6.03434e-05	DKO-WT
Sec61a1	Proliferating cDC1s	515.089	-0.584592	0.0943013	-6.1992	5.6752e-10	6.9164e-08	6.91273e-05	DKO-WT
Pianp	Proliferating cDC1s	346.89	-0.716472	0.115598	-6.19798	5.71915e-10	6.9164e-08	6.96621e-05	DKO-WT
Surf4	Proliferating cDC1s	570.309	-0.533786	0.0873551	-6.11053	9.9299e-10	1.16254e-07	0.000120926	DKO-WT
Lars2	Proliferating cDC1s	378.152	-0.718468	0.119557	-6.00942	1.86189e-09	2.09083e-07	0.000226668	DKO-WT
Pdia5	Proliferating cDC1s	812.901	-0.477754	0.082081	-5.82052	5.86663e-09	6.26818e-07	0.000713734	DKO-WT
Dnase1l3	Proliferating cDC1s	2822.95	-0.821176	0.143272	-5.73158	9.9497e-09	1.03299e-06	0.00121011	DKO-WT
Dkk3	Proliferating cDC1s	42.5237	-1.87009	0.326403	-5.72939	1.00794e-08	1.03667e-06	0.00122583	DKO-WT
Cbr3	Proliferating cDC1s	200.533	-0.806815	0.142892	-5.64633	1.63914e-08	1.62511e-06	0.00199268	DKO-WT
Ufc1	Proliferating cDC1s	956.768	-0.406651	0.0723118	-5.62358	1.8704e-08	1.83783e-06	0.00227365	DKO-WT
Scp2	Proliferating cDC1s	1102.07	-0.406517	0.0729148	-5.57524	2.47196e-08	2.34516e-06	0.00300424	DKO-WT
Arf4	Proliferating cDC1s	928.539	-0.403046	0.0739452	-5.4506	5.02002e-08	4.56573e-06	0.00609787	DKO-WT
Tmed3	Proliferating cDC1s	708.8	-0.458835	0.0849838	-5.39908	6.69823e-08	5.94468e-06	0.00813439	DKO-WT
Mpo	Proliferating cDC1s	18.4653	-5.31899	0.987437	-5.38666	7.17781e-08	6.31935e-06	0.00871645	DKO-WT
Treml4	Proliferating cDC1s	641.311	-0.463943	0.0864459	-5.36686	8.01173e-08	6.94245e-06	0.00972792	DKO-WT
Mydgf	Proliferating cDC1s	665.865	-0.437636	0.0822757	-5.31914	1.04262e-07	8.89457e-06	0.0126569	DKO-WT
Cd7	Proliferating cDC1s	44.6241	-1.57088	0.302145	-5.1991	2.00255e-07	1.62045e-05	0.0242928	DKO-WT
Ttc39a	Proliferating cDC1s	324.943	-0.60543	0.116983	-5.17537	2.27454e-07	1.80082e-05	0.0275891	DKO-WT
Plpp5	Proliferating cDC1s	53.0499	-1.3429	0.262655	-5.11278	3.17453e-07	2.44306e-05	0.0384941	DKO-WT
Spcs3	Proliferating cDC1s	505.694	-0.483594	0.0977967	-4.94489	7.61852e-07	5.42218e-05	0.0922999	DKO-WT
mt-Atp8	Proliferating cDC1s	215.709	-0.657489	0.132976	-4.94443	7.63688e-07	5.42218e-05	0.09252	DKO-WT
Cenpv	Proliferating cDC1s	478.332	-0.480252	0.0990809	-4.84707	1.253e-06	8.56476e-05	0.151703	DKO-WT
Prss57	Proliferating cDC1s	86.3167	-0.99567	0.211398	-4.70992	2.47808e-06	0.000158554	0.299746	DKO-WT
Trib1	Proliferating cDC1s	886.314	-0.424585	0.0902787	-4.70305	2.56307e-06	0.000163044	0.310016	DKO-WT
Apoe	Proliferating cDC1s	159.008	-0.835167	0.178223	-4.68607	2.785e-06	0.000175137	0.336821	DKO-WT
Vwf	Proliferating cDC1s	173.27	-0.777898	0.171577	-4.53382	5.7927e-06	0.000335031	0.699759	DKO-WT
Tmem39a	Proliferating cDC1s	161.694	-0.708659	0.156333	-4.53302	5.81471e-06	0.000335031	0.702405	DKO-WT
Flt1	Proliferating cDC1s	96.4505	-0.905554	0.200671	-4.51262	6.4031e-06	0.000359521	0.773309	DKO-WT
Gm10177	Proliferating cDC1s	134.017	-0.779715	0.173737	-4.4879	7.19285e-06	0.000395786	0.8685	DKO-WT
Clnk	Proliferating cDC1s	76.6416	-0.996632	0.222559	-4.47805	7.53276e-06	0.000410386	0.909482	DKO-WT
Txndc11	Proliferating cDC1s	159.091	-0.692769	0.1547	-4.47814	7.52954e-06	0.000410386	0.909102	DKO-WT
Sec61g	Proliferating cDC1s	358.252	-0.496471	0.111621	-4.44784	8.67368e-06	0.000463368	1	DKO-WT
Edem2	Proliferating cDC1s	258.187	-0.541928	0.122249	-4.43298	9.29388e-06	0.000494102	1	DKO-WT
Abcg1	Proliferating cDC1s	154.888	-0.692882	0.157417	-4.40158	1.07468e-05	0.000563182	1	DKO-WT
Cdk5rap3	Proliferating cDC1s	365.41	-0.460323	0.104757	-4.39418	1.11189e-05	0.000577187	1	DKO-WT
Cd300e	Proliferating cDC1s	48.0407	-1.24218	0.283308	-4.38455	1.16225e-05	0.000600497	1	DKO-WT
Specc1	Proliferating cDC1s	348.341	-0.511411	0.119009	-4.29725	1.72928e-05	0.00084581	1	DKO-WT
Ear2	Proliferating cDC1s	59.5658	-1.13787	0.264993	-4.29396	1.75511e-05	0.000854643	1	DKO-WT
Cystm1	Proliferating cDC1s	382.46	-0.45117	0.1067	-4.22839	2.35372e-05	0.0011117	1	DKO-WT
Gm9530	Proliferating cDC1s	148.38	-0.679246	0.161172	-4.21441	2.50436e-05	0.00115316	1	DKO-WT
Gm8221	Proliferating cDC1s	29.9523	-1.60454	0.383799	-4.18068	2.9064e-05	0.00132642	1	DKO-WT
Neurl3	Proliferating cDC1s	178.909	-0.60594	0.145282	-4.1708	3.03536e-05	0.00136344	1	DKO-WT
Itgae	Proliferating cDC1s	77.5511	-1.04945	0.252021	-4.16415	3.12509e-05	0.00139803	1	DKO-WT
Txndc5	Proliferating cDC1s	452.953	-0.41096	0.0987837	-4.1602	3.17973e-05	0.001411	1	DKO-WT
Stt3a	Proliferating cDC1s	474.689	-0.416466	0.100315	-4.1516	3.30166e-05	0.00145701	1	DKO-WT
Tnf	Proliferating cDC1s	102.999	-0.850053	0.204788	-4.1509	3.31169e-05	0.00145701	1	DKO-WT
Lrrc28	Proliferating cDC1s	109.3	-0.768553	0.188091	-4.08606	4.38757e-05	0.00185712	1	DKO-WT
Bet1	Proliferating cDC1s	251.113	-0.49982	0.122589	-4.07721	4.55786e-05	0.00192181	1	DKO-WT
Hepacam2	Proliferating cDC1s	319.15	-0.481132	0.118456	-4.06169	4.87179e-05	0.00203083	1	DKO-WT
Hspa13	Proliferating cDC1s	138.768	-0.667406	0.164501	-4.05714	4.96763e-05	0.00205522	1	DKO-WT
Erlec1	Proliferating cDC1s	202.689	-0.54075	0.134167	-4.03043	5.56754e-05	0.00229479	1	DKO-WT
Ufl1	Proliferating cDC1s	227.449	-0.537476	0.134312	-4.00171	6.28855e-05	0.00254432	1	DKO-WT
Cacna1e	Proliferating cDC1s	255.258	-0.510646	0.128033	-3.98839	6.65243e-05	0.00263345	1	DKO-WT
Edem1	Proliferating cDC1s	374.802	-0.436732	0.109592	-3.98508	6.74584e-05	0.00266086	1	DKO-WT
Mir6236	Proliferating cDC1s	386.86	-0.503342	0.127168	-3.95808	7.55559e-05	0.00292779	1	DKO-WT
Gm43305	Proliferating cDC1s	814.745	-0.99591	0.251712	-3.95655	7.6041e-05	0.00293625	1	DKO-WT
Gm42418	Proliferating cDC1s	17560	-0.729328	0.18778	-3.88394	0.000102777	0.00380827	1	DKO-WT
Cpd	Proliferating cDC1s	118.905	-0.667734	0.176497	-3.78326	0.000154787	0.00545971	1	DKO-WT
Ctdp1	Proliferating cDC1s	330.025	-0.428105	0.114161	-3.75001	0.000176828	0.00615819	1	DKO-WT
Gmppa	Proliferating cDC1s	171.323	-0.549864	0.147199	-3.73551	0.000187335	0.0064831	1	DKO-WT
Apol7c	Proliferating cDC1s	1051.32	-1.13821	0.307368	-3.70307	0.000213008	0.00721279	1	DKO-WT
Nav2	Proliferating cDC1s	46.6906	-1.09977	0.300556	-3.65914	0.000253063	0.00846493	1	DKO-WT
Ufsp2	Proliferating cDC1s	288.558	-0.441222	0.121983	-3.61707	0.000297959	0.00964425	1	DKO-WT
Cd14	Proliferating cDC1s	71.0189	-0.808889	0.224435	-3.60412	0.000313217	0.0100918	1	DKO-WT
Tmem248	Proliferating cDC1s	284.526	-0.428039	0.119402	-3.58487	0.000337252	0.0107747	1	DKO-WT
Igsf6	Proliferating cDC1s	150.836	-0.558618	0.156308	-3.57383	0.000351794	0.011125	1	DKO-WT
Asph	Proliferating cDC1s	115.773	-0.68511	0.192467	-3.55963	0.00037138	0.0116773	1	DKO-WT
Tlr12	Proliferating cDC1s	218.271	-0.470796	0.132801	-3.54512	0.000392432	0.0122343	1	DKO-WT
Mpzl2	Proliferating cDC1s	74.8182	-0.926736	0.2622	-3.53446	0.000408617	0.0126315	1	DKO-WT
Selenom	Proliferating cDC1s	72.354	-0.782922	0.221991	-3.52681	0.000420596	0.0129292	1	DKO-WT
Map2k6	Proliferating cDC1s	222.941	-0.477324	0.135776	-3.51552	0.0004389	0.0134169	1	DKO-WT
Igkc	Proliferating cDC1s	148.912	-0.651578	0.187808	-3.46938	0.000521653	0.0154878	1	DKO-WT
Serpinb1a	Proliferating cDC1s	133.4	-0.659233	0.190028	-3.46914	0.000522124	0.0154878	1	DKO-WT
Itm2a	Proliferating cDC1s	18.1798	-1.60361	0.462568	-3.46676	0.00052677	0.0155836	1	DKO-WT
Trf	Proliferating cDC1s	350.5	-0.42144	0.123222	-3.42017	0.000625813	0.0179227	1	DKO-WT
Bvht	Proliferating cDC1s	16.1003	-1.67479	0.489765	-3.41958	0.000627179	0.0179227	1	DKO-WT
Scd1	Proliferating cDC1s	35.0351	-1.12354	0.328749	-3.41761	0.00063174	0.0179646	1	DKO-WT
S100a9	Proliferating cDC1s	25.9248	-1.60975	0.47308	-3.4027	0.000667231	0.0188279	1	DKO-WT
Armcx2	Proliferating cDC1s	41.4201	-0.986863	0.294518	-3.35077	0.000805863	0.0221713	1	DKO-WT
Carhsp1	Proliferating cDC1s	143.657	-0.528428	0.158756	-3.32856	0.000872951	0.0237793	1	DKO-WT
Armcx3	Proliferating cDC1s	87.3872	-0.729313	0.220213	-3.31186	0.000926784	0.0250596	1	DKO-WT
Gprc5c	Proliferating cDC1s	59.8395	-0.829704	0.25171	-3.29628	0.000979753	0.026298	1	DKO-WT
1600010M07Rik	Proliferating cDC1s	276.668	-0.41971	0.12794	-3.28052	0.00103616	0.027677	1	DKO-WT
Ccr9	Proliferating cDC1s	188.044	-0.47776	0.145834	-3.27605	0.00105268	0.0279825	1	DKO-WT
Bst1	Proliferating cDC1s	95.9646	-0.630105	0.192408	-3.27484	0.00105722	0.0280355	1	DKO-WT
H4c8	Proliferating cDC1s	94.3923	-0.632756	0.198749	-3.1837	0.00145407	0.0367863	1	DKO-WT
Rnu12	Proliferating cDC1s	13.541	-1.70283	0.536473	-3.17411	0.00150295	0.037849	1	DKO-WT
Slc33a1	Proliferating cDC1s	143.444	-0.508231	0.160761	-3.16141	0.00157009	0.0391811	1	DKO-WT
5830428M24Rik	Proliferating cDC1s	244.945	-0.400882	0.128084	-3.12984	0.00174902	0.0430604	1	DKO-WT
Atg13	Proliferating cDC1s	91.7445	-0.632618	0.204565	-3.0925	0.00198476	0.0472978	1	DKO-WT
Ptprs	Proliferating cDC1s	208.242	-0.427507	0.138443	-3.08796	0.00201539	0.0479035	1	DKO-WT

## Sheet: Proliferating cDC1s_UP
gene	cluster_id	baseMean	logFC	lfcSE	stat	p_val	p_adj.loc	p_adj.glb	contrast
Phgdh	Proliferating cDC1s	658.302	2.79971	0.128824	21.7329	1.00319e-104	1.10401e-100	1.23103e-99	DKO-WT
Hsp90b1	Proliferating cDC1s	8743.08	0.861918	0.0525354	16.4064	1.72074e-60	9.46838e-57	2.11107e-55	DKO-WT
Asns	Proliferating cDC1s	169.657	5.45613	0.345545	15.7899	3.64942e-56	1.33873e-52	4.47699e-51	DKO-WT
Ddit3	Proliferating cDC1s	295.06	1.93963	0.127481	15.2151	2.80814e-52	6.18072e-49	3.4448e-47	DKO-WT
Cox6a2	Proliferating cDC1s	169.32	5.8316	0.388983	14.9919	8.29368e-51	1.5212e-47	1.01738e-45	DKO-WT
Mthfd2	Proliferating cDC1s	1371.48	1.21013	0.0807962	14.9775	1.0297e-50	1.61884e-47	1.26311e-45	DKO-WT
Eif4ebp1	Proliferating cDC1s	737.497	1.60717	0.107883	14.8974	3.42809e-50	4.1918e-47	4.205e-45	DKO-WT
Sars	Proliferating cDC1s	756.804	1.35076	0.0911194	14.824	1.0245e-49	1.12746e-46	1.25666e-44	DKO-WT
Ifitm3	Proliferating cDC1s	1333.01	1.27784	0.0871563	14.6614	1.13838e-48	1.13889e-45	1.39633e-43	DKO-WT
Shmt2	Proliferating cDC1s	421.657	1.64239	0.123785	13.2681	3.54365e-40	3.24982e-37	4.34575e-35	DKO-WT
Psat1	Proliferating cDC1s	580.289	1.27907	0.0990742	12.9102	3.94086e-38	3.33609e-35	4.83248e-33	DKO-WT
Calr	Proliferating cDC1s	9466.2	0.657705	0.0551123	11.9339	7.87739e-33	6.19219e-30	9.6576e-28	DKO-WT
Eif2s2	Proliferating cDC1s	2719.94	0.738326	0.0635509	11.6179	3.34347e-31	2.45299e-28	4.09872e-26	DKO-WT
Nars	Proliferating cDC1s	1294.08	0.778567	0.0682975	11.3997	4.19802e-30	2.88745e-27	5.14593e-25	DKO-WT
Cars	Proliferating cDC1s	271.882	1.25741	0.126905	9.90832	3.83026e-23	2.21853e-20	4.69238e-18	DKO-WT
Pck2	Proliferating cDC1s	204.65	1.52715	0.15776	9.68022	3.65918e-22	2.01347e-19	4.48206e-17	DKO-WT
Atf5	Proliferating cDC1s	189.81	3.5876	0.374706	9.57442	1.02429e-21	5.36775e-19	1.25447e-16	DKO-WT
Cebpb	Proliferating cDC1s	204.875	1.47264	0.165039	8.923	4.53827e-19	2.17146e-16	5.55534e-14	DKO-WT
Aars	Proliferating cDC1s	392.789	0.971094	0.110764	8.76722	1.83131e-18	8.06143e-16	2.24145e-13	DKO-WT
Aldh18a1	Proliferating cDC1s	164.343	1.37623	0.157608	8.73197	2.50269e-18	1.05931e-15	3.06309e-13	DKO-WT
Atf4	Proliferating cDC1s	1413.16	0.708192	0.0816136	8.67739	4.04972e-18	1.5368e-15	4.95617e-13	DKO-WT
2410006H16Rik	Proliferating cDC1s	1216.13	0.625697	0.0743128	8.41978	3.77207e-17	1.33908e-14	4.61554e-12	DKO-WT
Iars	Proliferating cDC1s	426.504	0.986416	0.118208	8.34477	7.13552e-17	2.45395e-14	8.73045e-12	DKO-WT
Gars	Proliferating cDC1s	616.118	0.786844	0.0954891	8.24015	1.72e-16	5.73593e-14	2.10424e-11	DKO-WT
Hspa5	Proliferating cDC1s	11709.1	1.0174	0.123746	8.22171	2.00615e-16	6.49343e-14	2.4543e-11	DKO-WT
Yars	Proliferating cDC1s	258.554	1.13091	0.138058	8.19157	2.57834e-16	8.10703e-14	3.15411e-11	DKO-WT
Tbcb	Proliferating cDC1s	1439.88	0.520479	0.0637244	8.16766	3.14425e-16	9.61179e-14	3.8462e-11	DKO-WT
Lars	Proliferating cDC1s	715.506	0.692198	0.0856313	8.08346	6.2952e-16	1.8724e-13	7.69985e-11	DKO-WT
Manf	Proliferating cDC1s	3318.95	0.619486	0.0769765	8.04772	8.43503e-16	2.44283e-13	1.03167e-10	DKO-WT
Chac1	Proliferating cDC1s	93.9467	1.77151	0.221886	7.98391	1.41771e-15	4.00048e-13	1.73384e-10	DKO-WT
Trib3	Proliferating cDC1s	36.0129	4.46471	0.563137	7.92828	2.22202e-15	6.11333e-13	2.71726e-10	DKO-WT
Isyna1	Proliferating cDC1s	808.238	0.642061	0.081159	7.91115	2.55025e-15	6.84524e-13	3.11855e-10	DKO-WT
Derl3	Proliferating cDC1s	85.8636	1.8086	0.229813	7.86985	3.55067e-15	9.08724e-13	4.34148e-10	DKO-WT
Psph	Proliferating cDC1s	384.144	0.87265	0.111375	7.83521	4.68046e-15	1.17065e-12	5.72251e-10	DKO-WT
Slc1a4	Proliferating cDC1s	42.5392	2.93576	0.375952	7.80886	5.77058e-15	1.41123e-12	7.055e-10	DKO-WT
Arpc5l	Proliferating cDC1s	1808.32	0.532413	0.0683793	7.78617	6.90716e-15	1.65246e-12	8.44407e-10	DKO-WT
Tars	Proliferating cDC1s	437.042	0.829167	0.109638	7.5628	3.94498e-14	8.51265e-12	4.82108e-09	DKO-WT
Ormdl2	Proliferating cDC1s	635.534	0.645089	0.0854887	7.5459	4.49164e-14	9.50586e-12	5.48891e-09	DKO-WT
Gas5	Proliferating cDC1s	2802.31	0.498348	0.0663674	7.50893	5.96139e-14	1.23783e-11	7.28464e-09	DKO-WT
Snhg1	Proliferating cDC1s	1021.27	0.569105	0.0775438	7.33914	2.1497e-13	4.30136e-11	2.62595e-08	DKO-WT
Egr1	Proliferating cDC1s	2056.85	0.614562	0.0838027	7.33345	2.24309e-13	4.40807e-11	2.73993e-08	DKO-WT
Slc7a1	Proliferating cDC1s	357.137	0.796901	0.109885	7.25216	4.10171e-13	7.65074e-11	5.0093e-08	DKO-WT
Txnip	Proliferating cDC1s	349.908	0.761875	0.107029	7.11842	1.0917e-12	2.00236e-10	1.333e-07	DKO-WT
Nupr1	Proliferating cDC1s	27.5354	4.68738	0.663909	7.06027	1.66174e-12	2.94959e-10	2.02876e-07	DKO-WT
Ifitm6	Proliferating cDC1s	139.627	1.3486	0.193956	6.95311	3.57314e-12	6.04959e-10	4.36115e-07	DKO-WT
Pdia4	Proliferating cDC1s	659.942	0.611758	0.0882784	6.92987	4.21216e-12	7.02346e-10	5.14086e-07	DKO-WT
Gpr183	Proliferating cDC1s	249.74	0.910529	0.133375	6.82682	8.68194e-12	1.36492e-09	1.0593e-06	DKO-WT
Xpot	Proliferating cDC1s	158.468	1.05348	0.157336	6.6957	2.14637e-11	3.108e-09	2.6181e-06	DKO-WT
Dnajb11	Proliferating cDC1s	1097.76	0.51742	0.0785573	6.58653	4.50229e-11	6.27186e-09	5.49019e-06	DKO-WT
Snhg12	Proliferating cDC1s	397.754	0.687554	0.109376	6.28612	3.25495e-10	4.2142e-08	3.96625e-05	DKO-WT
Gpt2	Proliferating cDC1s	38.1962	2.20819	0.363697	6.07151	1.26712e-09	1.46786e-07	0.000154292	DKO-WT
Ddit4	Proliferating cDC1s	33.6307	2.56639	0.423496	6.06002	1.36105e-09	1.54416e-07	0.000165717	DKO-WT
Slc6a9	Proliferating cDC1s	20.0349	3.8007	0.637189	5.96479	2.44947e-09	2.72288e-07	0.000298155	DKO-WT
Gpr141	Proliferating cDC1s	283.297	0.78124	0.132551	5.89387	3.77246e-09	4.15159e-07	0.000459093	DKO-WT
Ghitm	Proliferating cDC1s	961.191	0.423007	0.0719913	5.87581	4.20791e-09	4.58495e-07	0.000512052	DKO-WT
Ifrd1	Proliferating cDC1s	680.225	0.52296	0.0922192	5.67084	1.42101e-08	1.4347e-06	0.00172768	DKO-WT
Mars	Proliferating cDC1s	313.156	0.673893	0.12016	5.60832	2.04301e-08	1.98968e-06	0.00248328	DKO-WT
Sel1l	Proliferating cDC1s	423.381	0.652508	0.116768	5.58807	2.29608e-08	2.19725e-06	0.00279064	DKO-WT
Pycr1	Proliferating cDC1s	23.2524	2.59752	0.466212	5.57154	2.52491e-08	2.37492e-06	0.00306849	DKO-WT
Chchd10	Proliferating cDC1s	50.8471	1.5856	0.286607	5.53232	3.16026e-08	2.94735e-06	0.00383997	DKO-WT
Eprs	Proliferating cDC1s	969.31	0.412689	0.0767934	5.37402	7.70016e-08	6.72542e-06	0.00935015	DKO-WT
Sept11	Proliferating cDC1s	336.293	0.595513	0.113209	5.26031	1.43811e-07	1.19897e-05	0.0174532	DKO-WT
Hspa9	Proliferating cDC1s	816.318	0.448583	0.0863499	5.19494	2.04784e-07	1.64499e-05	0.0248413	DKO-WT
Soat2	Proliferating cDC1s	24.6138	2.48563	0.479034	5.18884	2.11604e-07	1.68747e-05	0.025668	DKO-WT
1110038B12Rik	Proliferating cDC1s	293.456	0.594235	0.117436	5.06006	4.19128e-07	3.18104e-05	0.0508058	DKO-WT
Ccnd2	Proliferating cDC1s	44.4639	1.54537	0.309339	4.99571	5.86204e-07	4.30078e-05	0.0710374	DKO-WT
Vegfa	Proliferating cDC1s	14.3269	3.25532	0.66592	4.88845	1.01631e-06	7.12388e-05	0.123089	DKO-WT
Hpgd	Proliferating cDC1s	212.945	0.811243	0.166189	4.88145	1.05307e-06	7.33484e-05	0.127534	DKO-WT
Hax1	Proliferating cDC1s	308.07	0.564368	0.11596	4.86694	1.13342e-06	7.84481e-05	0.137247	DKO-WT
Cebpg	Proliferating cDC1s	378.002	0.61597	0.129201	4.76754	1.86492e-06	0.000125143	0.225669	DKO-WT
AC147806.2	Proliferating cDC1s	80.6221	1.13182	0.238082	4.75389	1.99536e-06	0.000133085	0.241441	DKO-WT
Rnf130	Proliferating cDC1s	575.044	0.416989	0.0893738	4.66567	3.07615e-06	0.00019126	0.371962	DKO-WT
Ccnd3	Proliferating cDC1s	1147.26	0.433419	0.0935996	4.63057	3.64668e-06	0.000224199	0.440839	DKO-WT
Snhg6	Proliferating cDC1s	652.734	0.412181	0.0895206	4.60432	4.13823e-06	0.000248859	0.500188	DKO-WT
Cdk6	Proliferating cDC1s	284.757	0.56984	0.123968	4.59665	4.29328e-06	0.000255521	0.518903	DKO-WT
Atp2a2	Proliferating cDC1s	689.027	0.423174	0.0932704	4.53707	5.70424e-06	0.000332144	0.689078	DKO-WT
Slc1a5	Proliferating cDC1s	394.448	0.476059	0.107568	4.42565	9.61519e-06	0.000508727	1	DKO-WT
Creld1	Proliferating cDC1s	64.675	1.03609	0.237307	4.36602	1.26531e-05	0.000644662	1	DKO-WT
Inpp4b	Proliferating cDC1s	25.636	1.73494	0.398116	4.35788	1.31328e-05	0.000659939	1	DKO-WT
Gbp8	Proliferating cDC1s	39.5553	1.52879	0.352314	4.33927	1.42957e-05	0.000715108	1	DKO-WT
Rassf8	Proliferating cDC1s	21.0774	2.17384	0.503892	4.3141	1.60256e-05	0.000794421	1	DKO-WT
Mtss1	Proliferating cDC1s	53.6076	1.13069	0.267521	4.22656	2.37295e-05	0.001116	1	DKO-WT
Jdp2	Proliferating cDC1s	338.706	1.19241	0.285513	4.17637	2.96195e-05	0.00133591	1	DKO-WT
Zfas1	Proliferating cDC1s	423.447	0.436849	0.106627	4.09698	4.18581e-05	0.00177856	1	DKO-WT
Serpinb10	Proliferating cDC1s	439.87	0.476645	0.117343	4.06196	4.86618e-05	0.00203083	1	DKO-WT
Ccdc117	Proliferating cDC1s	148.125	0.669161	0.164856	4.05906	4.92711e-05	0.00204615	1	DKO-WT
Snhg5	Proliferating cDC1s	153.664	0.630784	0.156993	4.01792	5.87145e-05	0.00240206	1	DKO-WT
Sell	Proliferating cDC1s	305.055	0.549532	0.137417	3.99901	6.36093e-05	0.00254553	1	DKO-WT
Hmbs	Proliferating cDC1s	278.208	0.502282	0.125687	3.9963	6.43393e-05	0.00255615	1	DKO-WT
Gm43890	Proliferating cDC1s	45.342	1.18901	0.301918	3.9382	8.20961e-05	0.00314797	1	DKO-WT
Ppp1r15b	Proliferating cDC1s	431.258	0.426512	0.109075	3.91027	9.21943e-05	0.00347465	1	DKO-WT
Tmem238	Proliferating cDC1s	431.53	0.42002	0.108674	3.86494	0.000111114	0.00408967	1	DKO-WT
Cdkn1a	Proliferating cDC1s	220.437	0.529619	0.137375	3.85529	0.000115594	0.00422829	1	DKO-WT
Ifi203	Proliferating cDC1s	238.266	0.571076	0.148408	3.848	0.000119085	0.00432519	1	DKO-WT
Mndal	Proliferating cDC1s	327.885	0.4835	0.129697	3.72792	0.000193063	0.00663957	1	DKO-WT
Lmo1	Proliferating cDC1s	294.563	0.434507	0.117291	3.70451	0.000211804	0.00719414	1	DKO-WT
Mthfd1l	Proliferating cDC1s	148.929	0.638556	0.174214	3.66535	0.000247001	0.00828732	1	DKO-WT
Sesn2	Proliferating cDC1s	110.937	0.675389	0.185743	3.63614	0.000276755	0.00909161	1	DKO-WT
Resf1	Proliferating cDC1s	397.237	0.40289	0.111126	3.62552	0.00028838	0.00941728	1	DKO-WT
Nrp1	Proliferating cDC1s	132.235	0.671559	0.191983	3.49801	0.000468738	0.0141716	1	DKO-WT
Herpud1	Proliferating cDC1s	3268.34	0.643026	0.185913	3.45874	0.000542715	0.0160123	1	DKO-WT
Slc38a7	Proliferating cDC1s	35.0547	1.1489	0.333252	3.44756	0.000565682	0.0165567	1	DKO-WT
Pdxk	Proliferating cDC1s	273.489	0.459272	0.134025	3.42677	0.000610811	0.017643	1	DKO-WT
Pag1	Proliferating cDC1s	91.7308	0.677219	0.198375	3.41384	0.000640553	0.0181683	1	DKO-WT
Nob1	Proliferating cDC1s	218.314	0.445234	0.132059	3.37147	0.00074769	0.0206742	1	DKO-WT
Ryr1	Proliferating cDC1s	228.059	0.462433	0.141543	3.26708	0.00108664	0.0286775	1	DKO-WT
Slc7a5	Proliferating cDC1s	49.9573	0.899702	0.275657	3.26384	0.00109911	0.0289372	1	DKO-WT
Sco2	Proliferating cDC1s	157.066	0.512668	0.15738	3.25751	0.00112393	0.0294725	1	DKO-WT
Arl11	Proliferating cDC1s	97.6424	0.62652	0.196423	3.18965	0.00142446	0.0361202	1	DKO-WT
Dynll1	Proliferating cDC1s	2978.8	0.483004	0.151792	3.182	0.0014626	0.0369172	1	DKO-WT
Pex11a	Proliferating cDC1s	48.189	1.03228	0.329446	3.13339	0.00172799	0.042638	1	DKO-WT
Lman2l	Proliferating cDC1s	192.761	0.466496	0.150633	3.09691	0.00195549	0.0469872	1	DKO-WT
Gm1966	Proliferating cDC1s	163.272	0.494658	0.159826	3.09498	0.00196828	0.0470889	1	DKO-WT
Icosl	Proliferating cDC1s	227.095	0.418464	0.135624	3.08547	0.00203228	0.0480974	1	DKO-WT

## Sheet: Early immature cDC1s_DOWN
gene	cluster_id	baseMean	logFC	lfcSE	stat	p_val	p_adj.loc	p_adj.glb	contrast
Sec61b	Early immature cDC1s	6204.87	-1.09353	0.0512612	-21.3326	5.65912e-101	2.98943e-97	6.94414e-96	DKO-WT
Crip1	Early immature cDC1s	8337.19	-0.771928	0.0471637	-16.367	3.29035e-60	4.34532e-57	4.03667e-55	DKO-WT
Ost4	Early immature cDC1s	2231.98	-0.808827	0.0576783	-14.0231	1.12623e-44	1.0817e-41	1.38132e-39	DKO-WT
mt-Rnr2	Early immature cDC1s	27655.7	-0.582415	0.0442733	-13.155	1.59286e-39	1.1219e-36	1.95334e-34	DKO-WT
Tmem258	Early immature cDC1s	1770.75	-0.824099	0.0678658	-12.1431	6.2437e-34	2.9984e-31	7.65522e-29	DKO-WT
S100a11	Early immature cDC1s	6967.55	-0.577843	0.0483805	-11.9437	7.0027e-33	2.95934e-30	8.58531e-28	DKO-WT
Dnajb9	Early immature cDC1s	343.229	-1.46622	0.12579	-11.6561	2.13681e-31	7.52514e-29	2.61952e-26	DKO-WT
Cope	Early immature cDC1s	1398.13	-0.819229	0.0720655	-11.3678	6.04714e-30	1.87906e-27	7.41247e-25	DKO-WT
Nucb2	Early immature cDC1s	433.329	-1.32193	0.11635	-11.3616	6.4929e-30	1.95993e-27	7.95874e-25	DKO-WT
Ostc	Early immature cDC1s	1645.73	-0.751537	0.068088	-11.0377	2.51303e-28	7.17573e-26	3.08015e-23	DKO-WT
Tram1	Early immature cDC1s	794.939	-0.880019	0.0835058	-10.5384	5.74583e-26	1.51762e-23	7.04111e-21	DKO-WT
Spcs2	Early immature cDC1s	2092.48	-0.720409	0.0685969	-10.5021	8.45171e-26	2.17786e-23	1.03567e-20	DKO-WT
Serf2	Early immature cDC1s	5059.54	-0.522962	0.0512983	-10.1945	2.09756e-24	5.15366e-22	2.57008e-19	DKO-WT
Snd1	Early immature cDC1s	358.205	-1.1838	0.116185	-10.1889	2.22193e-24	5.33517e-22	2.72245e-19	DKO-WT
Ssr2	Early immature cDC1s	1186.9	-0.765975	0.0754012	-10.1587	3.03232e-24	7.11921e-22	3.71526e-19	DKO-WT
Bet1	Early immature cDC1s	272.862	-1.20744	0.123966	-9.7401	2.03347e-22	4.05351e-20	2.49088e-17	DKO-WT
Serp1	Early immature cDC1s	2138.82	-0.672225	0.0697955	-9.63135	5.8948e-22	1.15331e-19	7.22001e-17	DKO-WT
CT010467.1	Early immature cDC1s	949.375	-0.810128	0.0853698	-9.48962	2.31868e-21	4.2977e-19	2.83955e-16	DKO-WT
Ssr1	Early immature cDC1s	911.636	-0.701916	0.0741703	-9.46357	2.97606e-21	5.42104e-19	3.64448e-16	DKO-WT
Rpl36al	Early immature cDC1s	2958.67	-0.525158	0.0564454	-9.30381	1.35499e-20	2.42636e-18	1.65916e-15	DKO-WT
Nucb1	Early immature cDC1s	524.545	-1.0081	0.109942	-9.16939	4.75723e-20	8.10647e-18	5.82447e-15	DKO-WT
mt-Rnr1	Early immature cDC1s	6988.73	-0.486222	0.0535329	-9.08267	1.05941e-19	1.72195e-17	1.29703e-14	DKO-WT
Sec61a1	Early immature cDC1s	608.855	-0.774732	0.086629	-8.9431	3.78391e-19	6.05712e-17	4.63203e-14	DKO-WT
Cks1b	Early immature cDC1s	482.459	-0.87128	0.0983158	-8.86205	7.85532e-19	1.23868e-16	9.61539e-14	DKO-WT
Tmed2	Early immature cDC1s	1589.58	-0.582266	0.0658636	-8.84049	9.53003e-19	1.48066e-16	1.16649e-13	DKO-WT
Surf4	Early immature cDC1s	707.107	-0.727546	0.0828669	-8.7797	1.63911e-18	2.50974e-16	2.00624e-13	DKO-WT
Ppib	Early immature cDC1s	6661.82	-0.474434	0.0543566	-8.72818	2.58811e-18	3.9062e-16	3.16759e-13	DKO-WT
Mydgf	Early immature cDC1s	697.623	-0.736624	0.0853118	-8.63449	5.89887e-18	8.5372e-16	7.21886e-13	DKO-WT
P4hb	Early immature cDC1s	1491.32	-0.57288	0.0681999	-8.40001	4.46432e-17	6.206e-15	5.46246e-12	DKO-WT
Cdk5rap3	Early immature cDC1s	420.167	-0.838313	0.102168	-8.20521	2.30191e-16	3.07844e-14	2.81602e-11	DKO-WT
Ssr4	Early immature cDC1s	5600.42	-0.481087	0.0586497	-8.20272	2.35014e-16	3.10366e-14	2.875e-11	DKO-WT
Sec61g	Early immature cDC1s	359.548	-0.921925	0.112856	-8.16904	3.10857e-16	4.05457e-14	3.80259e-11	DKO-WT
Sec11c	Early immature cDC1s	3401.39	-0.447148	0.0557028	-8.02738	9.95729e-16	1.26746e-13	1.21784e-10	DKO-WT
Stt3a	Early immature cDC1s	551.721	-0.73083	0.0914709	-7.98976	1.35207e-15	1.70055e-13	1.65361e-10	DKO-WT
Hspa13	Early immature cDC1s	134.298	-1.36668	0.171577	-7.96543	1.64653e-15	2.02275e-13	2.01365e-10	DKO-WT
Ddost	Early immature cDC1s	1466.76	-0.564688	0.07094	-7.96008	1.71928e-15	2.08784e-13	2.10259e-10	DKO-WT
Creb3l2	Early immature cDC1s	51.1741	-2.35441	0.298027	-7.89999	2.7893e-15	3.25951e-13	3.41076e-10	DKO-WT
Trappc1	Early immature cDC1s	681.804	-0.660567	0.0836248	-7.89918	2.80753e-15	3.25951e-13	3.43302e-10	DKO-WT
Lman1	Early immature cDC1s	393.51	-0.810164	0.103016	-7.86442	3.70813e-15	4.21251e-13	4.53393e-10	DKO-WT
Ufsp2	Early immature cDC1s	349.771	-0.843039	0.107627	-7.83297	4.76486e-15	5.29902e-13	5.82566e-10	DKO-WT
Edem2	Early immature cDC1s	352.045	-0.844529	0.109381	-7.72102	1.15404e-14	1.25695e-12	1.41075e-09	DKO-WT
Ckb	Early immature cDC1s	4924.57	-0.488074	0.0632664	-7.71459	1.21374e-14	1.30849e-12	1.4837e-09	DKO-WT
Smim14	Early immature cDC1s	1248.39	-0.541431	0.0707403	-7.65379	1.95138e-14	2.02121e-12	2.38509e-09	DKO-WT
Dad1	Early immature cDC1s	2372.63	-0.430952	0.0562975	-7.6549	1.93459e-14	2.02121e-12	2.36459e-09	DKO-WT
Tmed9	Early immature cDC1s	1652.01	-0.479897	0.0628383	-7.63702	2.22315e-14	2.25842e-12	2.71718e-09	DKO-WT
Dkk3	Early immature cDC1s	75.7154	-1.80912	0.237822	-7.60705	2.80426e-14	2.76888e-12	3.4272e-09	DKO-WT
Plpp5	Early immature cDC1s	73.1539	-1.78369	0.234421	-7.60892	2.76403e-14	2.76888e-12	3.37812e-09	DKO-WT
Ndufa4	Early immature cDC1s	3818.91	-0.418421	0.0551472	-7.58734	3.26528e-14	3.19423e-12	3.99056e-09	DKO-WT
Cd9	Early immature cDC1s	3227.9	-0.466876	0.0620934	-7.51893	5.52271e-14	5.30431e-12	6.74875e-09	DKO-WT
Tmed3	Early immature cDC1s	958.72	-0.614916	0.0827757	-7.42871	1.09664e-13	1.02531e-11	1.33993e-08	DKO-WT
Ufc1	Early immature cDC1s	1240.86	-0.517482	0.0698046	-7.41329	1.23206e-13	1.13872e-11	1.50534e-08	DKO-WT
Mgat2	Early immature cDC1s	705.438	-0.610633	0.082379	-7.41249	1.23949e-13	1.13872e-11	1.5144e-08	DKO-WT
BC028528	Early immature cDC1s	2447.52	-0.490666	0.0662086	-7.41091	1.25433e-13	1.14241e-11	1.53251e-08	DKO-WT
Rnase6	Early immature cDC1s	2975.94	-0.472259	0.0638111	-7.40089	1.35279e-13	1.22156e-11	1.6528e-08	DKO-WT
Srp9	Early immature cDC1s	2129.65	-0.442385	0.0599285	-7.38189	1.56057e-13	1.37395e-11	1.9065e-08	DKO-WT
Gm10177	Early immature cDC1s	151.223	-1.18688	0.160776	-7.38219	1.55707e-13	1.37395e-11	1.90224e-08	DKO-WT
Cd68	Early immature cDC1s	1149.48	-0.528128	0.0723013	-7.30454	2.7822e-13	2.37048e-11	3.39821e-08	DKO-WT
Dbi	Early immature cDC1s	1809.96	-0.439335	0.0604495	-7.2678	3.65393e-13	3.0883e-11	4.46258e-08	DKO-WT
Cyb5a	Early immature cDC1s	5133.04	-0.457131	0.0629467	-7.2622	3.80834e-13	3.19326e-11	4.65109e-08	DKO-WT
Scp2	Early immature cDC1s	1372.45	-0.505719	0.0704034	-7.18316	6.81161e-13	5.57865e-11	8.31786e-08	DKO-WT
Sec24d	Early immature cDC1s	84.6386	-1.56183	0.218765	-7.13929	9.38135e-13	7.62415e-11	1.14555e-07	DKO-WT
Lars2	Early immature cDC1s	501.438	-0.767782	0.108082	-7.10371	1.21455e-12	9.79524e-11	1.48293e-07	DKO-WT
Treml4	Early immature cDC1s	1006.95	-0.538583	0.0759192	-7.09416	1.30139e-12	1.04161e-10	1.58894e-07	DKO-WT
Hdlbp	Early immature cDC1s	1000.21	-0.526903	0.0743797	-7.08397	1.40085e-12	1.11278e-10	1.71035e-07	DKO-WT
Rtl8a	Early immature cDC1s	675.559	-0.585828	0.0830238	-7.05614	1.71188e-12	1.3497e-10	2.0899e-07	DKO-WT
Selenom	Early immature cDC1s	91.4323	-1.50997	0.214783	-7.0302	2.06245e-12	1.61406e-10	2.51778e-07	DKO-WT
1810058I24Rik	Early immature cDC1s	1210.41	-0.493379	0.0704504	-7.00322	2.50149e-12	1.94326e-10	3.05357e-07	DKO-WT
Sec31a	Early immature cDC1s	522.676	-0.631081	0.0904943	-6.97371	3.08692e-12	2.38053e-10	3.76798e-07	DKO-WT
Tmed10	Early immature cDC1s	1966.02	-0.441885	0.0634996	-6.95886	3.43034e-12	2.58868e-10	4.187e-07	DKO-WT
Selenof	Early immature cDC1s	1700.18	-0.430997	0.0625134	-6.89447	5.40666e-12	4.02263e-10	6.59801e-07	DKO-WT
Rrbp1	Early immature cDC1s	2266.99	-0.419361	0.061016	-6.87297	6.2881e-12	4.61346e-10	7.6733e-07	DKO-WT
Ubl5	Early immature cDC1s	3238.36	-0.407575	0.0594537	-6.85534	7.11429e-12	5.14811e-10	8.681e-07	DKO-WT
Cd48	Early immature cDC1s	1665.03	-0.432814	0.0632652	-6.84128	7.84913e-12	5.64123e-10	9.57742e-07	DKO-WT
Txndc11	Early immature cDC1s	190.641	-0.959826	0.140355	-6.83853	8.00086e-12	5.71143e-10	9.76225e-07	DKO-WT
Mir6236	Early immature cDC1s	432.652	-0.723583	0.106268	-6.80903	9.82563e-12	6.96697e-10	1.19879e-06	DKO-WT
Gorasp2	Early immature cDC1s	426.769	-0.694992	0.102535	-6.77812	1.21749e-11	8.51839e-10	1.48531e-06	DKO-WT
Ufl1	Early immature cDC1s	298.889	-0.792242	0.12015	-6.5938	4.28721e-11	2.86673e-09	5.22816e-06	DKO-WT
Ift20	Early immature cDC1s	745.122	-0.557111	0.084515	-6.59186	4.34346e-11	2.88608e-09	5.29668e-06	DKO-WT
Itm2c	Early immature cDC1s	1684.87	-0.404096	0.0625655	-6.45878	1.05552e-10	6.88368e-09	1.2867e-05	DKO-WT
Mrps21	Early immature cDC1s	873.254	-0.484913	0.075618	-6.41267	1.42993e-10	9.21169e-09	1.74291e-05	DKO-WT
Copa	Early immature cDC1s	797.175	-0.483098	0.0767075	-6.29792	3.01658e-10	1.90839e-08	3.67591e-05	DKO-WT
Pianp	Early immature cDC1s	479.557	-0.591381	0.0940762	-6.28619	3.25344e-10	2.04599e-08	3.96445e-05	DKO-WT
Trf	Early immature cDC1s	409.439	-0.674048	0.107815	-6.25188	4.05538e-10	2.53521e-08	4.94095e-05	DKO-WT
Ndufa1	Early immature cDC1s	1178.5	-0.434872	0.0696597	-6.2428	4.298e-10	2.64002e-08	5.23629e-05	DKO-WT
F630028O10Rik	Early immature cDC1s	182.647	-0.989916	0.158964	-6.2273	4.74555e-10	2.89808e-08	5.78117e-05	DKO-WT
S100a13	Early immature cDC1s	951.351	-0.469044	0.0756494	-6.20023	5.63798e-10	3.36527e-08	6.86745e-05	DKO-WT
Igha	Early immature cDC1s	27.6514	-2.57976	0.42537	-6.06473	1.32174e-09	7.63072e-08	0.00016094	DKO-WT
Uba5	Early immature cDC1s	340.506	-0.676251	0.112534	-6.0093	1.86322e-09	1.04707e-07	0.000226829	DKO-WT
Rpn1	Early immature cDC1s	969.65	-0.450751	0.0754068	-5.97759	2.26462e-09	1.25265e-07	0.00027567	DKO-WT
Ttc39a	Early immature cDC1s	480.401	-0.581168	0.0973053	-5.97262	2.33467e-09	1.28467e-07	0.00028419	DKO-WT
Cbr3	Early immature cDC1s	395.376	-0.698799	0.117089	-5.96809	2.40043e-09	1.31402e-07	0.00029219	DKO-WT
Nans	Early immature cDC1s	401.69	-0.615759	0.103305	-5.96059	2.51332e-09	1.3617e-07	0.000305921	DKO-WT
Ear2	Early immature cDC1s	59.7772	-1.50198	0.252938	-5.93815	2.88254e-09	1.55378e-07	0.000350834	DKO-WT
Tmem39a	Early immature cDC1s	183.141	-0.848916	0.144036	-5.89379	3.77428e-09	2.00378e-07	0.000459311	DKO-WT
Ccr2	Early immature cDC1s	419.563	-0.752105	0.127767	-5.88652	3.94416e-09	2.0835e-07	0.000479972	DKO-WT
Tmem256	Early immature cDC1s	1060.66	-0.433131	0.0736839	-5.87824	4.1466e-09	2.17954e-07	0.0005046	DKO-WT
Uap1	Early immature cDC1s	210.123	-0.784366	0.134067	-5.85054	4.89987e-09	2.55011e-07	0.000596217	DKO-WT
Txndc5	Early immature cDC1s	424.463	-0.580499	0.101701	-5.7079	1.14376e-08	5.86592e-07	0.00139089	DKO-WT
Tlr12	Early immature cDC1s	327.116	-0.625788	0.110378	-5.66949	1.43221e-08	7.17122e-07	0.00174128	DKO-WT
Dap	Early immature cDC1s	518.304	-0.526692	0.0937612	-5.61738	1.9387e-08	9.52669e-07	0.00235665	DKO-WT
Cenpv	Early immature cDC1s	667.912	-0.469284	0.0836647	-5.60911	2.03368e-08	9.8559e-07	0.00247196	DKO-WT
Gm42418	Early immature cDC1s	23258.6	-0.939158	0.169586	-5.53795	3.06038e-08	1.44991e-06	0.00371873	DKO-WT
Eny2	Early immature cDC1s	751.274	-0.431802	0.0782963	-5.51497	3.48831e-08	1.63796e-06	0.0042383	DKO-WT
Edem1	Early immature cDC1s	350.303	-0.626224	0.113707	-5.50736	3.64262e-08	1.70284e-06	0.0044256	DKO-WT
Gmppa	Early immature cDC1s	198.488	-0.80999	0.147843	-5.47871	4.28445e-08	1.98532e-06	0.00520488	DKO-WT
Ccdc167	Early immature cDC1s	194.028	-0.797355	0.145958	-5.46291	4.68383e-08	2.15151e-06	0.00568983	DKO-WT
Itm2a	Early immature cDC1s	29.3299	-1.98951	0.370573	-5.36875	7.92835e-08	3.54928e-06	0.00962676	DKO-WT
Kdelr2	Early immature cDC1s	532.141	-0.511768	0.0954989	-5.35889	8.37363e-08	3.7328e-06	0.0101667	DKO-WT
Pdia5	Early immature cDC1s	1096.4	-0.448365	0.0841642	-5.32726	9.97063e-08	4.40752e-06	0.0121045	DKO-WT
Ufm1	Early immature cDC1s	655.846	-0.446289	0.0847018	-5.26895	1.3721e-07	5.96552e-06	0.0166526	DKO-WT
Gmppb	Early immature cDC1s	265.912	-0.636642	0.120864	-5.2674	1.38369e-07	5.99127e-06	0.016793	DKO-WT
Golgb1	Early immature cDC1s	384.786	-0.577011	0.110802	-5.20761	1.9129e-07	8.05172e-06	0.0232066	DKO-WT
Gm34084	Early immature cDC1s	877.765	-0.573217	0.110246	-5.19943	1.99897e-07	8.34749e-06	0.0242495	DKO-WT
Armcx2	Early immature cDC1s	45.6043	-1.50506	0.289691	-5.19538	2.04302e-07	8.49784e-06	0.0247831	DKO-WT
Erlec1	Early immature cDC1s	226.806	-0.689428	0.133242	-5.17425	2.28825e-07	9.40676e-06	0.0277549	DKO-WT
Copb1	Early immature cDC1s	678.319	-0.420001	0.0815544	-5.14995	2.6055e-07	1.05874e-05	0.0316008	DKO-WT
mt-Atp8	Early immature cDC1s	224.99	-0.660512	0.128539	-5.13862	2.76764e-07	1.11179e-05	0.0335649	DKO-WT
Zbtb8os	Early immature cDC1s	455.41	-0.492681	0.0962073	-5.12103	3.03864e-07	1.21144e-05	0.0368468	DKO-WT
Gm49599	Early immature cDC1s	338.669	-0.541599	0.108217	-5.00476	5.59328e-07	2.16458e-05	0.0677827	DKO-WT
9530059O14Rik	Early immature cDC1s	464.301	-0.525562	0.10541	-4.98587	6.16846e-07	2.37846e-05	0.074747	DKO-WT
Spcs3	Early immature cDC1s	491.913	-0.490802	0.0985111	-4.9822	6.28662e-07	2.41521e-05	0.0761775	DKO-WT
Dnajc3	Early immature cDC1s	1520.26	-0.413934	0.0849526	-4.87253	1.10176e-06	4.05578e-05	0.133417	DKO-WT
Sec23b	Early immature cDC1s	207.922	-0.669415	0.13759	-4.8653	1.14283e-06	4.19043e-05	0.138384	DKO-WT
Rnaseh2c	Early immature cDC1s	317.234	-0.547822	0.114235	-4.79559	1.62195e-06	5.78917e-05	0.196304	DKO-WT
Cnpy2	Early immature cDC1s	683.139	-0.410855	0.0859382	-4.78082	1.7458e-06	6.18937e-05	0.211271	DKO-WT
1600010M07Rik	Early immature cDC1s	517.457	-0.468986	0.098253	-4.77325	1.81279e-06	6.40538e-05	0.219371	DKO-WT
Vwf	Early immature cDC1s	171.252	-0.768411	0.162034	-4.74229	2.1132e-06	7.41727e-05	0.255676	DKO-WT
Rcn2	Early immature cDC1s	401.995	-0.470509	0.101277	-4.64575	3.38838e-06	0.000115478	0.409658	DKO-WT
Nfxl1	Early immature cDC1s	130.482	-0.770817	0.166215	-4.63746	3.52721e-06	0.000119823	0.426415	DKO-WT
Tmem214	Early immature cDC1s	192.924	-0.65372	0.142056	-4.60185	4.18765e-06	0.0001409	0.506157	DKO-WT
Sec63	Early immature cDC1s	496.235	-0.433283	0.0956909	-4.52795	5.95591e-06	0.00019421	0.719426	DKO-WT
Mrpl41	Early immature cDC1s	415.15	-0.458746	0.101638	-4.51353	6.37574e-06	0.000205993	0.770011	DKO-WT
I830077J02Rik	Early immature cDC1s	565.507	-0.417741	0.0930141	-4.49115	7.08386e-06	0.000226791	0.855369	DKO-WT
Cd207	Early immature cDC1s	119.604	-0.99971	0.224471	-4.45363	8.44316e-06	0.000267874	1	DKO-WT
Ifi27l2a	Early immature cDC1s	664.407	-0.533024	0.119924	-4.44469	8.80182e-06	0.000277586	1	DKO-WT
Uso1	Early immature cDC1s	365.759	-0.477614	0.108078	-4.41915	9.9088e-06	0.000307901	1	DKO-WT
Mcee	Early immature cDC1s	258.256	-0.539971	0.122802	-4.39707	1.09722e-05	0.000336005	1	DKO-WT
Stmn1	Early immature cDC1s	325.694	-0.484138	0.111797	-4.33051	1.48767e-05	0.000450349	1	DKO-WT
Gfpt1	Early immature cDC1s	623.466	-0.42782	0.0988615	-4.32747	1.50833e-05	0.000455301	1	DKO-WT
Hsd17b4	Early immature cDC1s	364.774	-0.468068	0.108478	-4.31485	1.59713e-05	0.000478007	1	DKO-WT
Ms4a6c	Early immature cDC1s	416.049	-0.483999	0.112207	-4.31345	1.60724e-05	0.000479676	1	DKO-WT
Tmem248	Early immature cDC1s	259.588	-0.540058	0.125382	-4.30729	1.6527e-05	0.000491359	1	DKO-WT
Tspyl2	Early immature cDC1s	76.2733	-0.935104	0.217396	-4.30138	1.69739e-05	0.000500921	1	DKO-WT
Prss57	Early immature cDC1s	58.8043	-1.11377	0.260173	-4.2809	1.86138e-05	0.000543246	1	DKO-WT
Aldh9a1	Early immature cDC1s	384.22	-0.469558	0.110116	-4.26419	2.00624e-05	0.000582306	1	DKO-WT
Sec24c	Early immature cDC1s	230.962	-0.564876	0.13334	-4.23636	2.27172e-05	0.000648669	1	DKO-WT
Dynlt1f	Early immature cDC1s	405.068	-0.455706	0.107867	-4.22472	2.39236e-05	0.000675808	1	DKO-WT
Map2k6	Early immature cDC1s	410.334	-0.471805	0.112017	-4.21193	2.53201e-05	0.000711456	1	DKO-WT
Fmo5	Early immature cDC1s	133.607	-0.752763	0.178979	-4.20586	2.60086e-05	0.000726935	1	DKO-WT
Yipf5	Early immature cDC1s	307.118	-0.473434	0.112731	-4.19966	2.67312e-05	0.000743197	1	DKO-WT
Clnk	Early immature cDC1s	97.8126	-0.82369	0.201196	-4.09396	4.24064e-05	0.00111541	1	DKO-WT
Mxd4	Early immature cDC1s	466.749	-0.414814	0.101633	-4.08148	4.47508e-05	0.00116739	1	DKO-WT
Utrn	Early immature cDC1s	196.437	-0.642543	0.158587	-4.05168	5.08507e-05	0.00130082	1	DKO-WT
Cpq	Early immature cDC1s	383.364	-0.4198	0.10392	-4.03963	5.35356e-05	0.00135766	1	DKO-WT
Idh2	Early immature cDC1s	483.01	-0.416223	0.104717	-3.97475	7.04536e-05	0.00172701	1	DKO-WT
Gm43305	Early immature cDC1s	296.76	-0.63109	0.159009	-3.96888	7.22101e-05	0.00176189	1	DKO-WT
Hbb-bs	Early immature cDC1s	37.9103	-4.10545	1.035	-3.96663	7.28974e-05	0.00177456	1	DKO-WT
Rpa3	Early immature cDC1s	377.557	-0.420518	0.106032	-3.96595	7.31043e-05	0.00177551	1	DKO-WT
Dipk1a	Early immature cDC1s	444.346	-0.40364	0.103071	-3.91613	8.99801e-05	0.00213627	1	DKO-WT
Ero1lb	Early immature cDC1s	417.348	-0.402595	0.103729	-3.88122	0.000103934	0.00241333	1	DKO-WT
Fkbp1b	Early immature cDC1s	51.6437	-1.03083	0.266742	-3.86453	0.000111305	0.0025564	1	DKO-WT
Fnta	Early immature cDC1s	344.512	-0.423894	0.110349	-3.84138	0.000122343	0.00277372	1	DKO-WT
Tex9	Early immature cDC1s	159.676	-0.582567	0.151643	-3.84171	0.00012218	0.00277372	1	DKO-WT
Tnfrsf23	Early immature cDC1s	34.2257	-1.28633	0.335913	-3.82935	0.000128484	0.00289432	1	DKO-WT
Cacna1e	Early immature cDC1s	366.58	-0.42161	0.110769	-3.8062	0.000141117	0.00313873	1	DKO-WT
Gprc5c	Early immature cDC1s	98.0613	-0.743777	0.19592	-3.79633	0.000146857	0.00322565	1	DKO-WT
Gm9530	Early immature cDC1s	246.681	-0.488363	0.129016	-3.78529	0.000153529	0.00334485	1	DKO-WT
Igsf6	Early immature cDC1s	221.152	-0.520611	0.137574	-3.78423	0.000154183	0.00334485	1	DKO-WT
Dpagt1	Early immature cDC1s	176.146	-0.541507	0.143713	-3.76798	0.000164576	0.00351974	1	DKO-WT
Spata13	Early immature cDC1s	85.5774	-0.772289	0.205665	-3.75509	0.000173281	0.00366142	1	DKO-WT
Tmem141	Early immature cDC1s	304.878	-0.469617	0.125419	-3.74437	0.000180846	0.00381365	1	DKO-WT
Stx5a	Early immature cDC1s	356.656	-0.433951	0.116424	-3.72732	0.000193525	0.00405673	1	DKO-WT
Cdkn2c	Early immature cDC1s	68.1492	-0.852098	0.228869	-3.72309	0.000196803	0.00411727	1	DKO-WT
Carhsp1	Early immature cDC1s	62.9085	-0.891137	0.239957	-3.71373	0.000204225	0.00424875	1	DKO-WT
Bvht	Early immature cDC1s	22.5698	-1.52296	0.410097	-3.71365	0.000204294	0.00424875	1	DKO-WT
Slc33a1	Early immature cDC1s	189.723	-0.538578	0.145212	-3.7089	0.000208165	0.00432075	1	DKO-WT
Armcx3	Early immature cDC1s	93.0477	-0.801163	0.216315	-3.70368	0.000212494	0.00440196	1	DKO-WT
B230307C23Rik	Early immature cDC1s	237.017	-0.457992	0.1265	-3.62048	0.000294055	0.00589505	1	DKO-WT
Chil5	Early immature cDC1s	108.955	-0.659104	0.182735	-3.60688	0.0003099	0.00617754	1	DKO-WT
Gcc2	Early immature cDC1s	269.293	-0.441488	0.12352	-3.57423	0.000351258	0.00688504	1	DKO-WT
Ms4a6b	Early immature cDC1s	156.924	-0.554742	0.15561	-3.56495	0.000363922	0.00710691	1	DKO-WT
Copg1	Early immature cDC1s	277.195	-0.405476	0.116691	-3.47478	0.000511271	0.00949311	1	DKO-WT
Dnase1l3	Early immature cDC1s	4683.78	-0.459583	0.132573	-3.46663	0.000527036	0.0097345	1	DKO-WT
2900026A02Rik	Early immature cDC1s	18.2839	-1.57836	0.45599	-3.46139	0.000537396	0.00989127	1	DKO-WT
Prrc1	Early immature cDC1s	268.762	-0.452814	0.131406	-3.44591	0.00056913	0.0103492	1	DKO-WT
Gm47135	Early immature cDC1s	125.328	-0.607121	0.176729	-3.43533	0.000591835	0.010652	1	DKO-WT
Dtd2	Early immature cDC1s	85.4356	-0.700876	0.204178	-3.43268	0.000597651	0.0107202	1	DKO-WT
Eif2ak3	Early immature cDC1s	83.1336	-0.723793	0.211307	-3.42532	0.000614081	0.0109511	1	DKO-WT
Fam114a1	Early immature cDC1s	46.2075	-0.939455	0.276657	-3.39574	0.000684438	0.0118737	1	DKO-WT
Atg13	Early immature cDC1s	92.5013	-0.685551	0.20232	-3.38845	0.000702884	0.0121339	1	DKO-WT
Flt1	Early immature cDC1s	174.329	-0.527734	0.155869	-3.38576	0.000709821	0.0122138	1	DKO-WT
Isoc2b	Early immature cDC1s	108.26	-0.60666	0.179911	-3.372	0.000746236	0.0126752	1	DKO-WT
Yipf2	Early immature cDC1s	63.1702	-0.804521	0.238735	-3.36993	0.000751869	0.0127504	1	DKO-WT
Iglc2	Early immature cDC1s	14.0679	-2.00905	0.605296	-3.31912	0.000903002	0.0147744	1	DKO-WT
Gm46224	Early immature cDC1s	111.433	-0.642121	0.193902	-3.31158	0.000927711	0.0151021	1	DKO-WT
Cxcr3	Early immature cDC1s	286.282	-0.413717	0.125411	-3.29888	0.0009707	0.0157051	1	DKO-WT
Capn7	Early immature cDC1s	178.49	-0.514882	0.156709	-3.28559	0.00101768	0.0163153	1	DKO-WT
Ttll9	Early immature cDC1s	24.1476	-1.39574	0.426835	-3.26998	0.00107554	0.0171648	1	DKO-WT
Tuba1a	Early immature cDC1s	336.904	-0.485625	0.151004	-3.21597	0.00130006	0.0201988	1	DKO-WT
Creld2	Early immature cDC1s	866.962	-0.608664	0.189996	-3.20355	0.00135743	0.0207544	1	DKO-WT
Ptprs	Early immature cDC1s	214.359	-0.442969	0.139061	-3.18542	0.00144546	0.021785	1	DKO-WT
Gm5238	Early immature cDC1s	23.393	-1.22272	0.38788	-3.15231	0.00161981	0.0239013	1	DKO-WT
Arfgap3	Early immature cDC1s	67.4422	-0.778683	0.247429	-3.14709	0.00164902	0.024197	1	DKO-WT
Apoe	Early immature cDC1s	228.041	-0.475227	0.151221	-3.14259	0.00167461	0.0244706	1	DKO-WT
Lrrc1	Early immature cDC1s	197.019	-0.434615	0.138466	-3.13879	0.0016965	0.0246934	1	DKO-WT
St3gal6	Early immature cDC1s	55.9191	-0.844722	0.269486	-3.13457	0.00172107	0.024922	1	DKO-WT
Chid1	Early immature cDC1s	113.712	-0.545619	0.175578	-3.10756	0.00188638	0.0268232	1	DKO-WT
Gpr82	Early immature cDC1s	23.696	-1.24528	0.401714	-3.09992	0.0019357	0.0274505	1	DKO-WT
Tnf	Early immature cDC1s	110.168	-0.630792	0.203784	-3.09539	0.00196553	0.0278363	1	DKO-WT
Lig1	Early immature cDC1s	108.251	-0.603939	0.195422	-3.09043	0.00199865	0.0281543	1	DKO-WT
Plcxd2	Early immature cDC1s	33.1604	-1.00747	0.326087	-3.08959	0.00200435	0.0281971	1	DKO-WT
Hba-a1	Early immature cDC1s	18.0354	-3.85303	1.25419	-3.07214	0.00212529	0.0295055	1	DKO-WT
Sgk1	Early immature cDC1s	356.667	-0.430477	0.140447	-3.06505	0.00217635	0.0300958	1	DKO-WT
Mefv	Early immature cDC1s	169.8	-0.581048	0.189971	-3.05861	0.00222366	0.0304619	1	DKO-WT
Mccc2	Early immature cDC1s	85.0141	-0.639466	0.209698	-3.04945	0.00229257	0.0312529	1	DKO-WT
Sesn3	Early immature cDC1s	183.176	-0.44811	0.147025	-3.04785	0.00230484	0.0313179	1	DKO-WT
Cpd	Early immature cDC1s	72.0888	-0.67357	0.22124	-3.04452	0.00233051	0.0315705	1	DKO-WT
Rnu11	Early immature cDC1s	27.275	-1.07372	0.354403	-3.02965	0.00244835	0.0329095	1	DKO-WT
Tpm2	Early immature cDC1s	147.551	-0.517286	0.171767	-3.01156	0.00259912	0.0343246	1	DKO-WT
Idh1	Early immature cDC1s	101.425	-0.582888	0.193999	-3.00459	0.00265942	0.034913	1	DKO-WT
Ikbip	Early immature cDC1s	133.107	-0.512564	0.170599	-3.0045	0.0026602	0.034913	1	DKO-WT
Nudt22	Early immature cDC1s	122.405	-0.511007	0.1705	-2.99711	0.00272552	0.0356817	1	DKO-WT
Gm38410	Early immature cDC1s	75.1581	-0.658003	0.220603	-2.98275	0.00285676	0.0372462	1	DKO-WT
Cd7	Early immature cDC1s	37.5869	-0.900333	0.303088	-2.97053	0.00297282	0.0385373	1	DKO-WT
G6pc3	Early immature cDC1s	208.476	-0.40026	0.135052	-2.96374	0.00303925	0.0392059	1	DKO-WT
Skiv2l	Early immature cDC1s	146.725	-0.467523	0.157732	-2.96403	0.00303641	0.0392059	1	DKO-WT
Ide	Early immature cDC1s	173.762	-0.456036	0.154294	-2.95562	0.00312037	0.0399113	1	DKO-WT
Gm47938	Early immature cDC1s	15.6223	-1.52601	0.516307	-2.95563	0.00312033	0.0399113	1	DKO-WT
Map3k10	Early immature cDC1s	75.1745	-0.647963	0.220175	-2.94294	0.0032511	0.041383	1	DKO-WT
Gm38832	Early immature cDC1s	109.309	-0.525098	0.179031	-2.933	0.00335704	0.0425775	1	DKO-WT
Apol7c	Early immature cDC1s	1398.12	-0.809193	0.276582	-2.92569	0.00343694	0.0434345	1	DKO-WT
Polr3g	Early immature cDC1s	45.9341	-0.810206	0.279235	-2.90152	0.00371359	0.0463212	1	DKO-WT
Grap2	Early immature cDC1s	180.108	-0.4443	0.153489	-2.89467	0.00379556	0.0471212	1	DKO-WT
Galnt12	Early immature cDC1s	109.38	-0.533774	0.185162	-2.88274	0.00394227	0.0487136	1	DKO-WT
AW011738	Early immature cDC1s	88.8227	-0.589576	0.204749	-2.87951	0.00398298	0.0489874	1	DKO-WT

## Sheet: Early immature cDC1s_UP
gene	cluster_id	baseMean	logFC	lfcSE	stat	p_val	p_adj.loc	p_adj.glb	contrast
Mthfd2	Early immature cDC1s	2014.71	1.47806	0.0684891	21.581	2.71221e-103	2.86545e-99	3.32816e-98	DKO-WT
Atf5	Early immature cDC1s	380.659	3.55169	0.168406	21.09	9.82897e-99	3.46143e-95	1.20607e-93	DKO-WT
Ddit3	Early immature cDC1s	654.896	2.25187	0.10953	20.5593	6.3498e-94	1.67714e-90	7.79145e-89	DKO-WT
Asns	Early immature cDC1s	243.921	3.80097	0.214281	17.7382	2.12631e-70	4.49289e-67	2.60879e-65	DKO-WT
Eif4ebp1	Early immature cDC1s	1321.86	1.69217	0.0962461	17.5817	3.40297e-69	5.99206e-66	4.1751e-64	DKO-WT
Sars	Early immature cDC1s	1328.65	1.32345	0.0807833	16.3828	2.53866e-60	3.83157e-57	3.11451e-55	DKO-WT
Eif2s2	Early immature cDC1s	4156.69	0.908928	0.0580013	15.6708	2.39403e-55	2.81033e-52	2.9369e-50	DKO-WT
Hspa5	Early immature cDC1s	17911.4	1.04681	0.0701914	14.9137	2.68435e-50	2.83601e-47	3.29275e-45	DKO-WT
Cebpb	Early immature cDC1s	365.286	1.913	0.139556	13.7077	9.12538e-43	8.03413e-40	1.11917e-37	DKO-WT
Aars	Early immature cDC1s	466.954	1.40014	0.104786	13.3619	1.00996e-40	8.20785e-38	1.23859e-35	DKO-WT
Psat1	Early immature cDC1s	300.645	1.77714	0.134948	13.1691	1.32103e-39	9.96908e-37	1.62002e-34	DKO-WT
Shmt2	Early immature cDC1s	368.666	1.76434	0.134214	13.1458	1.79941e-39	1.18817e-36	2.20662e-34	DKO-WT
Pck2	Early immature cDC1s	217.721	2.06042	0.156977	13.1256	2.34938e-39	1.46007e-36	2.88102e-34	DKO-WT
Jdp2	Early immature cDC1s	694.528	1.44333	0.11171	12.9204	3.45482e-38	2.02779e-35	4.23651e-33	DKO-WT
Nars	Early immature cDC1s	1926.09	0.823883	0.0639418	12.8849	5.47641e-38	3.04517e-35	6.71539e-33	DKO-WT
Chac1	Early immature cDC1s	189.319	2.14005	0.17132	12.4915	8.30764e-36	4.38851e-33	1.01863e-30	DKO-WT
Cars	Early immature cDC1s	348.726	1.53	0.122871	12.4521	1.36283e-35	6.85635e-33	1.67101e-30	DKO-WT
Gars	Early immature cDC1s	763.175	1.15237	0.0959992	12.0039	3.38775e-33	1.55616e-30	4.15345e-28	DKO-WT
Snhg12	Early immature cDC1s	721.167	1.05655	0.0884334	11.9475	6.69424e-33	2.94686e-30	8.2072e-28	DKO-WT
Atf4	Early immature cDC1s	1981.43	0.848103	0.071412	11.8762	1.5737e-32	6.39468e-30	1.92931e-27	DKO-WT
Rgs1	Early immature cDC1s	2044.02	0.847043	0.0715758	11.8342	2.59742e-32	1.01636e-29	3.18431e-27	DKO-WT
Iars	Early immature cDC1s	586.136	1.16271	0.0989763	11.7474	7.28642e-32	2.74932e-29	8.93264e-27	DKO-WT
Calr	Early immature cDC1s	12742.8	0.629487	0.0536952	11.7233	9.67834e-32	3.52592e-29	1.18648e-26	DKO-WT
Yars	Early immature cDC1s	318.592	1.40076	0.120724	11.603	3.97854e-31	1.35591e-28	4.87721e-26	DKO-WT
Hsp90b1	Early immature cDC1s	10695.1	0.796438	0.0688806	11.5626	6.37636e-31	2.1052e-28	7.81659e-26	DKO-WT
Phgdh	Early immature cDC1s	766.59	2.608	0.225946	11.5426	8.04631e-31	2.57604e-28	9.86357e-26	DKO-WT
Arpc5l	Early immature cDC1s	2433.92	0.724429	0.0640694	11.3069	1.21247e-29	3.55826e-27	1.48617e-24	DKO-WT
Tars	Early immature cDC1s	506.903	1.03678	0.0961383	10.7842	4.08611e-27	1.13605e-24	5.00773e-22	DKO-WT
2410006H16Rik	Early immature cDC1s	3662.31	0.676856	0.0642261	10.5386	5.73163e-26	1.51762e-23	7.02377e-21	DKO-WT
Slc7a1	Early immature cDC1s	353.388	1.22073	0.116629	10.4668	1.22717e-25	3.08691e-23	1.50374e-20	DKO-WT
Slc1a4	Early immature cDC1s	76.3821	3.04333	0.30152	10.0933	5.91462e-24	1.33845e-21	7.24653e-19	DKO-WT
Ifrd1	Early immature cDC1s	857.92	0.884628	0.0876507	10.0926	5.95431e-24	1.33845e-21	7.2951e-19	DKO-WT
Psph	Early immature cDC1s	348.72	1.20324	0.119987	10.0281	1.14692e-23	2.52442e-21	1.40511e-18	DKO-WT
Hspa9	Early immature cDC1s	884.138	0.828599	0.0829835	9.98511	1.77108e-23	3.81867e-21	2.16973e-18	DKO-WT
Ghitm	Early immature cDC1s	1342.94	0.708521	0.0718315	9.86365	5.98359e-23	1.26433e-20	7.33007e-18	DKO-WT
Herpud1	Early immature cDC1s	5812.86	0.745582	0.0757311	9.84512	7.19501e-23	1.4905e-20	8.81396e-18	DKO-WT
Cox6a2	Early immature cDC1s	179.273	3.96413	0.406631	9.7487	1.8684e-22	3.79609e-20	2.28874e-17	DKO-WT
Lars	Early immature cDC1s	839.166	0.831782	0.0868328	9.57912	9.78746e-22	1.88008e-19	1.19872e-16	DKO-WT
Mars	Early immature cDC1s	298.326	1.15285	0.121149	9.51598	1.80012e-21	3.39613e-19	2.20458e-16	DKO-WT
Nfe2l2	Early immature cDC1s	856.135	0.742719	0.0804701	9.22974	2.71277e-20	4.77674e-18	3.32155e-15	DKO-WT
Cdkn1a	Early immature cDC1s	136.965	1.74644	0.190353	9.17474	4.52645e-20	7.83967e-18	5.54196e-15	DKO-WT
Trib3	Early immature cDC1s	62.8306	3.19187	0.34956	9.1311	6.78084e-20	1.13714e-17	8.30199e-15	DKO-WT
Gas5	Early immature cDC1s	6877.27	0.54613	0.0599284	9.11303	8.01105e-20	1.32245e-17	9.80801e-15	DKO-WT
Sel1l	Early immature cDC1s	708.483	0.807954	0.092741	8.71194	2.98713e-18	4.44494e-16	3.65592e-13	DKO-WT
Aldh18a1	Early immature cDC1s	197.355	1.39221	0.161199	8.63661	5.79049e-18	8.49674e-16	7.08629e-13	DKO-WT
Slc6a9	Early immature cDC1s	46.5883	3.91893	0.456934	8.57658	9.77333e-18	1.39534e-15	1.196e-12	DKO-WT
Slc38a2	Early immature cDC1s	1446.95	0.592462	0.0691275	8.57057	1.02974e-17	1.45056e-15	1.26013e-12	DKO-WT
Ubald2	Early immature cDC1s	1354.81	0.575619	0.0685462	8.39753	4.55953e-17	6.25603e-15	5.5789e-12	DKO-WT
Xpot	Early immature cDC1s	218.09	1.2976	0.15528	8.35654	6.45855e-17	8.74803e-15	7.90223e-12	DKO-WT
Ormdl2	Early immature cDC1s	706.641	0.676867	0.0832896	8.12667	4.41228e-16	5.68485e-14	5.3971e-11	DKO-WT
AC147806.2	Early immature cDC1s	143.199	1.42658	0.178667	7.98457	1.41009e-15	1.75266e-13	1.72455e-10	DKO-WT
Rcc2	Early immature cDC1s	794.762	0.626737	0.0788428	7.94921	1.87708e-15	2.25356e-13	2.29553e-10	DKO-WT
Slc3a2	Early immature cDC1s	2494.85	0.462719	0.0584263	7.91971	2.38069e-15	2.82606e-13	2.91125e-10	DKO-WT
Snhg1	Early immature cDC1s	1475.12	0.535648	0.0681452	7.86039	3.82942e-15	4.30402e-13	4.68212e-10	DKO-WT
Eprs	Early immature cDC1s	1241.71	0.651143	0.0838925	7.76163	8.38459e-15	9.22742e-13	1.02502e-09	DKO-WT
Nupr1	Early immature cDC1s	42.3037	3.20087	0.418513	7.64819	2.0382e-14	2.09064e-12	2.49119e-09	DKO-WT
Eif1	Early immature cDC1s	15513.7	0.459217	0.060748	7.55938	4.0499e-14	3.92543e-12	4.94926e-09	DKO-WT
Nktr	Early immature cDC1s	1545.78	0.513644	0.069048	7.43895	1.01491e-13	9.65989e-12	1.24009e-08	DKO-WT
Pfkp	Early immature cDC1s	1029.12	0.576846	0.0775795	7.43555	1.04134e-13	9.82296e-12	1.27238e-08	DKO-WT
Txnip	Early immature cDC1s	463.357	0.775872	0.105067	7.38453	1.52997e-13	1.36985e-11	1.86917e-08	DKO-WT
Slc1a5	Early immature cDC1s	479.516	0.796185	0.107919	7.3776	1.61174e-13	1.40728e-11	1.969e-08	DKO-WT
Eif3c	Early immature cDC1s	2618.14	0.451724	0.0613958	7.35756	1.87302e-13	1.62201e-11	2.28812e-08	DKO-WT
Gbp8	Early immature cDC1s	83.2329	1.66348	0.226992	7.32836	2.32993e-13	2.00128e-11	2.84594e-08	DKO-WT
Snhg6	Early immature cDC1s	1046.05	0.543409	0.0751103	7.23482	4.66157e-13	3.87792e-11	5.69285e-08	DKO-WT
Isyna1	Early immature cDC1s	1105.99	0.537151	0.0743162	7.22791	4.90495e-13	4.0485e-11	5.99002e-08	DKO-WT
Gpt2	Early immature cDC1s	62.9398	2.04941	0.293934	6.97236	3.11679e-12	2.38615e-10	3.80441e-07	DKO-WT
Mtss1	Early immature cDC1s	65.3931	1.82882	0.26673	6.85645	7.05917e-12	5.14346e-10	8.61388e-07	DKO-WT
Rasgef1b	Early immature cDC1s	1240.42	0.630958	0.0943704	6.68597	2.29392e-11	1.57372e-09	2.79797e-06	DKO-WT
Soat2	Early immature cDC1s	38.4112	2.49251	0.376522	6.61981	3.59662e-11	2.42028e-09	4.38623e-06	DKO-WT
Itgb2	Early immature cDC1s	1594.87	0.434021	0.066808	6.49654	8.21893e-11	5.39335e-09	1.002e-05	DKO-WT
Zc3h12c	Early immature cDC1s	299.045	0.833055	0.1297	6.42291	1.33692e-10	8.66534e-09	1.62958e-05	DKO-WT
Tent5c	Early immature cDC1s	1520.76	0.470272	0.073562	6.39287	1.62798e-10	1.0424e-08	1.98428e-05	DKO-WT
Gpr183	Early immature cDC1s	321.738	0.813126	0.127385	6.38321	1.7341e-10	1.10366e-08	2.11356e-05	DKO-WT
Zfp36	Early immature cDC1s	4703.22	0.410248	0.065654	6.24864	4.1404e-10	2.57313e-08	5.04445e-05	DKO-WT
Chchd10	Early immature cDC1s	76.4857	1.53158	0.247745	6.18208	6.3263e-10	3.75491e-08	7.70549e-05	DKO-WT
Ifitm3	Early immature cDC1s	3396.36	0.949951	0.15492	6.13187	8.6854e-10	5.09785e-08	0.000105779	DKO-WT
Tbcb	Early immature cDC1s	1905.2	0.402942	0.065841	6.11993	9.36176e-10	5.46447e-08	0.00011401	DKO-WT
Ier2	Early immature cDC1s	2535.63	0.416217	0.0686742	6.06075	1.35488e-09	7.7795e-08	0.000164968	DKO-WT
Ptger4	Early immature cDC1s	402.586	0.616748	0.102238	6.03246	1.61485e-09	9.22208e-08	0.000196608	DKO-WT
Ccnd2	Early immature cDC1s	55.3783	1.71613	0.284932	6.02294	1.71281e-09	9.72894e-08	0.000208531	DKO-WT
Pik3r1	Early immature cDC1s	1100.67	0.588785	0.0984593	5.97998	2.23159e-09	1.24088e-07	0.000271651	DKO-WT
Ybx3	Early immature cDC1s	919.47	0.518146	0.087446	5.92532	3.11682e-09	1.67153e-07	0.000379326	DKO-WT
Gm19327	Early immature cDC1s	265.253	0.920415	0.157512	5.84345	5.11303e-09	2.648e-07	0.000622128	DKO-WT
Pycr1	Early immature cDC1s	25.0865	2.83446	0.485195	5.84191	5.16068e-09	2.65964e-07	0.00062792	DKO-WT
Zfas1	Early immature cDC1s	1184.79	0.414274	0.072808	5.68995	1.27078e-08	6.45471e-07	0.00154522	DKO-WT
Egr2	Early immature cDC1s	496.782	0.739814	0.130306	5.67751	1.3667e-08	6.87583e-07	0.00166172	DKO-WT
Sqstm1	Early immature cDC1s	847.038	0.484987	0.0858079	5.65201	1.5858e-08	7.90282e-07	0.00192789	DKO-WT
Atp2a2	Early immature cDC1s	826.906	0.454338	0.0806266	5.63508	1.74974e-08	8.67887e-07	0.00212709	DKO-WT
Sesn2	Early immature cDC1s	156.918	0.905981	0.160804	5.63407	1.76001e-08	8.68901e-07	0.00213955	DKO-WT
Elmsan1	Early immature cDC1s	566.71	0.546585	0.0973962	5.61197	2.00037e-08	9.73911e-07	0.00243152	DKO-WT
Rassf8	Early immature cDC1s	38.2547	1.98438	0.354066	5.60456	2.08781e-08	1.0072e-06	0.00253767	DKO-WT
Hspd1	Early immature cDC1s	1672.94	0.476312	0.0854449	5.57449	2.48257e-08	1.1868e-06	0.00301707	DKO-WT
Mthfd1l	Early immature cDC1s	94.8617	1.1658	0.20911	5.57504	2.47472e-08	1.1868e-06	0.00300758	DKO-WT
Klf13	Early immature cDC1s	461.923	0.556008	0.101273	5.49017	4.01545e-08	1.86887e-06	0.00487837	DKO-WT
Hpgd	Early immature cDC1s	262.278	0.817086	0.149752	5.45625	4.86286e-08	2.22408e-06	0.00590712	DKO-WT
Dnajb11	Early immature cDC1s	1357.59	0.410607	0.0764463	5.37118	7.82223e-08	3.51899e-06	0.00949806	DKO-WT
Gtpbp2	Early immature cDC1s	274.139	0.717439	0.133575	5.37106	7.82737e-08	3.51899e-06	0.00950423	DKO-WT
Sept11	Early immature cDC1s	315.487	0.643687	0.12178	5.28568	1.25242e-07	5.51326e-06	0.0152015	DKO-WT
Manf	Early immature cDC1s	4919.23	0.424527	0.0810661	5.2368	1.63387e-07	6.98859e-06	0.019826	DKO-WT
Trp53cor1	Early immature cDC1s	17.5142	3.75414	0.717227	5.23425	1.6566e-07	7.05724e-06	0.0201012	DKO-WT
Gdf15	Early immature cDC1s	16.5848	4.22137	0.811821	5.19987	1.99423e-07	8.34749e-06	0.0241922	DKO-WT
Tmem238	Early immature cDC1s	385.941	0.58425	0.113552	5.14524	2.67184e-07	1.08153e-05	0.0324048	DKO-WT
Creld1	Early immature cDC1s	108.612	0.984129	0.191823	5.1304	2.89127e-07	1.15705e-05	0.0350613	DKO-WT
Atf3	Early immature cDC1s	2579.14	0.931212	0.182568	5.10062	3.38538e-07	1.33457e-05	0.0410474	DKO-WT
Gm37558	Early immature cDC1s	702.379	0.536498	0.106063	5.05829	4.23042e-07	1.6615e-05	0.051279	DKO-WT
Il6	Early immature cDC1s	31.8198	1.91099	0.378425	5.04985	4.42166e-07	1.73018e-05	0.0535944	DKO-WT
Rnf130	Early immature cDC1s	735.44	0.41427	0.0820478	5.04912	4.4384e-07	1.73032e-05	0.053797	DKO-WT
1110038B12Rik	Early immature cDC1s	428.54	0.513447	0.104554	4.91085	9.06825e-07	3.42165e-05	0.10984	DKO-WT
Pdxk	Early immature cDC1s	330.953	0.645233	0.132243	4.87915	1.06544e-06	3.97752e-05	0.12903	DKO-WT
Per1	Early immature cDC1s	450.784	0.553224	0.113377	4.87951	1.06352e-06	3.97752e-05	0.128799	DKO-WT
Inpp4b	Early immature cDC1s	50.848	1.43541	0.294574	4.87284	1.10003e-06	4.05578e-05	0.133209	DKO-WT
Nup62	Early immature cDC1s	144.605	0.792043	0.163224	4.85248	1.21925e-06	4.42659e-05	0.147622	DKO-WT
Slc7a5	Early immature cDC1s	43.1658	1.55849	0.33143	4.70232	2.57216e-06	8.88069e-05	0.311113	DKO-WT
Mpp7	Early immature cDC1s	369.612	0.500069	0.108105	4.62575	3.73239e-06	0.000125983	0.451182	DKO-WT
Gm45220	Early immature cDC1s	280.733	0.554719	0.122016	4.54627	5.46044e-06	0.000178605	0.65967	DKO-WT
Hax1	Early immature cDC1s	417.683	0.47825	0.105799	4.52037	6.17315e-06	0.000200059	0.745611	DKO-WT
Vegfa	Early immature cDC1s	17.1025	2.54964	0.5674	4.49355	7.00466e-06	0.000224937	0.845834	DKO-WT
Gm45221	Early immature cDC1s	484.287	0.4342	0.0969215	4.47992	7.4672e-06	0.000238341	0.901589	DKO-WT
Plaur	Early immature cDC1s	65.819	1.098	0.246487	4.45461	8.40462e-06	0.000267454	1	DKO-WT
Vars	Early immature cDC1s	643.044	0.410471	0.0927881	4.42375	9.70016e-06	0.000303202	1	DKO-WT
Nus1	Early immature cDC1s	457.345	0.426027	0.0966949	4.40589	1.0535e-05	0.0003264	1	DKO-WT
Gm37728	Early immature cDC1s	135.737	0.812109	0.184486	4.402	1.07256e-05	0.000330367	1	DKO-WT
Card9	Early immature cDC1s	63.7206	1.12048	0.257227	4.35599	1.32469e-05	0.000403325	1	DKO-WT
Gm43359	Early immature cDC1s	90.45	0.933354	0.215829	4.32451	1.52872e-05	0.00046014	1	DKO-WT
Ppp1r15b	Early immature cDC1s	550.319	0.418359	0.0981671	4.2617	2.02877e-05	0.000587232	1	DKO-WT
Bbc3	Early immature cDC1s	97.7019	0.842693	0.198498	4.24536	2.18247e-05	0.000626533	1	DKO-WT
Bhlhe40	Early immature cDC1s	173.153	0.633333	0.149742	4.22949	2.34226e-05	0.000665215	1	DKO-WT
Snhg5	Early immature cDC1s	165.665	0.652726	0.154415	4.22709	2.36731e-05	0.000670527	1	DKO-WT
Slc7a11	Early immature cDC1s	25.06	1.79474	0.426663	4.20645	2.5941e-05	0.000726935	1	DKO-WT
Snhg15	Early immature cDC1s	268.53	0.524222	0.125159	4.18845	2.80863e-05	0.000774758	1	DKO-WT
Gm43890	Early immature cDC1s	45.107	1.29555	0.310559	4.17166	3.02385e-05	0.000825502	1	DKO-WT
Nrp1	Early immature cDC1s	146.409	0.726516	0.175379	4.14256	3.43458e-05	0.000928038	1	DKO-WT
Cdk6	Early immature cDC1s	242.627	0.536176	0.1314	4.08048	4.49423e-05	0.0011695	1	DKO-WT
Tmem41b	Early immature cDC1s	195.733	0.58251	0.142984	4.07395	4.62227e-05	0.00119399	1	DKO-WT
Irf2bp2	Early immature cDC1s	737.837	0.420158	0.103216	4.07065	4.68814e-05	0.00120805	1	DKO-WT
Lncpint	Early immature cDC1s	249.011	0.506958	0.125471	4.04042	5.33546e-05	0.00135766	1	DKO-WT
Got1	Early immature cDC1s	559.439	0.408274	0.101283	4.03101	5.55377e-05	0.00140372	1	DKO-WT
Gm49839	Early immature cDC1s	18.1282	2.37899	0.590775	4.0269	5.65163e-05	0.00142165	1	DKO-WT
Amz1	Early immature cDC1s	422.552	0.43935	0.10993	3.99662	6.42545e-05	0.00158981	1	DKO-WT
Pknox1	Early immature cDC1s	88.5586	0.856548	0.215142	3.98131	6.85365e-05	0.00168785	1	DKO-WT
Arl11	Early immature cDC1s	118.402	0.785682	0.198451	3.95907	7.52412e-05	0.00181881	1	DKO-WT
Pbxip1	Early immature cDC1s	399.5	0.434259	0.110953	3.91391	9.08117e-05	0.00214637	1	DKO-WT
Aen	Early immature cDC1s	160.41	0.60705	0.156511	3.87864	0.000105043	0.00243372	1	DKO-WT
Gm37033	Early immature cDC1s	287.876	0.477503	0.123497	3.86653	0.000110397	0.0025466	1	DKO-WT
Tgif1	Early immature cDC1s	355.958	0.448903	0.11623	3.86221	0.000112368	0.0025752	1	DKO-WT
Epb41l4aos	Early immature cDC1s	367.032	0.419043	0.108718	3.85439	0.000116021	0.00264172	1	DKO-WT
Actn1	Early immature cDC1s	576.87	0.40541	0.105737	3.83412	0.000126013	0.00284472	1	DKO-WT
Fgfr1op	Early immature cDC1s	311.507	0.433462	0.113618	3.81509	0.000136131	0.00304065	1	DKO-WT
Hist1h2ap	Early immature cDC1s	114.899	0.689006	0.181367	3.79896	0.000145305	0.00320491	1	DKO-WT
Resf1	Early immature cDC1s	508.681	0.432358	0.11404	3.7913	0.000149864	0.00327808	1	DKO-WT
Bach1	Early immature cDC1s	286.981	0.504402	0.133273	3.78471	0.000153885	0.00334485	1	DKO-WT
Slc20a1	Early immature cDC1s	191.575	0.568756	0.150966	3.76744	0.000164927	0.00352012	1	DKO-WT
Rnf157	Early immature cDC1s	309.597	0.440315	0.117062	3.76138	0.000168979	0.00358486	1	DKO-WT
Hivep3	Early immature cDC1s	114.346	0.69051	0.18386	3.75563	0.000172908	0.00366087	1	DKO-WT
Gm36638	Early immature cDC1s	91.5439	0.870139	0.232446	3.7434	0.000181545	0.00382076	1	DKO-WT
Slc38a7	Early immature cDC1s	50.3318	1.01954	0.279853	3.64314	0.000269333	0.00547213	1	DKO-WT
Mt1	Early immature cDC1s	412.524	0.420315	0.117166	3.58735	0.000334062	0.00659693	1	DKO-WT
Ube2c	Early immature cDC1s	244.987	0.467454	0.13039	3.58504	0.000337023	0.006643	1	DKO-WT
Gpr68	Early immature cDC1s	141.759	0.703554	0.197443	3.56332	0.000366192	0.00713804	1	DKO-WT
Cebpg	Early immature cDC1s	482.128	0.910684	0.256321	3.5529	0.000381006	0.00738593	1	DKO-WT
Rhbdd1	Early immature cDC1s	75.5793	0.806444	0.227653	3.54243	0.000396461	0.00762952	1	DKO-WT
Ctbp2	Early immature cDC1s	159.355	0.537051	0.153237	3.5047	0.000457123	0.00861681	1	DKO-WT
Gm38235	Early immature cDC1s	196.399	0.517874	0.148546	3.48629	0.000489765	0.00914199	1	DKO-WT
Rangap1	Early immature cDC1s	218.034	0.476449	0.137229	3.47192	0.000516749	0.00957799	1	DKO-WT
Tmem205	Early immature cDC1s	257.095	0.427436	0.123318	3.46613	0.000528016	0.00973559	1	DKO-WT
Bambi	Early immature cDC1s	77.9894	0.747107	0.216485	3.45109	0.000558336	0.0102056	1	DKO-WT
Gm44164	Early immature cDC1s	89.7285	0.760109	0.221251	3.4355	0.000591452	0.010652	1	DKO-WT
Gm44695	Early immature cDC1s	101.504	0.678994	0.198243	3.42506	0.00061467	0.0109511	1	DKO-WT
Ifitm6	Early immature cDC1s	339.469	1.37954	0.405218	3.40443	0.000663022	0.0116359	1	DKO-WT
Trmt10c	Early immature cDC1s	229.598	0.440797	0.129804	3.39586	0.000684132	0.0118737	1	DKO-WT
Dclre1c	Early immature cDC1s	85.1462	0.741432	0.218528	3.39284	0.000691725	0.0119608	1	DKO-WT
Tbc1d31	Early immature cDC1s	116.805	0.643974	0.191834	3.35693	0.000788125	0.0132377	1	DKO-WT
Lrrc8d	Early immature cDC1s	222.323	0.459671	0.137011	3.35499	0.000793672	0.0132898	1	DKO-WT
Rasa2	Early immature cDC1s	167.322	0.505725	0.151001	3.34915	0.000810604	0.0135507	1	DKO-WT
C430019N01Rik	Early immature cDC1s	232.172	0.446381	0.134041	3.33018	0.000867907	0.0143497	1	DKO-WT
Il13ra1	Early immature cDC1s	141.425	0.542291	0.163173	3.32341	0.000889234	0.0146336	1	DKO-WT
Prmt3	Early immature cDC1s	235.548	0.428646	0.129247	3.31648	0.000911589	0.0148855	1	DKO-WT
Chka	Early immature cDC1s	245.174	0.445142	0.134739	3.30374	0.000954033	0.0154829	1	DKO-WT
Gm48302	Early immature cDC1s	36.6396	1.06713	0.324396	3.2896	0.0010033	0.0161093	1	DKO-WT
Rbpms	Early immature cDC1s	19.7251	1.48745	0.456676	3.25713	0.00112546	0.0178805	1	DKO-WT
Plagl2	Early immature cDC1s	182.74	0.459917	0.142986	3.21652	0.00129754	0.0201905	1	DKO-WT
Stx3	Early immature cDC1s	146.768	0.534945	0.166598	3.211	0.00132272	0.0204008	1	DKO-WT
Snhg16	Early immature cDC1s	186.853	0.477303	0.149084	3.20157	0.00136683	0.0208377	1	DKO-WT
Egr1	Early immature cDC1s	3681.27	0.643289	0.20173	3.18886	0.00142835	0.0215888	1	DKO-WT
Spred1	Early immature cDC1s	76.7483	0.693565	0.217828	3.184	0.00145253	0.0218293	1	DKO-WT
Pim3	Early immature cDC1s	144.176	0.512984	0.161423	3.17788	0.00148356	0.0222323	1	DKO-WT
5330406M23Rik	Early immature cDC1s	175.952	0.476117	0.149953	3.17511	0.00149778	0.022382	1	DKO-WT
Specc1l	Early immature cDC1s	252.08	0.413093	0.130268	3.17111	0.00151859	0.0225971	1	DKO-WT
Hspa4l	Early immature cDC1s	98.8981	0.672499	0.214629	3.1333	0.0017285	0.0249817	1	DKO-WT
Ddit4	Early immature cDC1s	42.5109	2.08369	0.671773	3.10178	0.00192364	0.0273162	1	DKO-WT
Ccl2	Early immature cDC1s	86.2807	0.717378	0.231979	3.09242	0.0019853	0.0280411	1	DKO-WT
Rab10os	Early immature cDC1s	263.143	0.417761	0.136096	3.06962	0.00214334	0.0297171	1	DKO-WT
Gm42047	Early immature cDC1s	15.7486	1.69829	0.554669	3.0618	0.00220012	0.030345	1	DKO-WT
Irs2	Early immature cDC1s	127.209	0.558641	0.182617	3.05909	0.00222014	0.0304619	1	DKO-WT
Ciart	Early immature cDC1s	24.5899	1.30843	0.42924	3.04824	0.00230187	0.0313179	1	DKO-WT
Lratd2	Early immature cDC1s	30.3161	1.13974	0.375939	3.03171	0.00243174	0.0327278	1	DKO-WT
Dusp6	Early immature cDC1s	103.699	0.564162	0.186942	3.01785	0.00254572	0.0337883	1	DKO-WT
Enho	Early immature cDC1s	52.9321	0.807741	0.269641	2.99561	0.00273895	0.0358131	1	DKO-WT
Gm28791	Early immature cDC1s	129.751	0.518581	0.174504	2.97174	0.00296113	0.0384329	1	DKO-WT
Arl14ep	Early immature cDC1s	96.022	0.577906	0.199515	2.89656	0.00377281	0.0469435	1	DKO-WT
Zfp598	Early immature cDC1s	110.594	0.554968	0.192501	2.88293	0.00393989	0.0487136	1	DKO-WT
Fndc5	Early immature cDC1s	252.814	0.409986	0.142364	2.87984	0.00397883	0.0489874	1	DKO-WT
Ell2	Early immature cDC1s	191.92	0.481827	0.167838	2.87079	0.00409447	0.049722	1	DKO-WT
Gm47088	Early immature cDC1s	27.9447	1.07684	0.375046	2.87121	0.00408904	0.049722	1	DKO-WT

## Sheet: Late immature cDC1s_DOWN
gene	cluster_id	baseMean	logFC	lfcSE	stat	p_val	p_adj.loc	p_adj.glb	contrast
Sec61b	Late immature cDC1s	7330.65	-0.905736	0.0537967	-16.8363	1.32345e-63	5.23403e-61	1.62369e-58	DKO-WT
mt-Rnr2	Late immature cDC1s	50385.8	-0.731254	0.0500364	-14.6145	2.27161e-48	6.18888e-46	2.78629e-43	DKO-WT
Dkk3	Late immature cDC1s	316.227	-2.08478	0.146604	-14.2205	6.83976e-46	1.74699e-43	8.38916e-41	DKO-WT
Gm34084	Late immature cDC1s	3561.62	-0.929409	0.066911	-13.8902	7.26088e-44	1.74546e-41	8.90525e-39	DKO-WT
Gm42418	Late immature cDC1s	54742	-0.967877	0.0730149	-13.2559	4.17194e-40	8.81862e-38	5.11622e-35	DKO-WT
Slc12a2	Late immature cDC1s	392.789	-1.47556	0.115289	-12.7987	1.6665e-37	3.3494e-35	2.0435e-32	DKO-WT
Crip1	Late immature cDC1s	9737.8	-0.765055	0.0621842	-12.3031	8.72055e-35	1.63266e-32	1.06924e-29	DKO-WT
Ost4	Late immature cDC1s	2969.68	-0.7101	0.0582232	-12.1962	3.25765e-34	5.96101e-32	3.9942e-29	DKO-WT
Bcl11a	Late immature cDC1s	1444.51	-0.946415	0.0799674	-11.835	2.57317e-32	4.44325e-30	3.15461e-27	DKO-WT
Pianp	Late immature cDC1s	1219.73	-0.871236	0.0777886	-11.2	4.07564e-29	6.32498e-27	4.99552e-24	DKO-WT
Map2k6	Late immature cDC1s	655.098	-0.972439	0.0874417	-11.121	9.91595e-29	1.50086e-26	1.21538e-23	DKO-WT
mt-Rnr1	Late immature cDC1s	12888.2	-0.646909	0.0591086	-10.9444	7.06693e-28	1.03144e-25	8.6613e-23	DKO-WT
Man2b1	Late immature cDC1s	8181.85	-0.589037	0.0540938	-10.8892	1.29787e-27	1.85023e-25	1.59065e-22	DKO-WT
Lars2	Late immature cDC1s	1132.75	-0.915041	0.0866497	-10.5602	4.55481e-26	6.06978e-24	5.58178e-21	DKO-WT
S100a11	Late immature cDC1s	11236.5	-0.654447	0.0621609	-10.5283	6.40063e-26	8.43782e-24	7.84346e-21	DKO-WT
Cacna1e	Late immature cDC1s	967.315	-0.960822	0.09352	-10.274	9.23249e-25	1.17907e-22	1.13127e-19	DKO-WT
Etv3	Late immature cDC1s	3068.89	-0.798134	0.0785771	-10.1573	3.07358e-24	3.80628e-22	3.76578e-19	DKO-WT
Abcg1	Late immature cDC1s	467.918	-1.06256	0.105168	-10.1035	5.33267e-24	6.53785e-22	6.53358e-19	DKO-WT
Tbc1d4	Late immature cDC1s	3421.68	-0.656691	0.0651412	-10.081	6.7012e-24	8.13433e-22	8.21011e-19	DKO-WT
Gm8221	Late immature cDC1s	148.178	-1.94801	0.197117	-9.88249	4.95858e-23	5.8454e-21	6.07446e-18	DKO-WT
Camk1d	Late immature cDC1s	3041.81	-0.56212	0.0572694	-9.81536	9.66916e-23	1.11834e-20	1.18447e-17	DKO-WT
Ckb	Late immature cDC1s	5445.93	-0.583037	0.0596512	-9.77411	1.45426e-22	1.66629e-20	1.78146e-17	DKO-WT
Cdc14a	Late immature cDC1s	1279.66	-0.783652	0.0804768	-9.73761	2.08402e-22	2.32938e-20	2.55277e-17	DKO-WT
Flt1	Late immature cDC1s	481.21	-0.995563	0.102252	-9.7364	2.10898e-22	2.32938e-20	2.58331e-17	DKO-WT
Vwf	Late immature cDC1s	304.973	-1.31024	0.135326	-9.68209	3.59288e-22	3.93292e-20	4.40088e-17	DKO-WT
Synrg	Late immature cDC1s	1284.36	-0.729627	0.0753809	-9.6792	3.69597e-22	4.00996e-20	4.52708e-17	DKO-WT
Fmo5	Late immature cDC1s	338.837	-1.12114	0.116133	-9.65394	4.73044e-22	5.0873e-20	5.79399e-17	DKO-WT
1600010M07Rik	Late immature cDC1s	907.893	-0.749171	0.0781701	-9.58385	9.34893e-22	9.7964e-20	1.14503e-16	DKO-WT
Slc25a20	Late immature cDC1s	1644.11	-0.729673	0.0761537	-9.58158	9.55741e-22	9.92998e-20	1.17055e-16	DKO-WT
Cd9	Late immature cDC1s	5526.67	-0.61265	0.0641801	-9.5458	1.35058e-21	1.37984e-19	1.65408e-16	DKO-WT
Pik3cb	Late immature cDC1s	1667.13	-0.788655	0.082736	-9.53218	1.54013e-21	1.56049e-19	1.8862e-16	DKO-WT
Dnase1l3	Late immature cDC1s	14760.4	-0.747678	0.0787072	-9.49949	2.10924e-21	2.11961e-19	2.5831e-16	DKO-WT
Mpeg1	Late immature cDC1s	14130.4	-0.552922	0.0583513	-9.47575	2.64839e-21	2.61849e-19	3.24327e-16	DKO-WT
Abcg3	Late immature cDC1s	1399.39	-0.743049	0.0784949	-9.46621	2.9019e-21	2.84619e-19	3.5537e-16	DKO-WT
Cd48	Late immature cDC1s	2293.98	-0.592327	0.0626471	-9.45498	3.2309e-21	3.14372e-19	3.95653e-16	DKO-WT
Ltbp2	Late immature cDC1s	145.696	-1.64464	0.174559	-9.42173	4.43718e-21	4.24999e-19	5.4336e-16	DKO-WT
Cd52	Late immature cDC1s	49526.6	-0.507001	0.0538572	-9.41379	4.78554e-21	4.53905e-19	5.86013e-16	DKO-WT
Serf2	Late immature cDC1s	7173.01	-0.477423	0.0512823	-9.30971	1.28178e-20	1.19959e-18	1.56953e-15	DKO-WT
Ccr9	Late immature cDC1s	433.273	-0.992804	0.107459	-9.23889	2.4906e-20	2.24521e-18	3.04955e-15	DKO-WT
Treml4	Late immature cDC1s	1857.94	-0.613801	0.0664329	-9.23942	2.47848e-20	2.24521e-18	3.03473e-15	DKO-WT
Ubl5	Late immature cDC1s	4796.86	-0.516329	0.0562153	-9.18486	4.12077e-20	3.63458e-18	5.04531e-15	DKO-WT
Armc8	Late immature cDC1s	1196.54	-0.784257	0.0861591	-9.10242	8.83383e-20	7.73591e-18	1.08153e-14	DKO-WT
mt-Nd1	Late immature cDC1s	30224.4	-0.494664	0.0545738	-9.06415	1.25585e-19	1.08428e-17	1.53748e-14	DKO-WT
Cblb	Late immature cDC1s	711.858	-0.79824	0.0880751	-9.06318	1.26705e-19	1.0863e-17	1.55117e-14	DKO-WT
Cbr3	Late immature cDC1s	759.895	-0.819602	0.0908164	-9.02482	1.79987e-19	1.53239e-17	2.20342e-14	DKO-WT
Scp2	Late immature cDC1s	1906.11	-0.591175	0.0657475	-8.9916	2.4365e-19	2.03208e-17	2.98272e-14	DKO-WT
Trib1	Late immature cDC1s	5349.12	-0.659713	0.0737612	-8.94391	3.75638e-19	3.11171e-17	4.59838e-14	DKO-WT
Arhgap18	Late immature cDC1s	1797.58	-0.600619	0.0671641	-8.94256	3.80248e-19	3.12875e-17	4.65473e-14	DKO-WT
Hepacam2	Late immature cDC1s	1769.7	-0.677482	0.0765236	-8.85324	8.50171e-19	6.94873e-17	1.04065e-13	DKO-WT
Pot1b	Late immature cDC1s	562.642	-0.848905	0.0959845	-8.84419	9.21965e-19	7.48563e-17	1.1285e-13	DKO-WT
Nedd8	Late immature cDC1s	6959.74	-0.47456	0.0541521	-8.76347	1.89326e-18	1.50723e-16	2.31726e-13	DKO-WT
Tmsb4x	Late immature cDC1s	653761	-0.437277	0.0502397	-8.70381	3.20923e-18	2.52213e-16	3.92771e-13	DKO-WT
Adam23	Late immature cDC1s	2242.91	-0.764812	0.0878922	-8.70171	3.26934e-18	2.553e-16	4.00124e-13	DKO-WT
BC028528	Late immature cDC1s	3482.97	-0.512113	0.0590411	-8.67384	4.17785e-18	3.2418e-16	5.11294e-13	DKO-WT
Adgrl3	Late immature cDC1s	343.406	-1.07972	0.124614	-8.66453	4.53362e-18	3.45231e-16	5.54819e-13	DKO-WT
Stk38l	Late immature cDC1s	410.598	-1.01322	0.117525	-8.62129	6.62017e-18	5.01008e-16	8.1015e-13	DKO-WT
Cenpv	Late immature cDC1s	1204.03	-0.612869	0.0716384	-8.55504	1.17831e-17	8.86262e-16	1.44191e-12	DKO-WT
Itm2a	Late immature cDC1s	82.8249	-2.01435	0.235498	-8.55357	1.19339e-17	8.9213e-16	1.46035e-12	DKO-WT
Ptgis	Late immature cDC1s	600.824	-0.858434	0.101403	-8.46555	2.54946e-17	1.88292e-15	3.1197e-12	DKO-WT
Snd1	Late immature cDC1s	487.1	-0.86089	0.102118	-8.43036	3.44591e-17	2.49981e-15	4.21655e-12	DKO-WT
Ece1	Late immature cDC1s	4508.75	-0.447006	0.0534316	-8.36595	5.96308e-17	4.30043e-15	7.29618e-12	DKO-WT
Igsf6	Late immature cDC1s	377.908	-0.955543	0.11461	-8.33732	7.59957e-17	5.38559e-15	9.29807e-12	DKO-WT
Lacc1	Late immature cDC1s	1212.08	-0.6033	0.0724925	-8.32225	8.63104e-17	6.08141e-15	1.05599e-11	DKO-WT
Trf	Late immature cDC1s	558.04	-0.843605	0.101393	-8.32016	8.78458e-17	6.15422e-15	1.07477e-11	DKO-WT
Gusb	Late immature cDC1s	5009.78	-0.588041	0.0709733	-8.28538	1.17732e-16	8.1548e-15	1.4404e-11	DKO-WT
Gm47135	Late immature cDC1s	278.831	-1.02211	0.123596	-8.26977	1.34222e-16	9.19308e-15	1.6421e-11	DKO-WT
Neurl3	Late immature cDC1s	699.137	-0.774969	0.0940131	-8.2432	1.67659e-16	1.14195e-14	2.05116e-11	DKO-WT
Syne1	Late immature cDC1s	968.679	-0.704905	0.0857812	-8.21748	2.07826e-16	1.40771e-14	2.54251e-11	DKO-WT
Uqcrh	Late immature cDC1s	8463.79	-0.500078	0.0610958	-8.18514	2.7198e-16	1.83213e-14	3.32711e-11	DKO-WT
St8sia4	Late immature cDC1s	2965.3	-0.494013	0.0603977	-8.17933	2.85437e-16	1.91227e-14	3.49169e-11	DKO-WT
Cyb5a	Late immature cDC1s	7401.65	-0.438973	0.0537036	-8.174	2.98328e-16	1.98777e-14	3.64936e-11	DKO-WT
Dnajb9	Late immature cDC1s	499.844	-0.822183	0.101072	-8.13464	4.13157e-16	2.72328e-14	5.05382e-11	DKO-WT
9530059O14Rik	Late immature cDC1s	926.392	-0.652268	0.0807317	-8.07945	6.50608e-16	4.19813e-14	7.95772e-11	DKO-WT
Ssr1	Late immature cDC1s	1344.97	-0.592435	0.0733429	-8.0776	6.60523e-16	4.23979e-14	8.07892e-11	DKO-WT
Mxd4	Late immature cDC1s	841.687	-0.667452	0.0826479	-8.07585	6.70077e-16	4.27872e-14	8.19571e-11	DKO-WT
Xcr1	Late immature cDC1s	8603.88	-0.454865	0.0563527	-8.07175	6.92954e-16	4.40187e-14	8.47545e-11	DKO-WT
Rcn2	Late immature cDC1s	661.544	-0.722198	0.0903184	-7.99614	1.28381e-15	8.03039e-14	1.57014e-10	DKO-WT
Tlr12	Late immature cDC1s	623.96	-0.745632	0.0939451	-7.93689	2.07316e-15	1.27084e-13	2.5353e-10	DKO-WT
Gm47938	Late immature cDC1s	62.838	-2.15794	0.272175	-7.92852	2.21778e-15	1.34604e-13	2.7121e-10	DKO-WT
Tns3	Late immature cDC1s	1401.41	-0.554318	0.0699669	-7.92257	2.3266e-15	1.40513e-13	2.84513e-10	DKO-WT
mt-Atp8	Late immature cDC1s	384.343	-0.879471	0.111287	-7.90272	2.72874e-15	1.63992e-13	3.33676e-10	DKO-WT
Chsy1	Late immature cDC1s	809.468	-0.700985	0.0887171	-7.90136	2.75885e-15	1.64993e-13	3.37355e-10	DKO-WT
Igha	Late immature cDC1s	35.7306	-4.17091	0.530374	-7.86408	3.71814e-15	2.20214e-13	4.54613e-10	DKO-WT
Trim35	Late immature cDC1s	9972.46	-0.544511	0.0692701	-7.86069	3.82026e-15	2.25175e-13	4.67096e-10	DKO-WT
Spty2d1	Late immature cDC1s	1015.4	-0.585875	0.0749844	-7.81329	5.57141e-15	3.23723e-13	6.81156e-10	DKO-WT
Tm9sf2	Late immature cDC1s	2550.4	-0.573105	0.0734193	-7.80592	5.90686e-15	3.41595e-13	7.22155e-10	DKO-WT
Flt3	Late immature cDC1s	2874.9	-0.528527	0.0681286	-7.75779	8.64251e-15	4.95127e-13	1.05654e-09	DKO-WT
Creb3l2	Late immature cDC1s	63.2549	-2.11185	0.272894	-7.73873	1.00416e-14	5.72604e-13	1.22755e-09	DKO-WT
Homer2	Late immature cDC1s	267.129	-0.992339	0.128339	-7.73216	1.05737e-14	6.00156e-13	1.29259e-09	DKO-WT
Arsb	Late immature cDC1s	1673.56	-0.593528	0.0769912	-7.70903	1.26775e-14	7.16247e-13	1.54971e-09	DKO-WT
Ear2	Late immature cDC1s	90.2769	-1.74103	0.226772	-7.67745	1.6229e-14	9.04396e-13	1.98365e-09	DKO-WT
Ptprs	Late immature cDC1s	563.296	-0.696145	0.0911	-7.64154	2.14634e-14	1.18001e-12	2.62332e-09	DKO-WT
Bvht	Late immature cDC1s	81.5474	-1.82165	0.238805	-7.6282	2.38062e-14	1.29143e-12	2.90957e-09	DKO-WT
Tspan13	Late immature cDC1s	6852.88	-0.536788	0.0704213	-7.62252	2.48768e-14	1.34357e-12	3.04039e-09	DKO-WT
Gm44270	Late immature cDC1s	430.064	-0.852099	0.112341	-7.58493	3.32655e-14	1.78094e-12	4.06541e-09	DKO-WT
Myh9	Late immature cDC1s	2980.53	-0.442401	0.0585301	-7.55852	4.07666e-14	2.16363e-12	4.98193e-09	DKO-WT
Tnf	Late immature cDC1s	683.67	-1.71302	0.226888	-7.55006	4.35047e-14	2.299e-12	5.31649e-09	DKO-WT
Cd8a	Late immature cDC1s	5493.28	-0.433989	0.0575312	-7.54353	4.57406e-14	2.40678e-12	5.5896e-09	DKO-WT
Tmem131	Late immature cDC1s	1722.06	-0.619281	0.0824065	-7.51495	5.69332e-14	2.98291e-12	6.95713e-09	DKO-WT
1810058I24Rik	Late immature cDC1s	1844.09	-0.487404	0.0649522	-7.50404	6.18791e-14	3.22825e-12	7.56138e-09	DKO-WT
Sesn3	Late immature cDC1s	381.205	-0.812545	0.109012	-7.4537	9.07615e-14	4.6558e-12	1.10903e-08	DKO-WT
Ndufa4	Late immature cDC1s	4998.85	-0.402137	0.0540121	-7.44532	9.67066e-14	4.94009e-12	1.18165e-08	DKO-WT
Mast4	Late immature cDC1s	604.887	-0.720469	0.0970517	-7.42356	1.14012e-13	5.79996e-12	1.39305e-08	DKO-WT
Sec61a1	Late immature cDC1s	1015.56	-0.590342	0.0795753	-7.41865	1.1832e-13	5.99423e-12	1.44566e-08	DKO-WT
Rtl8a	Late immature cDC1s	860.78	-0.621265	0.0837541	-7.41772	1.1915e-13	6.01143e-12	1.45579e-08	DKO-WT
Anxa6	Late immature cDC1s	4467.11	-0.48394	0.0654457	-7.39453	1.41907e-13	7.07229e-12	1.73372e-08	DKO-WT
Baz2b	Late immature cDC1s	1606.88	-0.485781	0.0660809	-7.35131	1.96272e-13	9.66385e-12	2.39764e-08	DKO-WT
Rtn1	Late immature cDC1s	610.15	-0.702892	0.0956854	-7.34587	2.0443e-13	1.00252e-11	2.49724e-08	DKO-WT
Dpp4	Late immature cDC1s	1927.04	-0.539098	0.0734301	-7.34165	2.1098e-13	1.03052e-11	2.57722e-08	DKO-WT
Tram1	Late immature cDC1s	1215.36	-0.639552	0.0871559	-7.33802	2.16775e-13	1.05463e-11	2.64798e-08	DKO-WT
Pdia5	Late immature cDC1s	1802.5	-0.535367	0.0729681	-7.33701	2.1842e-13	1.05843e-11	2.66804e-08	DKO-WT
Cd244a	Late immature cDC1s	784.635	-0.642127	0.0876558	-7.32555	2.37924e-13	1.1439e-11	2.90614e-08	DKO-WT
Neat1	Late immature cDC1s	5087.03	-0.561427	0.0766612	-7.32349	2.41604e-13	1.15706e-11	2.95105e-08	DKO-WT
Fnbp1	Late immature cDC1s	6914.28	-0.428271	0.0587258	-7.29272	3.0375e-13	1.4434e-11	3.70994e-08	DKO-WT
Ppfibp2	Late immature cDC1s	2283.38	-0.466543	0.0640208	-7.28737	3.16075e-13	1.49298e-11	3.86041e-08	DKO-WT
CT010467.1	Late immature cDC1s	1199.19	-0.516529	0.071041	-7.27086	3.57218e-13	1.67156e-11	4.36281e-08	DKO-WT
Trappc1	Late immature cDC1s	928.713	-0.635498	0.0876671	-7.24899	4.19892e-13	1.94259e-11	5.12793e-08	DKO-WT
Dbi	Late immature cDC1s	2269.29	-0.466985	0.0647037	-7.21729	5.30335e-13	2.41707e-11	6.47635e-08	DKO-WT
Rel	Late immature cDC1s	5582.17	-0.563852	0.0783423	-7.19729	6.14207e-13	2.77866e-11	7.50039e-08	DKO-WT
Gramd2	Late immature cDC1s	326.102	-0.868323	0.121048	-7.17336	7.31772e-13	3.29836e-11	8.93582e-08	DKO-WT
Golgb1	Late immature cDC1s	589.241	-0.682021	0.0959058	-7.11136	1.14901e-12	5.04905e-11	1.40294e-07	DKO-WT
Picalm	Late immature cDC1s	4781.17	-0.43794	0.061835	-7.08239	1.41689e-12	6.20396e-11	1.72991e-07	DKO-WT
Traf1	Late immature cDC1s	1759.3	-0.626955	0.0885942	-7.0767	1.47624e-12	6.41799e-11	1.80235e-07	DKO-WT
Stt3a	Late immature cDC1s	853.007	-0.565862	0.0800591	-7.06805	1.57127e-12	6.80698e-11	1.91835e-07	DKO-WT
Ptprc	Late immature cDC1s	8685.46	-0.428407	0.0606981	-7.05799	1.68927e-12	7.26984e-11	2.06233e-07	DKO-WT
Copa	Late immature cDC1s	1392.52	-0.510131	0.0723551	-7.05038	1.78424e-12	7.64854e-11	2.17822e-07	DKO-WT
Btg2	Late immature cDC1s	35496.1	-0.423192	0.0600597	-7.04619	1.83881e-12	7.85501e-11	2.24481e-07	DKO-WT
Prr13	Late immature cDC1s	3177.44	-0.421302	0.0598106	-7.04393	1.86898e-12	7.95616e-11	2.28162e-07	DKO-WT
Nav1	Late immature cDC1s	1565.12	-0.505024	0.0721154	-7.00299	2.50557e-12	1.05199e-10	3.05852e-07	DKO-WT
Naaa	Late immature cDC1s	15813	-0.433538	0.0619924	-6.9934	2.68299e-12	1.11883e-10	3.27502e-07	DKO-WT
Cdk14	Late immature cDC1s	2996.93	-0.489025	0.0701855	-6.9676	3.22393e-12	1.33984e-10	3.93516e-07	DKO-WT
Mir6236	Late immature cDC1s	1180.28	-0.57054	0.0821431	-6.94569	3.76622e-12	1.55941e-10	4.59675e-07	DKO-WT
Adam8	Late immature cDC1s	3569.16	-0.44806	0.0646688	-6.92854	4.25197e-12	1.74345e-10	5.18941e-07	DKO-WT
Lpar6	Late immature cDC1s	1602.92	-0.645	0.0932316	-6.91826	4.57228e-12	1.86233e-10	5.58023e-07	DKO-WT
Cks1b	Late immature cDC1s	596.241	-0.62305	0.0901393	-6.91208	4.77613e-12	1.93252e-10	5.82888e-07	DKO-WT
Ttc39a	Late immature cDC1s	912.537	-0.629503	0.0911727	-6.90452	5.03732e-12	2.01563e-10	6.14749e-07	DKO-WT
Clnk	Late immature cDC1s	153.773	-1.16101	0.168158	-6.90424	5.04729e-12	2.01563e-10	6.15962e-07	DKO-WT
Il10ra	Late immature cDC1s	1854.87	-0.64751	0.0937797	-6.90459	5.03489e-12	2.01563e-10	6.14458e-07	DKO-WT
Clec9a	Late immature cDC1s	5926.96	-0.439976	0.06376	-6.90049	5.18234e-12	2.06284e-10	6.32437e-07	DKO-WT
Cpd	Late immature cDC1s	199.827	-1.00997	0.146895	-6.87548	6.17833e-12	2.44343e-10	7.53947e-07	DKO-WT
Rab11fip1	Late immature cDC1s	1550.75	-0.535158	0.0780486	-6.85673	7.04541e-12	2.75964e-10	8.59716e-07	DKO-WT
Parp8	Late immature cDC1s	1825	-0.507181	0.0739768	-6.85594	7.08427e-12	2.76603e-10	8.64444e-07	DKO-WT
Gm28809	Late immature cDC1s	110.972	-1.31405	0.191762	-6.85252	7.25602e-12	2.81515e-10	8.8538e-07	DKO-WT
Gm45266	Late immature cDC1s	707.583	-0.588208	0.0859939	-6.84011	7.91319e-12	3.06043e-10	9.65552e-07	DKO-WT
Ncoa7	Late immature cDC1s	8352.97	-0.501175	0.0734144	-6.82666	8.69143e-12	3.3299e-10	1.06045e-06	DKO-WT
Malt1	Late immature cDC1s	3499.91	-0.617705	0.0905509	-6.82163	9.00153e-12	3.42996e-10	1.09828e-06	DKO-WT
Asap1	Late immature cDC1s	1839.04	-0.435405	0.0638674	-6.81733	9.27471e-12	3.52037e-10	1.13159e-06	DKO-WT
Slc4a7	Late immature cDC1s	1314.66	-0.496372	0.0729436	-6.80487	1.01138e-11	3.827e-10	1.23393e-06	DKO-WT
Pik3cd	Late immature cDC1s	915.228	-0.629681	0.0927812	-6.78673	1.14705e-11	4.31374e-10	1.39941e-06	DKO-WT
Gsn	Late immature cDC1s	2029.27	-0.438112	0.06459	-6.78298	1.17721e-11	4.41365e-10	1.43619e-06	DKO-WT
Agpat4	Late immature cDC1s	1402.52	-0.570115	0.0845395	-6.74377	1.54332e-11	5.76864e-10	1.88269e-06	DKO-WT
Zc3h7a	Late immature cDC1s	1076.52	-0.5325	0.0791909	-6.72426	1.76485e-11	6.5766e-10	2.15285e-06	DKO-WT
Rnase6	Late immature cDC1s	4583.9	-0.410249	0.0610197	-6.72321	1.7776e-11	6.60405e-10	2.16839e-06	DKO-WT
Epb41	Late immature cDC1s	792.913	-0.621116	0.0925548	-6.71079	1.93572e-11	7.16977e-10	2.36123e-06	DKO-WT
Tet2	Late immature cDC1s	1217.06	-0.547282	0.0815922	-6.70753	1.97946e-11	7.3097e-10	2.41457e-06	DKO-WT
Dock8	Late immature cDC1s	1207.68	-0.486214	0.072672	-6.69052	2.22379e-11	8.1384e-10	2.71251e-06	DKO-WT
Plpp5	Late immature cDC1s	103.806	-1.44504	0.216096	-6.68703	2.2774e-11	8.3098e-10	2.77784e-06	DKO-WT
Nckap1l	Late immature cDC1s	2500.52	-0.413931	0.061949	-6.6818	2.36018e-11	8.5609e-10	2.87874e-06	DKO-WT
Akap13	Late immature cDC1s	2419.02	-0.452886	0.0683506	-6.62592	3.45082e-11	1.23344e-09	4.20852e-06	DKO-WT
Serp1	Late immature cDC1s	3267.75	-0.423161	0.0639715	-6.61484	3.71952e-11	1.32178e-09	4.53607e-06	DKO-WT
Mier1	Late immature cDC1s	1826.41	-0.455257	0.0689292	-6.6047	3.98314e-11	1.40326e-09	4.85744e-06	DKO-WT
Top2b	Late immature cDC1s	1601.78	-0.459581	0.0699353	-6.57152	4.98027e-11	1.7346e-09	6.07294e-06	DKO-WT
Gm26740	Late immature cDC1s	568.805	-0.598006	0.0910768	-6.56595	5.17016e-11	1.79212e-09	6.30444e-06	DKO-WT
Cd274	Late immature cDC1s	127.59	-1.24321	0.189346	-6.56582	5.17463e-11	1.79212e-09	6.30984e-06	DKO-WT
Golph3	Late immature cDC1s	1275.9	-0.475751	0.0725859	-6.55432	5.58947e-11	1.91952e-09	6.81546e-06	DKO-WT
Ddx3x	Late immature cDC1s	3137.32	-0.408352	0.0623881	-6.54536	5.9354e-11	2.03263e-09	7.23721e-06	DKO-WT
Tbc1d9	Late immature cDC1s	3474.88	-0.481809	0.0736206	-6.54449	5.9697e-11	2.03868e-09	7.27898e-06	DKO-WT
Lamb3	Late immature cDC1s	175.192	-1.09472	0.167475	-6.53662	6.29265e-11	2.13706e-09	7.67257e-06	DKO-WT
Ppp1r15a	Late immature cDC1s	2840.53	-0.433103	0.0664265	-6.52004	7.02895e-11	2.34809e-09	8.5699e-06	DKO-WT
Ctdp1	Late immature cDC1s	849.9	-0.522807	0.0801819	-6.52026	7.01833e-11	2.34809e-09	8.55703e-06	DKO-WT
Gpr82	Late immature cDC1s	75.5345	-1.5375	0.237225	-6.48119	9.10039e-11	2.99117e-09	1.10944e-05	DKO-WT
Apol7c	Late immature cDC1s	6747.04	-1.37639	0.212367	-6.48119	9.10016e-11	2.99117e-09	1.10942e-05	DKO-WT
Cyth4	Late immature cDC1s	2346.79	-0.444748	0.0686299	-6.48038	9.14929e-11	2.99921e-09	1.11539e-05	DKO-WT
Gm2a	Late immature cDC1s	28692	-0.438518	0.0678328	-6.46469	1.01505e-10	3.31855e-09	1.23741e-05	DKO-WT
Ndufa1	Late immature cDC1s	1713.39	-0.427974	0.0662398	-6.46097	1.04032e-10	3.37417e-09	1.26819e-05	DKO-WT
Gm45223	Late immature cDC1s	1990.83	-0.521019	0.0807466	-6.45252	1.10002e-10	3.5397e-09	1.3409e-05	DKO-WT
Gpr4	Late immature cDC1s	902.389	-0.586725	0.0911865	-6.43434	1.24014e-10	3.98015e-09	1.51166e-05	DKO-WT
Gm11837	Late immature cDC1s	466.097	-0.82506	0.129445	-6.37382	1.84374e-10	5.83553e-09	2.24711e-05	DKO-WT
2900026A02Rik	Late immature cDC1s	40.5834	-2.24476	0.352581	-6.36667	1.93179e-10	6.07277e-09	2.35435e-05	DKO-WT
Ankrd44	Late immature cDC1s	1152.47	-0.485054	0.0763871	-6.34994	2.15394e-10	6.71942e-09	2.62499e-05	DKO-WT
Clec1a	Late immature cDC1s	187.668	-0.952637	0.150583	-6.32634	2.5105e-10	7.79209e-09	3.0594e-05	DKO-WT
Eid1	Late immature cDC1s	2473	-0.414561	0.0659338	-6.28753	3.22549e-10	9.91091e-09	3.93042e-05	DKO-WT
Sec63	Late immature cDC1s	881.611	-0.50208	0.0798808	-6.28537	3.27071e-10	1.00247e-08	3.98543e-05	DKO-WT
Cd207	Late immature cDC1s	520.465	-2.23015	0.355563	-6.27218	3.56037e-10	1.08582e-08	4.3382e-05	DKO-WT
Pcsk5	Late immature cDC1s	92.5613	-1.62994	0.260109	-6.26636	3.69585e-10	1.12434e-08	4.50321e-05	DKO-WT
Diaph1	Late immature cDC1s	904.003	-0.520057	0.0830331	-6.26325	3.77045e-10	1.14138e-08	4.59395e-05	DKO-WT
Ranbp2	Late immature cDC1s	1883.2	-0.459255	0.0734381	-6.25363	4.01014e-10	1.21094e-08	4.88588e-05	DKO-WT
Aph1c	Late immature cDC1s	1773.01	-0.499509	0.0801752	-6.23022	4.65777e-10	1.39279e-08	5.67428e-05	DKO-WT
Ggt5	Late immature cDC1s	59.1785	-1.86242	0.299234	-6.22396	4.84751e-10	1.446e-08	5.90533e-05	DKO-WT
Tob2	Late immature cDC1s	3491.22	-0.519034	0.0835695	-6.2108	5.27154e-10	1.55733e-08	6.42132e-05	DKO-WT
Gm34455	Late immature cDC1s	235.967	-1.04511	0.17005	-6.14592	7.95012e-10	2.32622e-08	9.68253e-05	DKO-WT
Fmnl2	Late immature cDC1s	1856.12	-0.497892	0.0815068	-6.10859	1.00517e-09	2.92024e-08	0.000122409	DKO-WT
Gm37033	Late immature cDC1s	1097.89	-0.496788	0.0816041	-6.08778	1.14484e-09	3.29479e-08	0.00013941	DKO-WT
Vps37b	Late immature cDC1s	745.325	-0.554526	0.0911824	-6.0815	1.19064e-09	3.41857e-08	0.000144985	DKO-WT
Cd44	Late immature cDC1s	3434.44	-0.442845	0.072917	-6.07327	1.2533e-09	3.58169e-08	0.000152611	DKO-WT
Cd68	Late immature cDC1s	1483.3	-0.443052	0.0730075	-6.06858	1.29046e-09	3.67079e-08	0.000157132	DKO-WT
Gm45221	Late immature cDC1s	1733.76	-0.471115	0.0777135	-6.0622	1.34271e-09	3.81056e-08	0.000163489	DKO-WT
Cd300e	Late immature cDC1s	170.626	-0.987806	0.163041	-6.05864	1.37281e-09	3.87804e-08	0.000167148	DKO-WT
Nabp1	Late immature cDC1s	1064.1	-0.520498	0.0860774	-6.04686	1.47695e-09	4.16262e-08	0.000179826	DKO-WT
Tbc1d8	Late immature cDC1s	2065.21	-0.506402	0.0838618	-6.03853	1.55524e-09	4.37323e-08	0.000189356	DKO-WT
Iglc2	Late immature cDC1s	23.2785	-3.15074	0.523665	-6.0167	1.78012e-09	4.99411e-08	0.000216722	DKO-WT
Skil	Late immature cDC1s	4315.12	-0.523504	0.0870267	-6.01544	1.79399e-09	5.02155e-08	0.00021841	DKO-WT
Stra6l	Late immature cDC1s	117.468	-1.17395	0.19529	-6.0113	1.8404e-09	5.12803e-08	0.000224054	DKO-WT
Cd7	Late immature cDC1s	80.9832	-1.46355	0.243453	-6.01162	1.83681e-09	5.12803e-08	0.000223619	DKO-WT
Gm36723	Late immature cDC1s	1412.59	-0.468634	0.0780734	-6.00248	1.94323e-09	5.40227e-08	0.000236563	DKO-WT
Fam168a	Late immature cDC1s	907.573	-0.479287	0.0798674	-6.00103	1.96064e-09	5.43833e-08	0.00023868	DKO-WT
Igf2r	Late immature cDC1s	295.283	-0.750752	0.125515	-5.98137	2.21269e-09	6.0961e-08	0.000269353	DKO-WT
Map3k14	Late immature cDC1s	587.441	-0.560352	0.0940514	-5.95793	2.55451e-09	6.99069e-08	0.000310932	DKO-WT
Rab43	Late immature cDC1s	2245.63	-0.448932	0.0753943	-5.95445	2.60945e-09	7.12512e-08	0.000317616	DKO-WT
Slc16a6	Late immature cDC1s	1089.94	-0.54671	0.0918358	-5.95312	2.63074e-09	7.1673e-08	0.000320205	DKO-WT
Adam17	Late immature cDC1s	680.13	-0.519317	0.0873186	-5.94739	2.72456e-09	7.40646e-08	0.000331615	DKO-WT
Cadm1	Late immature cDC1s	7371.99	-0.408998	0.0689555	-5.93134	3.0048e-09	8.06101e-08	0.000365699	DKO-WT
Mark3	Late immature cDC1s	1352.03	-0.50407	0.0849801	-5.93162	2.99955e-09	8.06101e-08	0.000365063	DKO-WT
4930503L19Rik	Late immature cDC1s	330.429	-0.702212	0.118378	-5.93193	2.99385e-09	8.06101e-08	0.000364373	DKO-WT
Tnfrsf21	Late immature cDC1s	579.774	-0.589818	0.0995057	-5.92748	3.07611e-09	8.2343e-08	0.000374375	DKO-WT
Apobr	Late immature cDC1s	1192.05	-0.424745	0.0718565	-5.91101	3.40007e-09	9.08166e-08	0.000413788	DKO-WT
Il1b	Late immature cDC1s	18084.6	-1.02881	0.17457	-5.89342	3.78274e-09	1.006e-07	0.000460337	DKO-WT
Mgat2	Late immature cDC1s	1004.76	-0.468263	0.0797157	-5.87416	4.2499e-09	1.12051e-07	0.000517157	DKO-WT
Dbn1	Late immature cDC1s	1347.26	-0.424962	0.072428	-5.86737	4.42752e-09	1.16484e-07	0.000538767	DKO-WT
H2-Eb2	Late immature cDC1s	126.565	-1.10902	0.189068	-5.86571	4.47202e-09	1.17403e-07	0.000544173	DKO-WT
Slc20a2	Late immature cDC1s	322.561	-0.76034	0.129671	-5.86362	4.52885e-09	1.1864e-07	0.000551084	DKO-WT
Ccdc167	Late immature cDC1s	260.877	-0.752978	0.128697	-5.85077	4.89297e-09	1.27906e-07	0.000595382	DKO-WT
Map3k8	Late immature cDC1s	466.085	-0.639497	0.109386	-5.84626	5.02743e-09	1.31017e-07	0.000611723	DKO-WT
Spag9	Late immature cDC1s	4643.75	-0.417227	0.0714782	-5.83712	5.31114e-09	1.37373e-07	0.000646207	DKO-WT
Ero1lb	Late immature cDC1s	776.955	-0.486146	0.0833277	-5.83415	5.40661e-09	1.39547e-07	0.000657817	DKO-WT
Idh1	Late immature cDC1s	236.074	-0.850127	0.14575	-5.83277	5.45142e-09	1.40408e-07	0.000663263	DKO-WT
Lsm6	Late immature cDC1s	1892.95	-0.418391	0.0718467	-5.82338	5.7669e-09	1.47912e-07	0.00070163	DKO-WT
Itpr1	Late immature cDC1s	1620.86	-0.43677	0.0753032	-5.80015	6.62543e-09	1.68522e-07	0.00080601	DKO-WT
S100a13	Late immature cDC1s	1268.12	-0.404919	0.0698563	-5.79645	6.77332e-09	1.71927e-07	0.000823995	DKO-WT
Themis2	Late immature cDC1s	1310.57	-0.432295	0.0746122	-5.79389	6.87758e-09	1.74213e-07	0.000836664	DKO-WT
Mgll	Late immature cDC1s	81.2464	-1.36633	0.236374	-5.78036	7.4543e-09	1.87274e-07	0.000906785	DKO-WT
Gm9530	Late immature cDC1s	574.984	-0.537752	0.0931138	-5.77521	7.68565e-09	1.92298e-07	0.000934913	DKO-WT
Fam49a	Late immature cDC1s	854.907	-0.474758	0.082723	-5.73914	9.51609e-09	2.35216e-07	0.00115742	DKO-WT
Pmaip1	Late immature cDC1s	6201.23	-0.438699	0.0764394	-5.73917	9.51421e-09	2.35216e-07	0.0011572	DKO-WT
Adam22	Late immature cDC1s	149.826	-0.968722	0.168827	-5.73797	9.582e-09	2.36369e-07	0.00116542	DKO-WT
Eif4g3	Late immature cDC1s	1430.88	-0.415725	0.0725392	-5.73105	9.98116e-09	2.4425e-07	0.00121392	DKO-WT
Epb41l2	Late immature cDC1s	1576.26	-0.472107	0.0823855	-5.73046	1.00158e-08	2.44528e-07	0.00121812	DKO-WT
Itgae	Late immature cDC1s	639.898	-1.52146	0.265968	-5.72048	1.06223e-08	2.5788e-07	0.00129183	DKO-WT
9930120I10Rik	Late immature cDC1s	1666.2	-0.437164	0.0764481	-5.71845	1.07502e-08	2.59443e-07	0.00130735	DKO-WT
Kdm5a	Late immature cDC1s	1140.95	-0.416778	0.0729163	-5.71584	1.0916e-08	2.62929e-07	0.00132751	DKO-WT
Kdm6b	Late immature cDC1s	5411.36	-0.454646	0.0796664	-5.70688	1.15067e-08	2.76071e-07	0.00139928	DKO-WT
Sdc3	Late immature cDC1s	1153.98	-0.414457	0.0728324	-5.69056	1.26623e-08	3.02023e-07	0.0015397	DKO-WT
Frmd4b	Late immature cDC1s	834.122	-0.506359	0.0891925	-5.67714	1.36964e-08	3.22918e-07	0.00166527	DKO-WT
Mrps21	Late immature cDC1s	1204.75	-0.436569	0.0769726	-5.67174	1.4135e-08	3.31984e-07	0.00171857	DKO-WT
Synj1	Late immature cDC1s	1873.72	-0.437565	0.0773429	-5.65746	1.53626e-08	3.58071e-07	0.00186769	DKO-WT
Adgrf5	Late immature cDC1s	62.8563	-1.60057	0.283283	-5.65006	1.60392e-08	3.73133e-07	0.00194989	DKO-WT
Tmem88	Late immature cDC1s	230.511	-0.990082	0.175894	-5.62885	1.81416e-08	4.18863e-07	0.00220535	DKO-WT
Gfpt1	Late immature cDC1s	1374.3	-0.460422	0.0818179	-5.6274	1.82942e-08	4.21592e-07	0.00222388	DKO-WT
Sdhaf4	Late immature cDC1s	729.991	-0.516391	0.0917936	-5.62557	1.84895e-08	4.25293e-07	0.0022476	DKO-WT
Gm38115	Late immature cDC1s	1069.49	-0.471056	0.0839256	-5.61278	1.99099e-08	4.56254e-07	0.00242017	DKO-WT
Plekhb2	Late immature cDC1s	1003.6	-0.466106	0.0831214	-5.60752	2.05241e-08	4.68577e-07	0.00249466	DKO-WT
Prr5l	Late immature cDC1s	1278.91	-0.474599	0.0847996	-5.59671	2.18459e-08	4.96903e-07	0.00265524	DKO-WT
Zfp710	Late immature cDC1s	933.641	-0.472655	0.0844497	-5.59688	2.18247e-08	4.96903e-07	0.00265269	DKO-WT
Nr4a2	Late immature cDC1s	12476.6	-0.468946	0.0838458	-5.59296	2.23228e-08	5.0681e-07	0.00271318	DKO-WT
Armcx2	Late immature cDC1s	65.3854	-1.41336	0.252807	-5.59069	2.26175e-08	5.12551e-07	0.00274897	DKO-WT
Cyth1	Late immature cDC1s	390.67	-0.590476	0.105924	-5.57451	2.48224e-08	5.5839e-07	0.00301669	DKO-WT
mt-Nd3	Late immature cDC1s	1533.8	-0.405008	0.0729798	-5.5496	2.86331e-08	6.35945e-07	0.00347941	DKO-WT
Grap2	Late immature cDC1s	205.496	-0.829386	0.149759	-5.53815	3.05675e-08	6.75238e-07	0.00371435	DKO-WT
9130015A21Rik	Late immature cDC1s	165.987	-1.03749	0.187459	-5.53449	3.12142e-08	6.88285e-07	0.00379284	DKO-WT
Tmem39a	Late immature cDC1s	268.867	-0.709855	0.128652	-5.51763	3.43595e-08	7.53574e-07	0.00417479	DKO-WT
Plek	Late immature cDC1s	8522.33	-0.429728	0.077903	-5.51619	3.46424e-08	7.58421e-07	0.00420912	DKO-WT
mt-Nd6	Late immature cDC1s	220.507	-0.745188	0.135969	-5.48056	4.2399e-08	9.08762e-07	0.0051508	DKO-WT
Anpep	Late immature cDC1s	1428.1	-0.400529	0.0734504	-5.45306	4.95109e-08	1.05383e-06	0.00601424	DKO-WT
2510009E07Rik	Late immature cDC1s	117.086	-1.19998	0.22038	-5.44505	5.17916e-08	1.10046e-06	0.00629108	DKO-WT
Lsmem1	Late immature cDC1s	40.0104	-2.1787	0.401681	-5.42395	5.82952e-08	1.228e-06	0.00708047	DKO-WT
Dapp1	Late immature cDC1s	2867.19	-0.410719	0.0759391	-5.40853	6.35428e-08	1.32715e-06	0.00771734	DKO-WT
Dusp16	Late immature cDC1s	547.685	-0.513792	0.0952809	-5.39239	6.9527e-08	1.4423e-06	0.00844336	DKO-WT
Iqgap2	Late immature cDC1s	877.981	-0.430224	0.0799462	-5.38141	7.39028e-08	1.52533e-06	0.00897424	DKO-WT
Cyb5r3	Late immature cDC1s	1307.44	-0.419334	0.078057	-5.37214	7.78067e-08	1.60052e-06	0.00944784	DKO-WT
Surf4	Late immature cDC1s	1009.17	-0.426112	0.0793302	-5.37137	7.81386e-08	1.60465e-06	0.00948798	DKO-WT
Fcrla	Late immature cDC1s	508.198	-0.538609	0.100438	-5.36258	8.20412e-08	1.68198e-06	0.0099612	DKO-WT
Crem	Late immature cDC1s	764.687	-0.573613	0.107448	-5.33853	9.37045e-08	1.90201e-06	0.0113763	DKO-WT
Cd300c	Late immature cDC1s	188.267	-0.806457	0.151388	-5.32707	9.98087e-08	2.02257e-06	0.0121169	DKO-WT
Kit	Late immature cDC1s	1845.92	-0.482967	0.0908052	-5.31871	1.04503e-07	2.10871e-06	0.0126862	DKO-WT
Tmem248	Late immature cDC1s	450.973	-0.532703	0.100159	-5.31859	1.04576e-07	2.10871e-06	0.0126949	DKO-WT
Soat1	Late immature cDC1s	1211.16	-0.421064	0.0795381	-5.29387	1.19757e-07	2.39284e-06	0.0145366	DKO-WT
Pirb	Late immature cDC1s	926.905	-0.439245	0.0829713	-5.29394	1.19708e-07	2.39284e-06	0.0145308	DKO-WT
9930111J21Rik2	Late immature cDC1s	668.306	-0.494117	0.0933399	-5.29374	1.19837e-07	2.39284e-06	0.0145462	DKO-WT
Galnt11	Late immature cDC1s	673.012	-0.491293	0.0928802	-5.28953	1.2263e-07	2.44066e-06	0.0148848	DKO-WT
Sec31a	Late immature cDC1s	786.092	-0.438013	0.0828634	-5.28597	1.25041e-07	2.48461e-06	0.0151772	DKO-WT
C920009B18Rik	Late immature cDC1s	253.944	-0.712687	0.134886	-5.28363	1.26646e-07	2.51242e-06	0.0153717	DKO-WT
Fnta	Late immature cDC1s	493.645	-0.552577	0.104691	-5.27818	1.30474e-07	2.58418e-06	0.0158362	DKO-WT
Fndc7	Late immature cDC1s	746.746	-0.453728	0.0864018	-5.25137	1.50975e-07	2.97104e-06	0.0183221	DKO-WT
Nfam1	Late immature cDC1s	651.407	-0.463904	0.0883568	-5.25035	1.5181e-07	2.98267e-06	0.0184232	DKO-WT
Slc12a3	Late immature cDC1s	93.4792	-1.16432	0.221801	-5.24938	1.52615e-07	2.99369e-06	0.0185207	DKO-WT
Col27a1	Late immature cDC1s	107.367	-1.24224	0.236761	-5.24682	1.54747e-07	3.02102e-06	0.018779	DKO-WT
B230307C23Rik	Late immature cDC1s	313.377	-0.609075	0.116079	-5.24705	1.54552e-07	3.02102e-06	0.0187557	DKO-WT
St6gal1	Late immature cDC1s	676.665	-0.473369	0.0903945	-5.23671	1.63468e-07	3.16772e-06	0.0198357	DKO-WT
Vcam1	Late immature cDC1s	145.621	-0.898309	0.172351	-5.2121	1.86714e-07	3.54352e-06	0.0226519	DKO-WT
Ly75	Late immature cDC1s	777.882	-0.422101	0.0813319	-5.18986	2.10449e-07	3.95721e-06	0.0255283	DKO-WT
Cep70	Late immature cDC1s	233.357	-0.714267	0.137949	-5.17775	2.24576e-07	4.19711e-06	0.0272404	DKO-WT
Atp1b3	Late immature cDC1s	2089.5	-0.416194	0.0810417	-5.13555	2.81315e-07	5.19415e-06	0.0341161	DKO-WT
Rnf145	Late immature cDC1s	387.616	-0.586561	0.114271	-5.13305	2.85081e-07	5.24789e-06	0.0345715	DKO-WT
Kdm2b	Late immature cDC1s	1151.01	-0.413073	0.0805072	-5.13088	2.88383e-07	5.29279e-06	0.0349714	DKO-WT
Pecam1	Late immature cDC1s	344.394	-0.697416	0.135924	-5.13094	2.88303e-07	5.29279e-06	0.0349619	DKO-WT
Clasp2	Late immature cDC1s	528.065	-0.496763	0.0969557	-5.12361	2.99745e-07	5.49308e-06	0.0363479	DKO-WT
Gm43984	Late immature cDC1s	719.877	-0.48394	0.0945332	-5.11925	3.06749e-07	5.61305e-06	0.0371964	DKO-WT
Cttnbp2nl	Late immature cDC1s	324.802	-0.614112	0.120187	-5.10965	3.22753e-07	5.87956e-06	0.039135	DKO-WT
Itga4	Late immature cDC1s	7650.33	-0.432516	0.0849016	-5.09433	3.49985e-07	6.33799e-06	0.042434	DKO-WT
Ufsp2	Late immature cDC1s	453.14	-0.526252	0.103315	-5.09366	3.51213e-07	6.35084e-06	0.0425825	DKO-WT
Fcgr2b	Late immature cDC1s	535.987	-0.533447	0.105352	-5.06347	4.11696e-07	7.31506e-06	0.0499062	DKO-WT
Cdk5rap3	Late immature cDC1s	495.2	-0.499843	0.0987422	-5.06209	4.14675e-07	7.35733e-06	0.0502669	DKO-WT
Uggt1	Late immature cDC1s	716.042	-0.427411	0.0844948	-5.05844	4.22705e-07	7.4797e-06	0.051239	DKO-WT
Polr1a	Late immature cDC1s	757.296	-0.425728	0.0843498	-5.04717	4.48391e-07	7.89839e-06	0.0543482	DKO-WT
Baz2a	Late immature cDC1s	905.944	-0.422624	0.083908	-5.03676	4.73489e-07	8.31659e-06	0.0573874	DKO-WT
Sec14l1	Late immature cDC1s	438.16	-0.534016	0.106229	-5.02703	4.9814e-07	8.71212e-06	0.0603726	DKO-WT
Dcstamp	Late immature cDC1s	212.016	-0.842951	0.167794	-5.02372	5.06789e-07	8.85075e-06	0.0614197	DKO-WT
Nucb1	Late immature cDC1s	694.308	-0.438734	0.0876651	-5.00467	5.5959e-07	9.69007e-06	0.0678139	DKO-WT
Gm12551	Late immature cDC1s	256.219	-0.673812	0.134771	-4.99968	5.74254e-07	9.92998e-06	0.0695904	DKO-WT
Med21	Late immature cDC1s	2013.59	-0.461714	0.0930368	-4.9627	6.95189e-07	1.18871e-05	0.0842319	DKO-WT
Fgd3	Late immature cDC1s	357.854	-0.560338	0.113004	-4.95858	7.10098e-07	1.21251e-05	0.0860369	DKO-WT
Ccdc192	Late immature cDC1s	16.5001	-2.82387	0.569687	-4.95687	7.16362e-07	1.2215e-05	0.0867937	DKO-WT
Serpinb9	Late immature cDC1s	1873.4	-0.454427	0.0919298	-4.9432	7.68522e-07	1.305e-05	0.0931049	DKO-WT
Sfxn2	Late immature cDC1s	429.983	-0.51688	0.104638	-4.9397	7.82414e-07	1.32309e-05	0.094784	DKO-WT
Midn	Late immature cDC1s	691.841	-0.435778	0.0883908	-4.93013	8.21749e-07	1.38591e-05	0.0995443	DKO-WT
Ass1	Late immature cDC1s	866.619	-0.447642	0.0908677	-4.92631	8.37963e-07	1.40732e-05	0.101505	DKO-WT
Sned1	Late immature cDC1s	21.5684	-2.38504	0.487425	-4.89315	9.92331e-07	1.64405e-05	0.120186	DKO-WT
Hsd17b4	Late immature cDC1s	486.357	-0.496999	0.10175	-4.88452	1.03681e-06	1.71543e-05	0.125567	DKO-WT
Prss57	Late immature cDC1s	59.3882	-1.25923	0.258327	-4.87453	1.09066e-06	1.79301e-05	0.132077	DKO-WT
Plce1	Late immature cDC1s	393.574	-0.539364	0.110905	-4.86329	1.15451e-06	1.89482e-05	0.139795	DKO-WT
Mical2	Late immature cDC1s	150.746	-0.819665	0.168675	-4.85944	1.17719e-06	1.92688e-05	0.142536	DKO-WT
Gm37084	Late immature cDC1s	442.055	-0.641277	0.132398	-4.84356	1.27532e-06	2.07587e-05	0.154398	DKO-WT
Hltf	Late immature cDC1s	768.967	-0.459856	0.0949981	-4.84069	1.2939e-06	2.09831e-05	0.156641	DKO-WT
Trip11	Late immature cDC1s	763.908	-0.40689	0.0841799	-4.83358	1.34098e-06	2.17179e-05	0.162337	DKO-WT
Nuak2	Late immature cDC1s	1132.25	-0.405604	0.0839864	-4.82941	1.36941e-06	2.21198e-05	0.165775	DKO-WT
Dipk1a	Late immature cDC1s	645.663	-0.479642	0.0993437	-4.82811	1.37837e-06	2.2177e-05	0.166855	DKO-WT
Gm43111	Late immature cDC1s	359.282	-0.538622	0.111632	-4.82499	1.40011e-06	2.24678e-05	0.169482	DKO-WT
Arfgap3	Late immature cDC1s	97.5851	-0.990372	0.20574	-4.81371	1.48155e-06	2.37126e-05	0.179333	DKO-WT
Arl5b	Late immature cDC1s	748.431	-0.510337	0.106049	-4.81229	1.4921e-06	2.38192e-05	0.180605	DKO-WT
Gm10177	Late immature cDC1s	172.515	-0.734379	0.152674	-4.81011	1.50847e-06	2.40492e-05	0.182585	DKO-WT
Gm45220	Late immature cDC1s	1247.96	-0.408097	0.0848842	-4.80768	1.52689e-06	2.42797e-05	0.18481	DKO-WT
Asph	Late immature cDC1s	416.967	-0.56346	0.117262	-4.80513	1.54652e-06	2.456e-05	0.187183	DKO-WT
Mefv	Late immature cDC1s	482.374	-1.42978	0.298529	-4.78941	1.67275e-06	2.63937e-05	0.202441	DKO-WT
Pik3r5	Late immature cDC1s	478.172	-0.590882	0.123422	-4.78751	1.6886e-06	2.66095e-05	0.204357	DKO-WT
Adgrg5	Late immature cDC1s	165.867	-0.761108	0.159625	-4.7681	1.85973e-06	2.9082e-05	0.225044	DKO-WT
Notch4	Late immature cDC1s	423.486	-0.569829	0.119518	-4.7677	1.86337e-06	2.91018e-05	0.225483	DKO-WT
Srgap2	Late immature cDC1s	510.065	-0.462473	0.097158	-4.76001	1.93588e-06	3.01957e-05	0.234253	DKO-WT
Arhgap31	Late immature cDC1s	522.567	-0.50804	0.10674	-4.75959	1.93982e-06	3.02188e-05	0.234728	DKO-WT
Gm43594	Late immature cDC1s	39.9518	-1.53291	0.322584	-4.75198	2.01436e-06	3.12213e-05	0.243734	DKO-WT
Mab21l3	Late immature cDC1s	66.8757	-1.199	0.253364	-4.73233	2.21955e-06	3.40998e-05	0.268519	DKO-WT
Slc7a8	Late immature cDC1s	118.749	-0.872814	0.184432	-4.73245	2.21827e-06	3.40998e-05	0.268367	DKO-WT
Gm13535	Late immature cDC1s	349.989	-0.609389	0.129105	-4.7201	2.35732e-06	3.5991e-05	0.285165	DKO-WT
Mybpc3	Late immature cDC1s	114.849	-0.942928	0.200447	-4.70413	2.54949e-06	3.86641e-05	0.308379	DKO-WT
Pacsin1	Late immature cDC1s	78.7813	-1.08498	0.230842	-4.70012	2.60007e-06	3.93541e-05	0.314483	DKO-WT
mt-Atp6	Late immature cDC1s	815.352	-0.408909	0.0873063	-4.68361	2.81866e-06	4.2284e-05	0.340886	DKO-WT
Gm36486	Late immature cDC1s	251.224	-0.665844	0.142189	-4.6828	2.82981e-06	4.23608e-05	0.342226	DKO-WT
P3h2	Late immature cDC1s	929.117	-0.402483	0.0860948	-4.67488	2.94119e-06	4.39208e-05	0.355678	DKO-WT
Map4	Late immature cDC1s	764.696	-0.405782	0.0870765	-4.66006	3.16117e-06	4.68633e-05	0.382226	DKO-WT
Ccl22	Late immature cDC1s	63.5019	-1.43446	0.308304	-4.65275	3.27536e-06	4.82643e-05	0.39601	DKO-WT
Tspan2	Late immature cDC1s	90.229	-1.01348	0.218101	-4.64686	3.37033e-06	4.94853e-05	0.407479	DKO-WT
Gm49599	Late immature cDC1s	506.251	-0.443846	0.0956516	-4.64024	3.48011e-06	5.08536e-05	0.420735	DKO-WT
Mapk9	Late immature cDC1s	474.159	-0.454961	0.0981405	-4.63581	3.55543e-06	5.18307e-05	0.429823	DKO-WT
Gm44423	Late immature cDC1s	1143.9	-0.442424	0.0963074	-4.59387	4.35094e-06	6.2316e-05	0.525854	DKO-WT
Gfod1	Late immature cDC1s	669.176	-0.405203	0.0882006	-4.59411	4.34598e-06	6.2316e-05	0.525259	DKO-WT
Tnr	Late immature cDC1s	33.5101	-1.63507	0.356466	-4.5869	4.49881e-06	6.42089e-05	0.54369	DKO-WT
Uap1	Late immature cDC1s	333.063	-0.539243	0.117678	-4.58237	4.59745e-06	6.53884e-05	0.555588	DKO-WT
Gm38410	Late immature cDC1s	105.205	-0.948018	0.20709	-4.57781	4.69876e-06	6.65975e-05	0.567808	DKO-WT
Prkab2	Late immature cDC1s	497.463	-0.441092	0.0966881	-4.56201	5.06673e-06	7.11547e-05	0.612218	DKO-WT
Bst1	Late immature cDC1s	380.434	-0.50327	0.11034	-4.56109	5.08889e-06	7.13841e-05	0.61489	DKO-WT
Mir142hg	Late immature cDC1s	295.264	-0.636858	0.140069	-4.54675	5.44799e-06	7.57283e-05	0.658182	DKO-WT
I830077J02Rik	Late immature cDC1s	806.933	-0.413347	0.0913811	-4.52333	6.08735e-06	8.35732e-05	0.735285	DKO-WT
Sec24d	Late immature cDC1s	101.018	-0.969605	0.21437	-4.52305	6.09535e-06	8.35895e-05	0.736245	DKO-WT
Sema4d	Late immature cDC1s	615.586	-0.406383	0.089949	-4.51793	6.2447e-06	8.50667e-05	0.75421	DKO-WT
Sec61g	Late immature cDC1s	433.251	-0.476933	0.105902	-4.50352	6.6837e-06	9.0644e-05	0.80715	DKO-WT
Gm47644	Late immature cDC1s	138.756	-0.883436	0.196259	-4.50139	6.75109e-06	9.13558e-05	0.815262	DKO-WT
Utrn	Late immature cDC1s	318.975	-0.570205	0.126709	-4.5001	6.79223e-06	9.171e-05	0.820209	DKO-WT
4930523C07Rik	Late immature cDC1s	2034.33	-0.740049	0.165048	-4.48385	7.33086e-06	9.8333e-05	0.88515	DKO-WT
Cd38	Late immature cDC1s	651.396	-0.519717	0.116259	-4.47033	7.80976e-06	0.000103812	0.942841	DKO-WT
Dop1a	Late immature cDC1s	571.852	-0.437101	0.0981089	-4.45527	8.3789e-06	0.000110815	1	DKO-WT
Fgr	Late immature cDC1s	185.697	-0.898906	0.202053	-4.44887	8.63242e-06	0.000113922	1	DKO-WT
Eif2ak3	Late immature cDC1s	159.878	-0.732613	0.165353	-4.4306	9.39711e-06	0.000122955	1	DKO-WT
Cd180	Late immature cDC1s	2096.9	-0.431918	0.0981782	-4.39933	1.08588e-05	0.000140135	1	DKO-WT
Farp2	Late immature cDC1s	102.735	-0.857618	0.194978	-4.39854	1.08981e-05	0.0001402	1	DKO-WT
AU015336	Late immature cDC1s	107.929	-0.834082	0.189609	-4.39896	1.08769e-05	0.0001402	1	DKO-WT
Nav2	Late immature cDC1s	16.0208	-2.53957	0.577662	-4.39629	1.10115e-05	0.00014151	1	DKO-WT
Wdr6	Late immature cDC1s	149.573	-0.794744	0.181137	-4.38753	1.14645e-05	0.00014687	1	DKO-WT
Gm13216	Late immature cDC1s	56.236	-1.15772	0.265422	-4.3618	1.28998e-05	0.000163855	1	DKO-WT
Cpq	Late immature cDC1s	666.981	-0.402426	0.0924173	-4.35444	1.33406e-05	0.000168614	1	DKO-WT
Sec23b	Late immature cDC1s	316.442	-0.506355	0.11643	-4.34902	1.36748e-05	0.000172128	1	DKO-WT
Flnb	Late immature cDC1s	674.334	-0.448074	0.103148	-4.34401	1.39904e-05	0.00017556	1	DKO-WT
Chil5	Late immature cDC1s	79.8386	-1.07131	0.246999	-4.33731	1.44235e-05	0.000180257	1	DKO-WT
Stom	Late immature cDC1s	546.998	-0.42582	0.0983516	-4.32956	1.49406e-05	0.00018615	1	DKO-WT
Slc41a1	Late immature cDC1s	667.574	-0.530967	0.122661	-4.32874	1.49967e-05	0.000186504	1	DKO-WT
Vamp5	Late immature cDC1s	403.527	-0.498472	0.115155	-4.3287	1.49995e-05	0.000186504	1	DKO-WT
Ypel2	Late immature cDC1s	71.8696	-1.0792	0.24983	-4.31973	1.56219e-05	0.000193459	1	DKO-WT
Erlin2	Late immature cDC1s	485.801	-0.421142	0.0977928	-4.30647	1.65877e-05	0.000204182	1	DKO-WT
Gm45222	Late immature cDC1s	477.854	-0.471729	0.109766	-4.2976	1.72655e-05	0.000211675	1	DKO-WT
Prkch	Late immature cDC1s	683.138	-0.431612	0.100477	-4.29565	1.74183e-05	0.000213335	1	DKO-WT
Pfkfb1	Late immature cDC1s	17.422	-2.17662	0.507714	-4.28711	1.81016e-05	0.000220225	1	DKO-WT
Trabd2b	Late immature cDC1s	88.2117	-0.911008	0.213334	-4.27033	1.9518e-05	0.000236219	1	DKO-WT
Ano6	Late immature cDC1s	286.25	-0.525577	0.123139	-4.26817	1.97083e-05	0.000238053	1	DKO-WT
Ufl1	Late immature cDC1s	382.151	-0.49128	0.115228	-4.26357	2.0119e-05	0.000242536	1	DKO-WT
Slc8a1	Late immature cDC1s	597.394	-0.480896	0.113037	-4.25434	2.09662e-05	0.000250776	1	DKO-WT
Extl3	Late immature cDC1s	595.467	-0.404874	0.095178	-4.25387	2.10111e-05	0.000251068	1	DKO-WT
Klhl18	Late immature cDC1s	458.707	-0.445925	0.104836	-4.25354	2.10416e-05	0.000251188	1	DKO-WT
Uxs1	Late immature cDC1s	208.681	-0.595242	0.140137	-4.24757	2.16098e-05	0.000256721	1	DKO-WT
Gpd2	Late immature cDC1s	1205.65	-0.417212	0.0983012	-4.24422	2.19354e-05	0.000259833	1	DKO-WT
Tm4sf5	Late immature cDC1s	87.2142	-0.919441	0.216735	-4.24223	2.21313e-05	0.000261649	1	DKO-WT
Cmtr1	Late immature cDC1s	450.944	-0.474499	0.111896	-4.24053	2.22996e-05	0.000263131	1	DKO-WT
Tbc1d1	Late immature cDC1s	399.335	-0.459677	0.10871	-4.22847	2.35285e-05	0.00027551	1	DKO-WT
Lfng	Late immature cDC1s	266.281	-0.629461	0.148893	-4.22761	2.36183e-05	0.000276034	1	DKO-WT
Clec7a	Late immature cDC1s	258.537	-0.674936	0.159757	-4.22476	2.39192e-05	0.000279285	1	DKO-WT
Siglecg	Late immature cDC1s	144.203	-0.766881	0.181645	-4.22187	2.42281e-05	0.000281284	1	DKO-WT
Gm37472	Late immature cDC1s	210.293	-0.610074	0.144713	-4.21576	2.48936e-05	0.000288465	1	DKO-WT
Gmppb	Late immature cDC1s	342.822	-0.53677	0.127643	-4.20524	2.60801e-05	0.000301359	1	DKO-WT
Tnnc2	Late immature cDC1s	28.0517	-1.74217	0.415587	-4.19207	2.76425e-05	0.000317319	1	DKO-WT
Acsf2	Late immature cDC1s	179.569	-0.661541	0.158106	-4.18415	2.8623e-05	0.000326132	1	DKO-WT
Gm38257	Late immature cDC1s	144.207	-0.703599	0.168698	-4.17077	3.03574e-05	0.000342708	1	DKO-WT
4932438H23Rik	Late immature cDC1s	85.1467	-0.895292	0.214873	-4.16661	3.0916e-05	0.000348053	1	DKO-WT
Afap1	Late immature cDC1s	109.928	-0.788013	0.189136	-4.16638	3.09478e-05	0.000348092	1	DKO-WT
Dtnb	Late immature cDC1s	242.587	-0.688384	0.165442	-4.16088	3.1703e-05	0.000355933	1	DKO-WT
Rec8	Late immature cDC1s	11.615	-2.84233	0.684049	-4.15515	3.25069e-05	0.000363959	1	DKO-WT
Cep250	Late immature cDC1s	247.582	-0.560007	0.134937	-4.15012	3.323e-05	0.000371038	1	DKO-WT
Gadd45g	Late immature cDC1s	330.688	-0.575838	0.138961	-4.14387	3.41499e-05	0.000378552	1	DKO-WT
Sec24c	Late immature cDC1s	400.012	-0.457582	0.110528	-4.13995	3.47381e-05	0.000384376	1	DKO-WT
Itga3	Late immature cDC1s	126.21	-0.728633	0.176459	-4.12918	3.64064e-05	0.00039959	1	DKO-WT
Slc43a2	Late immature cDC1s	199.295	-0.58424	0.14151	-4.1286	3.64976e-05	0.000400233	1	DKO-WT
Rasip1	Late immature cDC1s	75.8001	-0.969948	0.235565	-4.11754	3.82933e-05	0.000417683	1	DKO-WT
Gm43982	Late immature cDC1s	187.335	-0.639512	0.155434	-4.11436	3.88256e-05	0.000422362	1	DKO-WT
Synpo	Late immature cDC1s	129.219	-0.886981	0.215933	-4.10767	3.99666e-05	0.00043362	1	DKO-WT
Gm48382	Late immature cDC1s	50.5286	-1.17565	0.286248	-4.10712	4.0063e-05	0.000434282	1	DKO-WT
Med14	Late immature cDC1s	360.183	-0.49735	0.121598	-4.09013	4.31135e-05	0.000462442	1	DKO-WT
Specc1	Late immature cDC1s	519.285	-1.05196	0.257339	-4.08782	4.35455e-05	0.000466667	1	DKO-WT
Gm44428	Late immature cDC1s	160.479	-0.672929	0.1647	-4.08578	4.39298e-05	0.000470293	1	DKO-WT
Gm42941	Late immature cDC1s	202.804	-0.608595	0.149104	-4.08168	4.47116e-05	0.000476664	1	DKO-WT
Prkar2b	Late immature cDC1s	319.06	-0.480128	0.117639	-4.08135	4.47748e-05	0.000476924	1	DKO-WT
Tnfrsf23	Late immature cDC1s	57.946	-1.15825	0.284987	-4.06422	4.81927e-05	0.00050847	1	DKO-WT
Ipcef1	Late immature cDC1s	315.495	-0.475956	0.117427	-4.05321	5.05203e-05	0.000530291	1	DKO-WT
Fbxw7	Late immature cDC1s	490.402	-0.406714	0.100408	-4.0506	5.10859e-05	0.000534853	1	DKO-WT
1810014P07Rik	Late immature cDC1s	46.2636	-1.34892	0.333244	-4.04786	5.16888e-05	0.000540366	1	DKO-WT
Tmem67	Late immature cDC1s	80.5814	-0.887214	0.219432	-4.04324	5.27182e-05	0.000548663	1	DKO-WT
Pfkfb3	Late immature cDC1s	575.584	-0.418382	0.10353	-4.04116	5.31871e-05	0.000552605	1	DKO-WT
Enc1	Late immature cDC1s	230.018	-0.64541	0.159866	-4.0372	5.40924e-05	0.000560585	1	DKO-WT
Palb2	Late immature cDC1s	103.607	-0.794865	0.197479	-4.02506	5.69602e-05	0.000586341	1	DKO-WT
Nr4a3	Late immature cDC1s	8069.01	-0.793998	0.197453	-4.02119	5.79037e-05	0.000595554	1	DKO-WT
Gm37589	Late immature cDC1s	141.19	-0.667761	0.166204	-4.01772	5.8764e-05	0.000601876	1	DKO-WT
Shc1	Late immature cDC1s	467.46	-0.404234	0.100604	-4.01808	5.86733e-05	0.000601876	1	DKO-WT
AW011738	Late immature cDC1s	240.15	-0.532411	0.132837	-4.008	6.12343e-05	0.000625089	1	DKO-WT
Abca3	Late immature cDC1s	658.201	-0.424761	0.106074	-4.00439	6.21777e-05	0.000633664	1	DKO-WT
Zc3h12a	Late immature cDC1s	309.623	-0.471754	0.118055	-3.99605	6.44087e-05	0.000653144	1	DKO-WT
D930030I03Rik	Late immature cDC1s	126.732	-0.773195	0.193702	-3.99168	6.56066e-05	0.000661461	1	DKO-WT
Zfc3h1	Late immature cDC1s	340.422	-0.459583	0.115172	-3.99041	6.59584e-05	0.000664461	1	DKO-WT
Gadd45b	Late immature cDC1s	2540.37	-0.720931	0.180833	-3.98673	6.69915e-05	0.000674316	1	DKO-WT
Kazn	Late immature cDC1s	42.5683	-1.22138	0.306423	-3.98594	6.72147e-05	0.000676007	1	DKO-WT
Bcl2l14	Late immature cDC1s	863.097	-0.461703	0.116016	-3.97964	6.90201e-05	0.000690764	1	DKO-WT
BC106179	Late immature cDC1s	51.5877	-1.15333	0.290043	-3.97639	6.99686e-05	0.000696372	1	DKO-WT
Abcd2	Late immature cDC1s	17.4379	-1.9988	0.504764	-3.95986	7.4993e-05	0.000740865	1	DKO-WT
Afdn	Late immature cDC1s	306.079	-0.472025	0.1193	-3.95663	7.60149e-05	0.000748702	1	DKO-WT
Spata13	Late immature cDC1s	163.161	-0.664297	0.168042	-3.95315	7.71276e-05	0.000758896	1	DKO-WT
Klri1	Late immature cDC1s	221.588	-0.556065	0.140845	-3.94806	7.87856e-05	0.000773348	1	DKO-WT
Madd	Late immature cDC1s	452.099	-0.401435	0.101919	-3.93877	8.19007e-05	0.000801359	1	DKO-WT
Rnf217	Late immature cDC1s	22.0679	-1.81096	0.460381	-3.93362	8.36778e-05	0.000813552	1	DKO-WT
Gm38235	Late immature cDC1s	617.798	-0.42023	0.107318	-3.91574	9.01277e-05	0.000871424	1	DKO-WT
Gm42937	Late immature cDC1s	128.077	-0.707685	0.180834	-3.91346	9.09836e-05	0.000877918	1	DKO-WT
Cd5	Late immature cDC1s	75.9274	-0.928893	0.237364	-3.91338	9.10141e-05	0.000877918	1	DKO-WT
Gm37390	Late immature cDC1s	253.906	-0.550748	0.141351	-3.89632	9.76663e-05	0.000937245	1	DKO-WT
Zp1	Late immature cDC1s	21.4843	-1.69829	0.437967	-3.87766	0.000105465	0.00100036	1	DKO-WT
Atp10d	Late immature cDC1s	396.095	-0.445573	0.115085	-3.87169	0.000108084	0.00102325	1	DKO-WT
Gprc5c	Late immature cDC1s	231.359	-0.519127	0.134242	-3.86708	0.000110144	0.00103882	1	DKO-WT
Gm37420	Late immature cDC1s	275.373	-0.510839	0.132329	-3.86037	0.000113216	0.00106444	1	DKO-WT
Capn15	Late immature cDC1s	419.76	-0.403458	0.104749	-3.85168	0.000117308	0.00109535	1	DKO-WT
Hspa13	Late immature cDC1s	179.398	-0.575756	0.149794	-3.84365	0.000121216	0.0011267	1	DKO-WT
Gbp4	Late immature cDC1s	45.215	-1.16529	0.303608	-3.83814	0.000123969	0.0011462	1	DKO-WT
Armcx3	Late immature cDC1s	142.71	-0.662413	0.173161	-3.82541	0.000130552	0.00119983	1	DKO-WT
Dhx57	Late immature cDC1s	180.122	-0.568696	0.149038	-3.81578	0.000135754	0.00124205	1	DKO-WT
Homer1	Late immature cDC1s	213.213	-0.548325	0.143713	-3.81541	0.000135955	0.00124296	1	DKO-WT
Gm16094	Late immature cDC1s	56.4652	-1.00737	0.264254	-3.81214	0.000137766	0.00125858	1	DKO-WT
Cep120	Late immature cDC1s	334.689	-0.445759	0.116948	-3.8116	0.000138071	0.00126043	1	DKO-WT
Scd1	Late immature cDC1s	55.9883	-1.00956	0.265371	-3.80435	0.00014218	0.00129408	1	DKO-WT
Gpcpd1	Late immature cDC1s	2861.37	-0.592011	0.156476	-3.78341	0.000154696	0.00139045	1	DKO-WT
Arhgap9	Late immature cDC1s	392.49	-0.421709	0.111535	-3.78095	0.000156231	0.00140322	1	DKO-WT
Hdac11	Late immature cDC1s	49.2426	-1.07868	0.286377	-3.76663	0.000165464	0.00147533	1	DKO-WT
Traf4	Late immature cDC1s	364.967	-0.523955	0.139222	-3.76344	0.00016759	0.00148996	1	DKO-WT
Ago4	Late immature cDC1s	157.24	-0.60257	0.160679	-3.75016	0.000176725	0.00155762	1	DKO-WT
Mpzl2	Late immature cDC1s	199.238	-0.734669	0.195895	-3.75032	0.000176612	0.00155762	1	DKO-WT
Rab37	Late immature cDC1s	14.4944	-2.12515	0.566808	-3.74932	0.000177312	0.00156055	1	DKO-WT
Gm36933	Late immature cDC1s	138.381	-0.682268	0.182171	-3.74521	0.000180242	0.00158067	1	DKO-WT
Csrp2	Late immature cDC1s	153.464	-0.615049	0.164277	-3.74397	0.000181134	0.00158622	1	DKO-WT
Rere	Late immature cDC1s	465.765	-0.422254	0.113144	-3.732	0.000189964	0.00165333	1	DKO-WT
C130026I21Rik	Late immature cDC1s	83.4806	-0.833301	0.223485	-3.72866	0.000192501	0.00167143	1	DKO-WT
Pacs1	Late immature cDC1s	311.125	-0.451369	0.121358	-3.71931	0.000199767	0.00172475	1	DKO-WT
Ccr7	Late immature cDC1s	134.264	-0.807099	0.217238	-3.71528	0.000202982	0.00174882	1	DKO-WT
Sema7a	Late immature cDC1s	184.811	-0.646009	0.17389	-3.71504	0.000203172	0.00174922	1	DKO-WT
Fas	Late immature cDC1s	105.191	-0.765073	0.205982	-3.71427	0.000203788	0.00175329	1	DKO-WT
Fyco1	Late immature cDC1s	246.276	-0.525947	0.141878	-3.70704	0.000209696	0.00180033	1	DKO-WT
Lysmd3	Late immature cDC1s	332.855	-0.424083	0.114582	-3.70113	0.00021464	0.00183763	1	DKO-WT
Serpinb1a	Late immature cDC1s	61.3533	-1.03607	0.280451	-3.69428	0.000220508	0.00188261	1	DKO-WT
Hmgb1-ps8	Late immature cDC1s	340.599	-0.494171	0.134316	-3.67916	0.000234004	0.00198815	1	DKO-WT
Txndc11	Late immature cDC1s	305.496	-0.521536	0.142097	-3.67029	0.000242272	0.00204845	1	DKO-WT
Stk39	Late immature cDC1s	101.815	-0.791974	0.215966	-3.66713	0.000245293	0.00207113	1	DKO-WT
Myom1	Late immature cDC1s	56.0548	-0.989333	0.269894	-3.66563	0.000246726	0.00208037	1	DKO-WT
Gm38832	Late immature cDC1s	194.113	-0.606044	0.165628	-3.65906	0.000253141	0.00212278	1	DKO-WT
Tmsb15b1	Late immature cDC1s	69.6243	-0.874831	0.239533	-3.65224	0.000259964	0.00216813	1	DKO-WT
Capn7	Late immature cDC1s	309.989	-0.427826	0.117483	-3.64159	0.000270958	0.00225369	1	DKO-WT
Suox	Late immature cDC1s	49.3118	-1.0449	0.287145	-3.63893	0.000273768	0.00227181	1	DKO-WT
Tspoap1	Late immature cDC1s	83.7035	-0.939798	0.2585	-3.63558	0.000277358	0.00229758	1	DKO-WT
F630028O10Rik	Late immature cDC1s	246.777	-0.564832	0.156085	-3.61875	0.000296033	0.00244073	1	DKO-WT
Lag3	Late immature cDC1s	61.9159	-0.973238	0.268997	-3.61802	0.000296863	0.00244593	1	DKO-WT
Gm29438	Late immature cDC1s	59.5443	-0.955603	0.264242	-3.61639	0.000298744	0.00245482	1	DKO-WT
Gm43113	Late immature cDC1s	197.132	-0.55079	0.152422	-3.6136	0.000301977	0.00247641	1	DKO-WT
Miga1	Late immature cDC1s	135.365	-0.622738	0.172462	-3.61087	0.000305173	0.00249761	1	DKO-WT
Ier3	Late immature cDC1s	1749.07	-0.598208	0.166099	-3.60151	0.000316378	0.00257556	1	DKO-WT
Ccl6	Late immature cDC1s	339.478	-0.523175	0.145749	-3.58957	0.00033123	0.00267691	1	DKO-WT
Golga2	Late immature cDC1s	224.342	-0.476479	0.133133	-3.57897	0.000344954	0.0027732	1	DKO-WT
Alms1	Late immature cDC1s	165.49	-0.545883	0.153187	-3.5635	0.000365942	0.00292087	1	DKO-WT
Dhrs3	Late immature cDC1s	48.7067	-1.02496	0.287857	-3.56066	0.000369928	0.00294501	1	DKO-WT
BC049352	Late immature cDC1s	49.0152	-1.01948	0.288013	-3.53971	0.000400571	0.00314808	1	DKO-WT
Ptk2b	Late immature cDC1s	350.388	-0.41453	0.117479	-3.52855	0.000417851	0.00326921	1	DKO-WT
Gm19557	Late immature cDC1s	51.0438	-1.1267	0.320025	-3.52066	0.000430482	0.00333821	1	DKO-WT
Ubtd2	Late immature cDC1s	99.519	-0.694617	0.198524	-3.4989	0.000467177	0.00358422	1	DKO-WT
Palm	Late immature cDC1s	135.033	-0.642036	0.184672	-3.47664	0.000507748	0.0038574	1	DKO-WT
Klra13-ps	Late immature cDC1s	23.1026	-1.46323	0.421941	-3.46784	0.000524659	0.00397056	1	DKO-WT
2810029C07Rik	Late immature cDC1s	34.6917	-1.17388	0.34327	-3.41971	0.00062689	0.00462714	1	DKO-WT
Nfe2l3	Late immature cDC1s	21.9927	-1.45853	0.427138	-3.41466	0.000638611	0.00470515	1	DKO-WT
C2cd3	Late immature cDC1s	402.667	-0.411088	0.120633	-3.40777	0.00065496	0.00481404	1	DKO-WT
Sh3pxd2a	Late immature cDC1s	403.027	-0.426132	0.125076	-3.40698	0.00065687	0.00482229	1	DKO-WT
Gm45828	Late immature cDC1s	172.565	-0.561306	0.164944	-3.403	0.000666503	0.00488131	1	DKO-WT
Cdkn2c	Late immature cDC1s	116.12	-0.658816	0.19363	-3.40245	0.000667852	0.00488827	1	DKO-WT
Gm45033	Late immature cDC1s	93.0594	-0.746284	0.21948	-3.40023	0.000673293	0.00492516	1	DKO-WT
Rsad1	Late immature cDC1s	90.1019	-0.717728	0.211392	-3.39525	0.000685663	0.00500669	1	DKO-WT
Gnpda2	Late immature cDC1s	220.711	-0.461699	0.136308	-3.38717	0.000706184	0.00513817	1	DKO-WT
Insig1	Late immature cDC1s	176.108	-0.5215	0.154048	-3.3853	0.00071101	0.00516369	1	DKO-WT
Ino80c	Late immature cDC1s	266.8	-0.42935	0.126815	-3.38564	0.000710119	0.00516369	1	DKO-WT
Ppef1	Late immature cDC1s	11.9987	-2.02224	0.598407	-3.37936	0.000726537	0.00525239	1	DKO-WT
Usp53	Late immature cDC1s	322.09	-0.407276	0.120559	-3.37823	0.000729549	0.00526443	1	DKO-WT
Cd80	Late immature cDC1s	622.267	-0.413881	0.122682	-3.3736	0.00074192	0.00534113	1	DKO-WT
A930024E05Rik	Late immature cDC1s	78.616	-0.800568	0.238124	-3.36198	0.000773865	0.00554505	1	DKO-WT
Gpr33	Late immature cDC1s	62.9837	-0.827043	0.246493	-3.35523	0.000792983	0.00566548	1	DKO-WT
Zfp791	Late immature cDC1s	20.7694	-1.5085	0.449797	-3.35374	0.000797272	0.0056895	1	DKO-WT
Gm48286	Late immature cDC1s	27.6042	-1.24732	0.372357	-3.34979	0.000808727	0.00576788	1	DKO-WT
Arhgap42	Late immature cDC1s	79.6223	-0.864821	0.258324	-3.34782	0.000814508	0.00580236	1	DKO-WT
Gngt2	Late immature cDC1s	340.482	-0.415048	0.124254	-3.34031	0.000836851	0.00594082	1	DKO-WT
Tubb2b	Late immature cDC1s	401.873	-0.416355	0.124832	-3.33532	0.000852024	0.00603456	1	DKO-WT
Brwd3	Late immature cDC1s	260.562	-0.488836	0.146681	-3.33265	0.000860241	0.00607871	1	DKO-WT
Tex2	Late immature cDC1s	132.661	-0.607538	0.182599	-3.32717	0.000877328	0.00618163	1	DKO-WT
Tpm2	Late immature cDC1s	227.143	-0.491548	0.148106	-3.31888	0.000903779	0.00634249	1	DKO-WT
Cracr2a	Late immature cDC1s	25.5574	-1.38756	0.418105	-3.31868	0.000904439	0.00634349	1	DKO-WT
Ctla2b	Late immature cDC1s	27.6995	-1.24716	0.375883	-3.31795	0.000906801	0.00635642	1	DKO-WT
Gin1	Late immature cDC1s	160.173	-0.536421	0.161905	-3.31319	0.000922386	0.00644356	1	DKO-WT
Nod2	Late immature cDC1s	128.93	-0.622582	0.187946	-3.31255	0.000924481	0.00645084	1	DKO-WT
Hivep2	Late immature cDC1s	217.987	-0.467245	0.141183	-3.3095	0.000934621	0.00651049	1	DKO-WT
Dapk1	Late immature cDC1s	219.31	-0.443812	0.134367	-3.30298	0.000956626	0.00663362	1	DKO-WT
Gm49980	Late immature cDC1s	56.4686	-0.92071	0.279868	-3.2898	0.00100258	0.00688222	1	DKO-WT
Phka2	Late immature cDC1s	208.491	-0.47868	0.145911	-3.28064	0.00103572	0.00707802	1	DKO-WT
Gm47445	Late immature cDC1s	117.427	-0.654726	0.200015	-3.27338	0.00106269	0.00721804	1	DKO-WT
4833407H14Rik	Late immature cDC1s	147.484	-0.571911	0.175182	-3.26467	0.0010959	0.00740669	1	DKO-WT
Egfl8	Late immature cDC1s	75.2381	-0.750086	0.230049	-3.26055	0.00111195	0.00749863	1	DKO-WT
Pdxdc1	Late immature cDC1s	281.132	-0.431495	0.132474	-3.25721	0.00112514	0.00757091	1	DKO-WT
Spef1l	Late immature cDC1s	179.7	-0.487226	0.150259	-3.24257	0.00118456	0.00792722	1	DKO-WT
Gm43305	Late immature cDC1s	538.689	-0.80014	0.246811	-3.24192	0.00118728	0.00794112	1	DKO-WT
Gm37978	Late immature cDC1s	52.1653	-0.865325	0.267435	-3.23565	0.00121367	0.00808232	1	DKO-WT
Rasl2-9	Late immature cDC1s	40	-1.03206	0.319357	-3.23169	0.00123059	0.00818612	1	DKO-WT
Gm47513	Late immature cDC1s	50.9886	-0.982011	0.305004	-3.21967	0.00128339	0.00849131	1	DKO-WT
Cnnm1	Late immature cDC1s	47.9063	-0.900422	0.28016	-3.21395	0.00130922	0.00864352	1	DKO-WT
Gm28043	Late immature cDC1s	82.8879	-0.678845	0.211935	-3.20308	0.00135968	0.0089286	1	DKO-WT
Gm37524	Late immature cDC1s	155.907	-0.515457	0.161167	-3.19827	0.00138252	0.00906889	1	DKO-WT
Sort1	Late immature cDC1s	167.445	-0.563786	0.17653	-3.1937	0.0014046	0.00917932	1	DKO-WT
Wbp1l	Late immature cDC1s	402.492	-0.40108	0.125597	-3.19338	0.00140616	0.00918463	1	DKO-WT
Crybg3	Late immature cDC1s	259.827	-0.420373	0.132037	-3.18375	0.00145379	0.00945544	1	DKO-WT
Apol10b	Late immature cDC1s	77.4432	-0.883407	0.279039	-3.16589	0.0015461	0.0099502	1	DKO-WT
Gm43430	Late immature cDC1s	104.286	-0.61045	0.193187	-3.15989	0.00157831	0.0101207	1	DKO-WT
Slc9a7	Late immature cDC1s	210.146	-0.439096	0.139112	-3.15641	0.00159722	0.0102256	1	DKO-WT
Fkbp1b	Late immature cDC1s	56.8135	-0.859347	0.272538	-3.15313	0.00161531	0.0103306	1	DKO-WT
Tmtc1	Late immature cDC1s	17.131	-1.59869	0.507187	-3.15206	0.00162121	0.0103575	1	DKO-WT
Lrrc28	Late immature cDC1s	164.365	-0.490417	0.156229	-3.13909	0.00169472	0.0107543	1	DKO-WT
Plk3	Late immature cDC1s	1216.77	-0.570395	0.181826	-3.13705	0.00170658	0.0108184	1	DKO-WT
Ccdc189	Late immature cDC1s	12.3911	-1.86651	0.597432	-3.12422	0.00178274	0.0112142	1	DKO-WT
Tpmt	Late immature cDC1s	87.969	-0.653641	0.209538	-3.11944	0.00181195	0.0113571	1	DKO-WT
Cep85l	Late immature cDC1s	249.508	-0.442001	0.142367	-3.10467	0.00190494	0.0118611	1	DKO-WT
Galnt10	Late immature cDC1s	364.687	-0.41139	0.132505	-3.10471	0.00190467	0.0118611	1	DKO-WT
Wrn	Late immature cDC1s	225.469	-0.412222	0.132955	-3.10045	0.00193225	0.0119825	1	DKO-WT
Gm44694	Late immature cDC1s	243.337	-0.445985	0.144045	-3.09615	0.00196051	0.0121332	1	DKO-WT
Fam114a1	Late immature cDC1s	68.599	-0.736602	0.237997	-3.095	0.00196813	0.0121681	1	DKO-WT
Angptl4	Late immature cDC1s	46.3067	-1.0103	0.328776	-3.0729	0.00211989	0.012969	1	DKO-WT
Sdcbp2	Late immature cDC1s	17.6523	-1.44957	0.471811	-3.07236	0.00212375	0.0129796	1	DKO-WT
Gm43329	Late immature cDC1s	132.358	-0.536973	0.174922	-3.06979	0.0021421	0.0130722	1	DKO-WT
Nipal3	Late immature cDC1s	186.46	-0.444318	0.144758	-3.06938	0.00214505	0.0130837	1	DKO-WT
Gm37255	Late immature cDC1s	120.181	-0.566394	0.185271	-3.05712	0.00223478	0.0135568	1	DKO-WT
Gm47508	Late immature cDC1s	34.1096	-1.03869	0.340949	-3.04646	0.00231555	0.0139915	1	DKO-WT
Phtf1	Late immature cDC1s	128.145	-0.530627	0.174641	-3.03839	0.00237843	0.014322	1	DKO-WT
9930022D16Rik	Late immature cDC1s	11.5561	-1.84356	0.607243	-3.03596	0.00239772	0.0143957	1	DKO-WT
Gm43577	Late immature cDC1s	73.5583	-0.692474	0.228837	-3.02606	0.00247761	0.0147813	1	DKO-WT
Gm44951	Late immature cDC1s	56.4251	-0.855539	0.285012	-3.00177	0.00268416	0.0158058	1	DKO-WT
Gm42432	Late immature cDC1s	100.468	-0.597373	0.1991	-3.00036	0.00269661	0.0158716	1	DKO-WT
Cerk	Late immature cDC1s	200.367	-0.460697	0.153722	-2.99695	0.00272696	0.0159811	1	DKO-WT
Gm16014	Late immature cDC1s	34.2659	-1.14449	0.382365	-2.99318	0.00276084	0.0161104	1	DKO-WT
Atg13	Late immature cDC1s	168.429	-0.46539	0.155817	-2.98677	0.00281943	0.0163772	1	DKO-WT
Xdh	Late immature cDC1s	25.4495	-1.20268	0.402998	-2.98432	0.00284206	0.0164902	1	DKO-WT
Gpr31c	Late immature cDC1s	171.479	-0.545441	0.183783	-2.96786	0.00299884	0.0172528	1	DKO-WT
Jun	Late immature cDC1s	3996.48	-0.574183	0.193863	-2.9618	0.0030585	0.0175622	1	DKO-WT
Galnt12	Late immature cDC1s	175.787	-0.455677	0.154093	-2.95715	0.00310496	0.0177799	1	DKO-WT
Gm29340	Late immature cDC1s	16.7822	-1.48055	0.503311	-2.94162	0.003265	0.0185663	1	DKO-WT
Gm37519	Late immature cDC1s	51.8984	-0.781004	0.265575	-2.9408	0.00327364	0.0186068	1	DKO-WT
Arrdc3	Late immature cDC1s	117.267	-0.558824	0.190072	-2.94007	0.00328135	0.0186289	1	DKO-WT
Alpk2	Late immature cDC1s	16.6636	-1.47638	0.502738	-2.93669	0.00331736	0.018803	1	DKO-WT
Lrrc32	Late immature cDC1s	80.5683	-0.664921	0.22773	-2.91977	0.00350288	0.0197088	1	DKO-WT
Nrip3	Late immature cDC1s	18.7948	-1.37281	0.472791	-2.90364	0.00368855	0.0206115	1	DKO-WT
Gm43330	Late immature cDC1s	52.8896	-0.779052	0.268402	-2.90256	0.00370126	0.0206731	1	DKO-WT
Fndc3b	Late immature cDC1s	104.526	-0.571882	0.197985	-2.88851	0.0038707	0.0214728	1	DKO-WT
Slc15a3	Late immature cDC1s	90.5731	-0.675674	0.234424	-2.88227	0.00394819	0.0218335	1	DKO-WT
Ermp1	Late immature cDC1s	224.705	-0.402062	0.139538	-2.88137	0.00395946	0.0218662	1	DKO-WT
Myof	Late immature cDC1s	182.781	-0.438494	0.152342	-2.87836	0.00399745	0.0220462	1	DKO-WT
Igfbp7	Late immature cDC1s	21.7173	-1.62611	0.565399	-2.87605	0.00402686	0.0221785	1	DKO-WT
Gm6225	Late immature cDC1s	57.9604	-0.771575	0.268552	-2.87309	0.00406475	0.0223547	1	DKO-WT
Kdm1b	Late immature cDC1s	161.07	-0.491625	0.171262	-2.87061	0.00409684	0.0224932	1	DKO-WT
Gm37820	Late immature cDC1s	8.75393	-2.01522	0.702746	-2.86764	0.00413543	0.0226644	1	DKO-WT
A930001M01Rik	Late immature cDC1s	60.3051	-0.761205	0.26562	-2.86577	0.00416002	0.0227687	1	DKO-WT
Gm17823	Late immature cDC1s	51.9462	-0.817367	0.28561	-2.86183	0.00421207	0.0229613	1	DKO-WT
Gp2	Late immature cDC1s	102.232	-0.588192	0.205752	-2.85875	0.00425315	0.0231544	1	DKO-WT
C330011M18Rik	Late immature cDC1s	16.5462	-1.44525	0.505675	-2.85807	0.00426225	0.0231833	1	DKO-WT
Cd209a	Late immature cDC1s	64.8739	-0.760424	0.268411	-2.83306	0.00461052	0.0246942	1	DKO-WT
F830112A20Rik	Late immature cDC1s	42.7072	-0.849317	0.29982	-2.83276	0.00461487	0.0246959	1	DKO-WT
Catip	Late immature cDC1s	19.8041	-1.26026	0.444979	-2.83217	0.00462329	0.0247302	1	DKO-WT
Akap7	Late immature cDC1s	117.075	-0.515852	0.182271	-2.83014	0.0046528	0.0247689	1	DKO-WT
Gm48334	Late immature cDC1s	47.6057	-0.804428	0.284348	-2.82902	0.00466902	0.0248293	1	DKO-WT
Slc39a10	Late immature cDC1s	148.106	-0.460904	0.163286	-2.82268	0.00476245	0.0252214	1	DKO-WT
Kif9	Late immature cDC1s	92.0784	-0.572021	0.202763	-2.82113	0.00478543	0.0253104	1	DKO-WT
Gm43328	Late immature cDC1s	86.2981	-0.611574	0.216938	-2.81912	0.00481558	0.025415	1	DKO-WT
Slc24a1	Late immature cDC1s	21.55	-1.3213	0.469144	-2.8164	0.00485656	0.0255542	1	DKO-WT
Clec1b	Late immature cDC1s	201.49	-0.417879	0.148559	-2.81289	0.00490983	0.0258095	1	DKO-WT
Ccl5	Late immature cDC1s	263.255	-0.873305	0.31055	-2.81212	0.00492155	0.0258518	1	DKO-WT
Car2	Late immature cDC1s	17.3187	-1.76904	0.629526	-2.81011	0.00495247	0.025992	1	DKO-WT
Tex9	Late immature cDC1s	196.356	-0.413085	0.14708	-2.80857	0.00497621	0.0260943	1	DKO-WT
Tpcn2	Late immature cDC1s	101.313	-0.563226	0.201041	-2.80154	0.00508591	0.0265672	1	DKO-WT
Zfp36l1	Late immature cDC1s	5488.7	-0.417462	0.149414	-2.794	0.00520609	0.0271141	1	DKO-WT
Taf2	Late immature cDC1s	181.007	-0.427385	0.152974	-2.79384	0.0052086	0.0271149	1	DKO-WT
4931406G06Rik	Late immature cDC1s	16.8118	-1.36423	0.489346	-2.78786	0.00530583	0.0275283	1	DKO-WT
Lpar2	Late immature cDC1s	10.0361	-1.96534	0.705789	-2.7846	0.00535931	0.0277823	1	DKO-WT
Tmem184c	Late immature cDC1s	129.184	-0.490012	0.176282	-2.77971	0.00544079	0.0281452	1	DKO-WT
Coch	Late immature cDC1s	20.2516	-1.46833	0.529483	-2.77314	0.00555187	0.0284993	1	DKO-WT
4930539J05Rik	Late immature cDC1s	13.2407	-1.50448	0.548055	-2.74513	0.00604865	0.03058	1	DKO-WT
Nlrp1c-ps	Late immature cDC1s	48.7983	-0.76023	0.277255	-2.74199	0.00610686	0.0308107	1	DKO-WT
Gm43411	Late immature cDC1s	34.2536	-0.930946	0.339865	-2.73917	0.00615953	0.0309999	1	DKO-WT
Gm12854	Late immature cDC1s	63.0972	-0.794068	0.290139	-2.73685	0.00620299	0.0311675	1	DKO-WT
Bcas3os1	Late immature cDC1s	9.7746	-1.76883	0.647987	-2.72973	0.00633869	0.0317193	1	DKO-WT
Snx29	Late immature cDC1s	182.138	-0.437285	0.160688	-2.72134	0.00650186	0.0324828	1	DKO-WT
Trim14	Late immature cDC1s	59.2299	-0.738907	0.272418	-2.7124	0.00667977	0.0331958	1	DKO-WT
Ncapg2	Late immature cDC1s	111.952	-0.502089	0.185231	-2.71061	0.00671586	0.0333076	1	DKO-WT
Gm43331	Late immature cDC1s	88.5645	-0.581621	0.214909	-2.70636	0.00680249	0.0336556	1	DKO-WT
Myo6	Late immature cDC1s	132.999	-0.508292	0.188175	-2.70116	0.00690978	0.0341038	1	DKO-WT
Cenpa	Late immature cDC1s	207.789	-0.432507	0.1602	-2.6998	0.00693819	0.0342027	1	DKO-WT
Esyt3	Late immature cDC1s	87.4412	-0.574659	0.213026	-2.69759	0.00698429	0.0344023	1	DKO-WT
Eml6	Late immature cDC1s	74.2612	-0.658626	0.244525	-2.69349	0.00707084	0.0347171	1	DKO-WT
Gm15564	Late immature cDC1s	16.1984	-1.49469	0.555839	-2.68906	0.00716529	0.0349986	1	DKO-WT
Gm15506	Late immature cDC1s	23.0897	-1.22303	0.454964	-2.68818	0.0071842	0.035063	1	DKO-WT
Dapk2	Late immature cDC1s	31.1871	-0.932043	0.347118	-2.68509	0.0072511	0.0353473	1	DKO-WT
Rasal2	Late immature cDC1s	72.8969	-0.61813	0.230425	-2.68256	0.00730606	0.0355305	1	DKO-WT
Slc22a21	Late immature cDC1s	123.947	-0.566421	0.211142	-2.68265	0.0073041	0.0355305	1	DKO-WT
Gm3448	Late immature cDC1s	163.603	-0.416443	0.156198	-2.66611	0.00767336	0.0369648	1	DKO-WT
Gm5879	Late immature cDC1s	202.366	-1.14496	0.431559	-2.65309	0.00797587	0.0381671	1	DKO-WT
Pde4a	Late immature cDC1s	154.649	-0.442749	0.167027	-2.65077	0.00803096	0.0383559	1	DKO-WT
Disc1	Late immature cDC1s	143.349	-0.445861	0.168468	-2.64656	0.00813162	0.038716	1	DKO-WT
1810020O05Rik	Late immature cDC1s	73.7661	-0.646007	0.244176	-2.64566	0.00815315	0.0387725	1	DKO-WT
Plekhg3	Late immature cDC1s	141.267	-0.451003	0.170559	-2.64426	0.00818686	0.0388432	1	DKO-WT
Gm28707	Late immature cDC1s	35.4341	-0.881004	0.333482	-2.64183	0.00824589	0.0390931	1	DKO-WT
Pde8a	Late immature cDC1s	221.446	-0.409936	0.155397	-2.63798	0.00834005	0.0394479	1	DKO-WT
Gm44401	Late immature cDC1s	132.064	-0.458702	0.174056	-2.63536	0.00840476	0.0397159	1	DKO-WT
2310001H17Rik	Late immature cDC1s	134.401	-0.451518	0.171367	-2.63481	0.00841856	0.039716	1	DKO-WT
Fmn1	Late immature cDC1s	53.929	-0.713994	0.271222	-2.63251	0.00847575	0.0399	1	DKO-WT
Abcb1a	Late immature cDC1s	27.4224	-0.98642	0.374912	-2.63107	0.00851168	0.0399974	1	DKO-WT
Gm38381	Late immature cDC1s	102.183	-0.529466	0.201638	-2.62582	0.00864397	0.0405188	1	DKO-WT
Ttyh2	Late immature cDC1s	27.4557	-0.97103	0.36981	-2.62575	0.00864577	0.0405188	1	DKO-WT
Gm37321	Late immature cDC1s	11.2582	-1.56466	0.59803	-2.61635	0.00888749	0.0414299	1	DKO-WT
R3hcc1l	Late immature cDC1s	174.132	-0.409955	0.156883	-2.61313	0.00897184	0.0417279	1	DKO-WT
Eda	Late immature cDC1s	21.0055	-1.10699	0.424206	-2.60956	0.00906575	0.0421125	1	DKO-WT
Gm44101	Late immature cDC1s	15.0795	-1.4019	0.53889	-2.60145	0.00928307	0.042996	1	DKO-WT
Mrc1	Late immature cDC1s	13.4718	-1.42956	0.549616	-2.60102	0.00929462	0.0430333	1	DKO-WT
2210406H18Rik	Late immature cDC1s	20.7605	-1.13214	0.435969	-2.59683	0.00940889	0.0434457	1	DKO-WT
9630028I04Rik	Late immature cDC1s	10.8234	-1.62263	0.625172	-2.59549	0.00944569	0.0435471	1	DKO-WT
Trp53inp2	Late immature cDC1s	91.3855	-0.537705	0.207322	-2.59358	0.00949828	0.0436972	1	DKO-WT
C030005K06Rik	Late immature cDC1s	97.754	-0.597136	0.230786	-2.5874	0.00967026	0.0443703	1	DKO-WT
Padi2	Late immature cDC1s	115.991	-0.509851	0.197154	-2.58605	0.00970816	0.0444551	1	DKO-WT
Atp5pb-ps	Late immature cDC1s	29.0344	-0.937664	0.363096	-2.58241	0.00981131	0.0448162	1	DKO-WT
Hap1	Late immature cDC1s	80.0956	-0.584178	0.226992	-2.57356	0.0100658	0.0457311	1	DKO-WT
Krt80	Late immature cDC1s	129.536	-0.470275	0.182746	-2.57338	0.010071	0.0457311	1	DKO-WT
Tgm2	Late immature cDC1s	28.2979	-0.985633	0.383629	-2.56924	0.0101923	0.046195	1	DKO-WT
Ptprh	Late immature cDC1s	26.6304	-0.968237	0.380459	-2.54492	0.0109303	0.0488358	1	DKO-WT
Eepd1	Late immature cDC1s	87.9878	-0.544727	0.214339	-2.54142	0.0110403	0.0492374	1	DKO-WT
Cltrn	Late immature cDC1s	122.676	-0.444654	0.175048	-2.54018	0.0110796	0.0493589	1	DKO-WT
Dpy19l3	Late immature cDC1s	18.9321	-1.16442	0.458757	-2.5382	0.0111425	0.0495314	1	DKO-WT
Mup-ps22	Late immature cDC1s	21.3742	-1.22359	0.48207	-2.5382	0.0111423	0.0495314	1	DKO-WT
1700019L13Rik	Late immature cDC1s	27.5542	-0.936641	0.369115	-2.53754	0.0111636	0.049589	1	DKO-WT
Samd5	Late immature cDC1s	20.8602	-1.14853	0.452792	-2.53656	0.0111949	0.0496741	1	DKO-WT
A730061H03Rik	Late immature cDC1s	23.797	-1.05954	0.417684	-2.5367	0.0111902	0.0496741	1	DKO-WT
Mcm4	Late immature cDC1s	218.407	-0.413582	0.163098	-2.53578	0.0112197	0.04973	1	DKO-WT
Gm6266	Late immature cDC1s	65.2035	-0.605405	0.238798	-2.53522	0.0112376	0.0497704	1	DKO-WT
mt-Co2	Late immature cDC1s	129.287	-0.493798	0.194836	-2.53442	0.0112633	0.0498514	1	DKO-WT

## Sheet: Late immature cDC1s_UP
gene	cluster_id	baseMean	logFC	lfcSE	stat	p_val	p_adj.loc	p_adj.glb	contrast
Ddit3	Late immature cDC1s	1419.16	3.19621	0.0923718	34.6016	2.39159e-262	2.9321e-258	2.93506e-257	DKO-WT
Atf5	Late immature cDC1s	1055.38	5.76144	0.171766	33.5424	1.16254e-246	7.12639e-243	1.42671e-241	DKO-WT
Cdkn1a	Late immature cDC1s	783.086	3.12908	0.114949	27.2215	3.61086e-163	1.47564e-159	4.43132e-158	DKO-WT
Cebpb	Late immature cDC1s	931.589	3.03557	0.119163	25.4742	3.81279e-143	1.16862e-139	4.6791e-138	DKO-WT
Sars	Late immature cDC1s	2181.92	1.96063	0.0771311	25.4195	1.53495e-142	3.76371e-139	1.8837e-137	DKO-WT
Mthfd2	Late immature cDC1s	3452.93	1.69982	0.0677872	25.0759	9.11759e-139	1.86303e-135	1.1189e-133	DKO-WT
Eif4ebp1	Late immature cDC1s	1980.22	2.37804	0.0978921	24.2924	2.3564e-130	4.12707e-127	2.89173e-125	DKO-WT
Manf	Late immature cDC1s	6458.13	1.55211	0.0668633	23.2132	3.34984e-119	5.13363e-116	4.11082e-114	DKO-WT
Shmt2	Late immature cDC1s	526.488	2.84446	0.122617	23.1979	4.77768e-119	6.50826e-116	5.86298e-114	DKO-WT
Hsp90b1	Late immature cDC1s	18047.2	1.68007	0.0739433	22.7211	2.77493e-114	3.40206e-111	3.40525e-109	DKO-WT
Phgdh	Late immature cDC1s	1276.8	5.1302	0.22727	22.5732	7.95691e-113	8.86834e-110	9.76424e-108	DKO-WT
Hspa5	Late immature cDC1s	29652.1	1.72655	0.0772459	22.3514	1.17063e-110	1.19599e-107	1.43651e-105	DKO-WT
Eif2s2	Late immature cDC1s	6193.14	1.18449	0.0547463	21.6359	8.24354e-104	7.77429e-101	1.01157e-98	DKO-WT
Gbp8	Late immature cDC1s	388.287	3.15239	0.146096	21.5775	2.92386e-103	2.56047e-100	3.58784e-98	DKO-WT
Psat1	Late immature cDC1s	487.8	2.9573	0.138239	21.3926	1.56532e-101	1.27938e-98	1.92077e-96	DKO-WT
Ifitm3	Late immature cDC1s	8979.74	1.79056	0.085531	20.9346	2.59407e-97	1.98771e-94	3.18306e-92	DKO-WT
Aars	Late immature cDC1s	850.594	2.03693	0.0990766	20.5591	6.37449e-94	4.59713e-91	7.82169e-89	DKO-WT
Cox6a2	Late immature cDC1s	1617.86	8.06041	0.399755	20.1634	2.0546e-90	1.39941e-87	2.52103e-85	DKO-WT
Calr	Late immature cDC1s	18551.1	1.29371	0.0642352	20.1402	3.28242e-90	2.11802e-87	4.02756e-85	DKO-WT
Pck2	Late immature cDC1s	307.831	3.15214	0.161722	19.4911	1.30744e-84	8.0146e-82	1.60423e-79	DKO-WT
Sdf2l1	Late immature cDC1s	4455.13	1.21891	0.0634659	19.2057	3.31672e-82	1.93634e-79	4.06959e-77	DKO-WT
Yars	Late immature cDC1s	486.425	2.23379	0.117395	19.028	9.9959e-81	5.32825e-78	1.22647e-75	DKO-WT
Cars	Late immature cDC1s	533.21	2.18723	0.114946	19.0283	9.93689e-81	5.32825e-78	1.21924e-75	DKO-WT
Iars	Late immature cDC1s	955.551	1.52416	0.0824459	18.4868	2.63667e-76	1.3469e-73	3.23509e-71	DKO-WT
Gars	Late immature cDC1s	1158.37	1.60798	0.0889217	18.0831	4.3306e-73	2.12373e-70	5.31338e-68	DKO-WT
Asns	Late immature cDC1s	539.252	6.09736	0.340363	17.9143	9.12388e-72	4.30226e-69	1.11944e-66	DKO-WT
Snhg12	Late immature cDC1s	1248.95	1.47894	0.0833544	17.7427	1.96142e-70	8.90632e-68	2.40651e-65	DKO-WT
Pdia6	Late immature cDC1s	4891.14	1.17488	0.0668416	17.5771	3.6907e-69	1.616e-66	4.52808e-64	DKO-WT
Pdia4	Late immature cDC1s	1174.23	1.49566	0.0857591	17.4402	4.08764e-68	1.72808e-65	5.01504e-63	DKO-WT
2410006H16Rik	Late immature cDC1s	7144.41	1.03882	0.0601241	17.278	6.89235e-67	2.81667e-64	8.45602e-62	DKO-WT
Hspa9	Late immature cDC1s	1830.12	1.26476	0.0756532	16.7178	9.72139e-63	3.72451e-60	1.19267e-57	DKO-WT
Pdia3	Late immature cDC1s	8752.8	0.872063	0.0546488	15.9576	2.52313e-57	9.3738e-55	3.0954e-52	DKO-WT
Arpc5l	Late immature cDC1s	3719.28	1.07127	0.0672574	15.9279	4.05804e-57	1.46328e-54	4.97841e-52	DKO-WT
Mars	Late immature cDC1s	413.028	1.78497	0.112573	15.8561	1.27479e-56	4.46542e-54	1.5639e-51	DKO-WT
Aldh18a1	Late immature cDC1s	322.546	2.19773	0.138897	15.8227	2.16897e-56	7.38655e-54	2.66085e-51	DKO-WT
Tars	Late immature cDC1s	757.516	1.43607	0.0932422	15.4015	1.59813e-53	5.29543e-51	1.96049e-48	DKO-WT
Sqstm1	Late immature cDC1s	2873.96	1.42551	0.0926557	15.385	2.06482e-53	6.66177e-51	2.53298e-48	DKO-WT
Slc7a1	Late immature cDC1s	655.662	1.44804	0.0955478	15.1551	7.00715e-52	2.20276e-49	8.59574e-47	DKO-WT
Ormdl2	Late immature cDC1s	1054.88	1.15926	0.077309	14.9951	7.90227e-51	2.42204e-48	9.69371e-46	DKO-WT
Psph	Late immature cDC1s	476.097	1.79752	0.119918	14.9896	8.58112e-51	2.56596e-48	1.05263e-45	DKO-WT
Ghitm	Late immature cDC1s	2717.72	1.03873	0.0697888	14.8839	4.19046e-50	1.22322e-47	5.14011e-45	DKO-WT
Slc1a4	Late immature cDC1s	125.734	4.21249	0.287388	14.6578	1.20066e-48	3.42327e-46	1.47272e-43	DKO-WT
Isyna1	Late immature cDC1s	1351.9	1.09333	0.0746895	14.6384	1.59871e-48	4.4546e-46	1.96095e-43	DKO-WT
Sept11	Late immature cDC1s	440.384	1.58974	0.109701	14.4915	1.37162e-47	3.65565e-45	1.68237e-42	DKO-WT
Sel1l	Late immature cDC1s	1391.78	1.33873	0.0927795	14.4291	3.39432e-47	8.85412e-45	4.1633e-42	DKO-WT
Nars	Late immature cDC1s	3301.33	0.905573	0.064318	14.0796	5.06885e-45	1.26825e-42	6.21699e-40	DKO-WT
Xpot	Late immature cDC1s	438.268	1.78573	0.127917	13.96	2.73345e-44	6.70243e-42	3.35253e-39	DKO-WT
Derl3	Late immature cDC1s	169.736	2.83135	0.205122	13.8032	2.43733e-43	5.74647e-41	2.98926e-38	DKO-WT
Lars	Late immature cDC1s	1361.31	1.13054	0.0825114	13.7016	9.93104e-43	2.29726e-40	1.21797e-37	DKO-WT
Dnajb11	Late immature cDC1s	1970.47	0.947729	0.0695434	13.6279	2.73433e-42	6.20793e-40	3.35341e-37	DKO-WT
Gpt2	Late immature cDC1s	127.505	3.06262	0.227988	13.4332	3.86136e-41	8.60733e-39	4.73557e-36	DKO-WT
Mtss1	Late immature cDC1s	278.404	2.08638	0.155812	13.3904	6.88466e-41	1.50725e-38	8.44328e-36	DKO-WT
Gas5	Late immature cDC1s	13131.5	0.807776	0.0604662	13.3591	1.04778e-40	2.25365e-38	1.28497e-35	DKO-WT
Rcc2	Late immature cDC1s	1294.16	0.949522	0.0721452	13.1613	1.46628e-39	3.04689e-37	1.79813e-34	DKO-WT
Nupr1	Late immature cDC1s	122.058	5.32939	0.414636	12.8532	8.25424e-38	1.68662e-35	1.01216e-32	DKO-WT
Herpud1	Late immature cDC1s	9958.52	0.96794	0.0759772	12.7399	3.54926e-37	7.01837e-35	4.3521e-32	DKO-WT
Soat2	Late immature cDC1s	94.7142	4.26107	0.338881	12.5739	2.93718e-36	5.71585e-34	3.60148e-31	DKO-WT
Chchd10	Late immature cDC1s	486.489	4.53268	0.361036	12.5547	3.7474e-36	7.17861e-34	4.59487e-31	DKO-WT
Krtcap2	Late immature cDC1s	2921.79	1.07268	0.0871925	12.3024	8.78917e-35	1.63266e-32	1.07765e-29	DKO-WT
Eif3c	Late immature cDC1s	4385.56	0.787057	0.0647376	12.1576	5.22413e-34	9.4188e-32	6.4052e-29	DKO-WT
Ccnd2	Late immature cDC1s	130.185	2.61889	0.217734	12.0279	2.53553e-33	4.50515e-31	3.10866e-28	DKO-WT
Tbcb	Late immature cDC1s	2577.75	0.740477	0.0621629	11.9119	1.02641e-32	1.79769e-30	1.25836e-27	DKO-WT
Mthfd1l	Late immature cDC1s	146.923	2.22276	0.192328	11.5572	6.79152e-31	1.15645e-28	8.32546e-26	DKO-WT
Inpp4b	Late immature cDC1s	112.66	2.80318	0.243668	11.5041	1.25753e-30	2.11196e-28	1.54153e-25	DKO-WT
Trib3	Late immature cDC1s	166.074	7.56973	0.6644	11.3933	4.51368e-30	7.47807e-28	5.53282e-25	DKO-WT
Slc6a9	Late immature cDC1s	109.886	6.28962	0.55354	11.3625	6.42535e-30	1.05033e-27	7.876e-25	DKO-WT
Ybx3	Late immature cDC1s	1233.24	0.914413	0.0805591	11.3508	7.34565e-30	1.18497e-27	9.00393e-25	DKO-WT
Eif1	Late immature cDC1s	28887.1	0.581839	0.0516738	11.2598	2.07114e-29	3.29768e-27	2.53863e-24	DKO-WT
Arhgdib	Late immature cDC1s	5302.62	0.647081	0.0575268	11.2483	2.35976e-29	3.70906e-27	2.89238e-24	DKO-WT
Angptl6	Late immature cDC1s	84.6291	3.26369	0.292443	11.1601	6.39364e-29	9.79825e-27	7.83662e-24	DKO-WT
Mif	Late immature cDC1s	2280.97	0.689904	0.0628863	10.9706	5.28918e-28	7.90797e-26	6.48258e-23	DKO-WT
Snhg6	Late immature cDC1s	1460.83	0.782739	0.0713912	10.9641	5.68775e-28	8.40142e-26	6.97102e-23	DKO-WT
Hpgd	Late immature cDC1s	535.684	1.42642	0.130582	10.9235	8.89735e-28	1.28331e-25	1.09046e-22	DKO-WT
Gtpbp2	Late immature cDC1s	696.53	1.1761	0.108751	10.8147	2.93291e-27	4.13304e-25	3.59449e-22	DKO-WT
1110038B12Rik	Late immature cDC1s	564.197	1.05173	0.0972761	10.8118	3.0251e-27	4.21451e-25	3.70744e-22	DKO-WT
Vegfa	Late immature cDC1s	86.024	3.41605	0.31851	10.7251	7.75921e-27	1.06885e-24	9.50923e-22	DKO-WT
Eprs	Late immature cDC1s	2453.17	0.749716	0.0703109	10.6629	1.5184e-26	2.0684e-24	1.86084e-21	DKO-WT
Il6	Late immature cDC1s	108.082	2.74286	0.257371	10.6572	1.61315e-26	2.17332e-24	1.97694e-21	DKO-WT
AC147806.2	Late immature cDC1s	458.278	2.51253	0.239718	10.4812	1.05393e-25	1.3746e-23	1.29148e-20	DKO-WT
Txnip	Late immature cDC1s	708.836	1.05342	0.102197	10.3077	6.50619e-25	8.39641e-23	7.97223e-20	DKO-WT
Fkbp2	Late immature cDC1s	1584.8	0.727257	0.0714331	10.181	2.41181e-24	3.04833e-22	2.95507e-19	DKO-WT
Sesn2	Late immature cDC1s	483.373	1.16137	0.114181	10.1713	2.66313e-24	3.33164e-22	3.26295e-19	DKO-WT
Atf4	Late immature cDC1s	3523.9	0.706415	0.0703316	10.0441	9.75614e-24	1.17265e-21	1.19528e-18	DKO-WT
Ifitm6	Late immature cDC1s	2083.58	2.77119	0.276141	10.0354	1.0652e-23	1.2679e-21	1.30502e-18	DKO-WT
Slc7a11	Late immature cDC1s	78.1525	2.78574	0.282921	9.84634	7.10826e-23	8.29974e-21	8.70776e-18	DKO-WT
Creld1	Late immature cDC1s	163.964	1.70939	0.175425	9.74425	1.95219e-22	2.2161e-20	2.39135e-17	DKO-WT
Nup62	Late immature cDC1s	247.122	1.38016	0.141744	9.737	2.09653e-22	2.32938e-20	2.56808e-17	DKO-WT
Trp53cor1	Late immature cDC1s	61.2072	5.42652	0.56417	9.6186	6.67327e-22	7.11429e-20	8.17343e-17	DKO-WT
Anp32b	Late immature cDC1s	4996.9	0.521957	0.0544044	9.59403	8.47117e-22	8.95316e-20	1.03753e-16	DKO-WT
Nrp1	Late immature cDC1s	226.472	1.47783	0.15433	9.57578	1.01089e-21	1.04147e-19	1.23808e-16	DKO-WT
Pycr1	Late immature cDC1s	56.8435	5.32535	0.560795	9.49606	2.17974e-21	2.17265e-19	2.66941e-16	DKO-WT
Sarnp	Late immature cDC1s	2070.97	0.589006	0.0624698	9.42865	4.15401e-21	4.01009e-19	5.08688e-16	DKO-WT
Arl11	Late immature cDC1s	127.143	2.05563	0.218378	9.41319	4.81303e-21	4.53905e-19	5.89374e-16	DKO-WT
Hax1	Late immature cDC1s	595.752	1.00469	0.107994	9.30317	1.36324e-20	1.26616e-18	1.66925e-15	DKO-WT
Slc35b1	Late immature cDC1s	829.105	0.833648	0.0897055	9.29317	1.49761e-20	1.3805e-18	1.83376e-15	DKO-WT
Gpr183	Late immature cDC1s	326.057	1.2196	0.131571	9.26951	1.86997e-20	1.71088e-18	2.28966e-15	DKO-WT
Ccng1	Late immature cDC1s	744.403	0.862902	0.0935411	9.22484	2.83979e-20	2.5413e-18	3.47704e-15	DKO-WT
Gm15417	Late immature cDC1s	136.482	1.72802	0.187452	9.21846	3.01403e-20	2.67768e-18	3.69031e-15	DKO-WT
Phlda3	Late immature cDC1s	66.4115	2.61402	0.288337	9.06585	1.23636e-19	1.07502e-17	1.51362e-14	DKO-WT
Map3k15	Late immature cDC1s	51.7583	3.32769	0.36909	9.01592	1.95218e-19	1.6506e-17	2.38986e-14	DKO-WT
Slc38a7	Late immature cDC1s	116.143	1.84663	0.204926	9.0112	2.03808e-19	1.71142e-17	2.49499e-14	DKO-WT
Ptma	Late immature cDC1s	30001.4	0.449871	0.0509516	8.8294	1.05242e-18	8.48862e-17	1.28815e-13	DKO-WT
Rps19	Late immature cDC1s	39794.8	0.432746	0.0492968	8.77838	1.6584e-18	1.32889e-16	2.02983e-13	DKO-WT
Cyb5r1	Late immature cDC1s	998.145	0.905996	0.103459	8.75703	2.00471e-18	1.58566e-16	2.45364e-13	DKO-WT
Bbc3	Late immature cDC1s	179.449	1.48767	0.171564	8.67125	4.27411e-18	3.29563e-16	5.23069e-13	DKO-WT
Gdf15	Late immature cDC1s	56.8367	6.00492	0.692702	8.66883	4.36588e-18	3.34536e-16	5.34297e-13	DKO-WT
Slc1a5	Late immature cDC1s	973.259	0.675193	0.0790975	8.53621	1.387e-17	1.03058e-15	1.69726e-12	DKO-WT
Vars	Late immature cDC1s	1092.68	0.697647	0.0826369	8.44232	3.11101e-17	2.28389e-15	3.80682e-12	DKO-WT
Tcea1	Late immature cDC1s	1064.92	0.699491	0.0829367	8.43403	3.33971e-17	2.43719e-15	4.08664e-12	DKO-WT
Bax	Late immature cDC1s	3784.75	0.553209	0.0661833	8.35874	6.33926e-17	4.54499e-15	7.75634e-12	DKO-WT
Cdk6	Late immature cDC1s	300.195	1.01738	0.121938	8.34338	7.21956e-17	5.14604e-15	8.83321e-12	DKO-WT
Rpsa	Late immature cDC1s	78311.1	0.41038	0.0494827	8.2934	1.10061e-16	7.66675e-15	1.34655e-11	DKO-WT
Gpr141	Late immature cDC1s	541.95	1.11928	0.135167	8.28068	1.22474e-16	8.4356e-15	1.4984e-11	DKO-WT
Nfe2l2	Late immature cDC1s	2681.02	0.560532	0.0687586	8.15217	3.57451e-16	2.36884e-14	4.37245e-11	DKO-WT
Npm1	Late immature cDC1s	18441	0.418999	0.0516403	8.11379	4.90638e-16	3.21669e-14	6.00138e-11	DKO-WT
Gsto1	Late immature cDC1s	1327.12	0.725556	0.0897066	8.0881	6.06008e-16	3.95195e-14	7.41239e-11	DKO-WT
Atf3	Late immature cDC1s	6017.89	0.595405	0.0736243	8.08707	6.1119e-16	3.96465e-14	7.47571e-11	DKO-WT
Canx	Late immature cDC1s	3588.1	0.630862	0.0785845	8.02781	9.92268e-16	6.27073e-14	1.21361e-10	DKO-WT
Aen	Late immature cDC1s	280.691	1.01294	0.12665	7.99794	1.26513e-15	7.95412e-14	1.54732e-10	DKO-WT
Sco2	Late immature cDC1s	337.315	0.943835	0.11821	7.98443	1.41175e-15	8.78584e-14	1.72658e-10	DKO-WT
Slc38a2	Late immature cDC1s	2520.08	0.551551	0.0691764	7.97311	1.54731e-15	9.58081e-14	1.89231e-10	DKO-WT
Adm2	Late immature cDC1s	39.6398	5.205	0.654612	7.95127	1.8461e-15	1.13735e-13	2.25767e-10	DKO-WT
Ptger3	Late immature cDC1s	45.1002	5.671	0.715227	7.92895	2.21011e-15	1.34604e-13	2.70274e-10	DKO-WT
Blvrb	Late immature cDC1s	212.299	1.18654	0.15022	7.89867	2.81892e-15	1.67767e-13	3.44692e-10	DKO-WT
Tmem238	Late immature cDC1s	536.506	0.851464	0.108592	7.84097	4.4709e-15	2.62264e-13	5.46634e-10	DKO-WT
Chac1	Late immature cDC1s	462.716	2.06194	0.263883	7.81385	5.54685e-15	3.23723e-13	6.78157e-10	DKO-WT
Slc7a5	Late immature cDC1s	87.16	1.79417	0.229991	7.80104	6.1399e-15	3.53405e-13	7.5064e-10	DKO-WT
Scpep1	Late immature cDC1s	548.255	0.748576	0.0974256	7.68357	1.54714e-14	8.70088e-13	1.89115e-09	DKO-WT
Atp2a2	Late immature cDC1s	1463.74	0.640595	0.0834056	7.68048	1.58497e-14	8.87292e-13	1.93734e-09	DKO-WT
Npm3	Late immature cDC1s	1116.72	0.59142	0.0770945	7.67137	1.70168e-14	9.44011e-13	2.07993e-09	DKO-WT
Ran	Late immature cDC1s	4643.61	0.452926	0.0592533	7.6439	2.10742e-14	1.16383e-12	2.57578e-09	DKO-WT
Hmbs	Late immature cDC1s	261.711	1.02441	0.134151	7.63628	2.23595e-14	1.22378e-12	2.7328e-09	DKO-WT
Tmem205	Late immature cDC1s	433.086	0.843944	0.110568	7.63279	2.2972e-14	1.25172e-12	2.80764e-09	DKO-WT
Pparg	Late immature cDC1s	102.059	1.62712	0.213979	7.60414	2.868e-14	1.54218e-12	3.50506e-09	DKO-WT
Hyi	Late immature cDC1s	578.472	0.807191	0.106633	7.56979	3.73815e-14	1.9926e-12	4.56836e-09	DKO-WT
Ccdc115	Late immature cDC1s	656.559	0.672156	0.0901384	7.45693	8.85617e-14	4.56204e-12	1.08216e-08	DKO-WT
Snhg5	Late immature cDC1s	230.255	1.06211	0.143557	7.39852	1.37708e-13	6.91925e-12	1.68246e-08	DKO-WT
Rgs1	Late immature cDC1s	5781.59	0.557783	0.0754206	7.39564	1.40734e-13	7.04244e-12	1.7194e-08	DKO-WT
Tnfsf9	Late immature cDC1s	294.563	1.06071	0.143488	7.39233	1.44273e-13	7.16107e-12	1.76261e-08	DKO-WT
Rnf130	Late immature cDC1s	1227.04	0.519681	0.0705048	7.37086	1.69531e-13	8.38086e-12	2.07104e-08	DKO-WT
C1qbp	Late immature cDC1s	2283.16	0.45006	0.0616683	7.29807	2.91933e-13	1.39265e-11	3.56567e-08	DKO-WT
Creld2	Late immature cDC1s	949.566	0.710234	0.0975041	7.28414	3.23721e-13	1.52062e-11	3.95373e-08	DKO-WT
Gm43359	Late immature cDC1s	206.262	1.04173	0.14334	7.26753	3.66123e-13	1.70672e-11	4.47146e-08	DKO-WT
Pold4	Late immature cDC1s	3836.18	0.406837	0.0561174	7.24975	4.17538e-13	1.93902e-11	5.09923e-08	DKO-WT
Ddrgk1	Late immature cDC1s	985.868	0.566621	0.078447	7.22297	5.08633e-13	2.33552e-11	6.21143e-08	DKO-WT
Uqcrq	Late immature cDC1s	4766.74	0.451572	0.0625175	7.22313	5.08033e-13	2.33552e-11	6.20415e-08	DKO-WT
Gm42047	Late immature cDC1s	55.213	2.45871	0.340518	7.2205	5.17959e-13	2.36947e-11	6.32526e-08	DKO-WT
Reep6	Late immature cDC1s	30.519	4.83124	0.673682	7.17139	7.42385e-13	3.33393e-11	9.06533e-08	DKO-WT
Snhg1	Late immature cDC1s	1947.77	0.511298	0.0716698	7.13408	9.74351e-13	4.35969e-11	1.18975e-07	DKO-WT
Fdps	Late immature cDC1s	645.439	0.784409	0.110021	7.12962	1.00643e-12	4.48687e-11	1.22892e-07	DKO-WT
Pa2g4	Late immature cDC1s	1703.04	0.48987	0.0687867	7.12158	1.06699e-12	4.73962e-11	1.30284e-07	DKO-WT
Pdgfa	Late immature cDC1s	162.968	1.16844	0.164267	7.11309	1.13475e-12	5.00434e-11	1.38554e-07	DKO-WT
Rhbdd1	Late immature cDC1s	176.435	1.15289	0.162843	7.07979	1.44373e-12	6.29899e-11	1.76267e-07	DKO-WT
Xbp1	Late immature cDC1s	949.302	0.630544	0.0898439	7.01822	2.24715e-12	9.53289e-11	2.74323e-07	DKO-WT
Mid1ip1	Late immature cDC1s	246.879	1.09612	0.156439	7.00671	2.43981e-12	1.03145e-10	2.97833e-07	DKO-WT
Apbb2	Late immature cDC1s	27.9307	4.07605	0.582451	6.9981	2.59451e-12	1.08562e-10	3.16706e-07	DKO-WT
Cd81	Late immature cDC1s	10623.6	0.433308	0.0623891	6.94526	3.77769e-12	1.55941e-10	4.61071e-07	DKO-WT
Rassf8	Late immature cDC1s	106.095	3.14653	0.454244	6.92695	4.30013e-12	1.75732e-10	5.24814e-07	DKO-WT
Epb41l4aos	Late immature cDC1s	636.357	0.616888	0.0892452	6.91229	4.76894e-12	1.93252e-10	5.82016e-07	DKO-WT
Ubald2	Late immature cDC1s	2713.93	0.428582	0.0623071	6.87855	6.04655e-12	2.39905e-10	7.37873e-07	DKO-WT
Farsb	Late immature cDC1s	476.166	0.688011	0.10028	6.8609	6.84288e-12	2.69755e-10	8.35017e-07	DKO-WT
Lmo1	Late immature cDC1s	207.337	1.0458	0.152559	6.8551	7.12649e-12	2.77367e-10	8.69581e-07	DKO-WT
Cdk2ap2	Late immature cDC1s	3302.02	0.443164	0.0648194	6.83691	8.09221e-12	3.11005e-10	9.87363e-07	DKO-WT
Irf2bp2	Late immature cDC1s	1514	0.573124	0.0840171	6.82151	9.00855e-12	3.42996e-10	1.09912e-06	DKO-WT
Eci1	Late immature cDC1s	479.706	0.689954	0.101502	6.79744	1.06496e-11	4.01737e-10	1.2993e-06	DKO-WT
Mt1	Late immature cDC1s	1245.27	0.688548	0.102704	6.70422	2.02482e-11	7.45475e-10	2.46988e-06	DKO-WT
Tmem41b	Late immature cDC1s	289.125	0.811509	0.121163	6.69765	2.11798e-11	7.77438e-10	2.58349e-06	DKO-WT
Bcat2	Late immature cDC1s	670.77	0.632072	0.0945641	6.68406	2.32406e-11	8.45487e-10	2.8347e-06	DKO-WT
Ddit4	Late immature cDC1s	45.2243	2.3513	0.353052	6.65993	2.7396e-11	9.90782e-10	3.34138e-06	DKO-WT
Dgkg	Late immature cDC1s	81.01	1.75738	0.26487	6.63487	3.24786e-11	1.16771e-09	3.96113e-06	DKO-WT
Lyl1	Late immature cDC1s	120.969	1.36477	0.20575	6.63317	3.28564e-11	1.17783e-09	4.00717e-06	DKO-WT
Bri3	Late immature cDC1s	2644.46	0.403635	0.060952	6.62218	3.53931e-11	1.26139e-09	4.3164e-06	DKO-WT
Trmt1	Late immature cDC1s	425.349	0.695814	0.105276	6.60943	3.85808e-11	1.36705e-09	4.705e-06	DKO-WT
Ydjc	Late immature cDC1s	205.089	0.96779	0.146483	6.60683	3.92628e-11	1.38721e-09	4.78814e-06	DKO-WT
Rabepk	Late immature cDC1s	225.313	0.936016	0.142641	6.56202	5.30827e-11	1.83322e-09	6.47274e-06	DKO-WT
Tma16	Late immature cDC1s	248.223	0.844793	0.129271	6.53504	6.35909e-11	2.15366e-09	7.75352e-06	DKO-WT
Aldh1l2	Late immature cDC1s	25.3005	8.03747	1.23138	6.52723	6.6996e-11	2.26273e-09	8.16862e-06	DKO-WT
Stx3	Late immature cDC1s	387.074	0.783826	0.120099	6.52647	6.73382e-11	2.26804e-09	8.21027e-06	DKO-WT
Lamp1	Late immature cDC1s	1291.37	0.521674	0.0799456	6.52536	6.78382e-11	2.27862e-09	8.27117e-06	DKO-WT
Ciart	Late immature cDC1s	61.4328	1.77015	0.271651	6.51628	7.20712e-11	2.39456e-09	8.78692e-06	DKO-WT
Plp2	Late immature cDC1s	925.581	0.519065	0.0803227	6.46225	1.0316e-10	3.35475e-09	1.25756e-05	DKO-WT
Polr2i	Late immature cDC1s	705.685	0.56751	0.0879182	6.45497	1.08239e-10	3.49844e-09	1.31944e-05	DKO-WT
1600002K03Rik	Late immature cDC1s	414.633	0.686939	0.106425	6.4547	1.08434e-10	3.49844e-09	1.32181e-05	DKO-WT
Ifi207	Late immature cDC1s	961.879	0.503768	0.078399	6.42569	1.31271e-10	4.20203e-09	1.60008e-05	DKO-WT
B230217C12Rik	Late immature cDC1s	372.232	0.70892	0.111117	6.37995	1.77151e-10	5.64123e-09	2.15913e-05	DKO-WT
Piga	Late immature cDC1s	114.25	1.41307	0.221581	6.3772	1.80354e-10	5.72835e-09	2.19816e-05	DKO-WT
AI506816	Late immature cDC1s	515.656	0.628823	0.098661	6.37357	1.84681e-10	5.83553e-09	2.25083e-05	DKO-WT
Hyou1	Late immature cDC1s	560.267	0.613208	0.0970835	6.3163	2.67902e-10	8.27323e-09	3.2647e-05	DKO-WT
Mrps18a	Late immature cDC1s	791.653	0.517814	0.0824638	6.27929	3.40124e-10	1.03988e-08	4.14442e-05	DKO-WT
Nktr	Late immature cDC1s	2894.7	0.408514	0.0652172	6.26389	3.7548e-10	1.13945e-08	4.57497e-05	DKO-WT
Vdac3	Late immature cDC1s	1565.28	0.410825	0.06579	6.24449	4.25197e-10	1.28081e-08	5.18026e-05	DKO-WT
Gm43890	Late immature cDC1s	50.6024	1.89279	0.303296	6.24073	4.35521e-10	1.3087e-08	5.30591e-05	DKO-WT
Pdcd2	Late immature cDC1s	483.491	0.638967	0.102503	6.23367	4.55646e-10	1.36583e-08	5.551e-05	DKO-WT
Hmox1	Late immature cDC1s	999.965	0.695228	0.112397	6.18545	6.19263e-10	1.82504e-08	7.54281e-05	DKO-WT
Slc16a14	Late immature cDC1s	18.9044	7.61972	1.2434	6.12813	8.8919e-10	2.59559e-08	0.000108292	DKO-WT
Pla2g12a	Late immature cDC1s	215.385	0.904586	0.147629	6.12743	8.93113e-10	2.60085e-08	0.000108769	DKO-WT
Tmem147	Late immature cDC1s	1060	0.490846	0.0804512	6.10116	1.053e-09	3.04476e-08	0.00012823	DKO-WT
Bccip	Late immature cDC1s	678.293	0.568111	0.0937465	6.06008	1.36052e-09	3.85219e-08	0.000165654	DKO-WT
AI662270	Late immature cDC1s	2905.39	0.408853	0.0682013	5.9948	2.03741e-09	5.63852e-08	0.000248022	DKO-WT
Smim10l1	Late immature cDC1s	500.681	0.647893	0.108422	5.97568	2.29136e-09	6.29868e-08	0.000278923	DKO-WT
Mrpl1	Late immature cDC1s	242.846	0.785233	0.131526	5.97018	2.36996e-09	6.50016e-08	0.000288484	DKO-WT
Srm	Late immature cDC1s	341.387	0.750111	0.126305	5.93886	2.87003e-09	7.76744e-08	0.000349314	DKO-WT
Smn1	Late immature cDC1s	364.844	0.652528	0.109894	5.93779	2.88887e-09	7.80121e-08	0.000351601	DKO-WT
Stt3b	Late immature cDC1s	537.677	0.560571	0.0950928	5.89499	3.747e-09	9.98656e-08	0.000455998	DKO-WT
Mrps28	Late immature cDC1s	995.109	0.472104	0.0801817	5.88793	3.91072e-09	1.03778e-07	0.000475907	DKO-WT
Ndufaf4	Late immature cDC1s	274.349	0.754528	0.128365	5.87799	4.15289e-09	1.09729e-07	0.00050536	DKO-WT
Arl14ep	Late immature cDC1s	159.624	1.07543	0.184409	5.83179	5.48345e-09	1.40937e-07	0.000667155	DKO-WT
Wdr74	Late immature cDC1s	399.939	0.624933	0.107356	5.82114	5.84481e-09	1.49286e-07	0.000711086	DKO-WT
Lst1	Late immature cDC1s	819.473	0.623592	0.107686	5.79086	7.00263e-09	1.77015e-07	0.000851869	DKO-WT
Zfas1	Late immature cDC1s	2115.62	0.409012	0.0707074	5.78458	7.2695e-09	1.83383e-07	0.000884327	DKO-WT
Eef1e1	Late immature cDC1s	838.165	0.469989	0.0813556	5.77697	7.60569e-09	1.90687e-07	0.000925194	DKO-WT
Bcl2	Late immature cDC1s	171.521	0.942019	0.163158	5.77365	7.75741e-09	1.93698e-07	0.000943626	DKO-WT
Tagln2	Late immature cDC1s	3502.22	0.441763	0.0766324	5.76471	8.18007e-09	2.03837e-07	0.000995016	DKO-WT
Echs1	Late immature cDC1s	610.286	0.575975	0.100212	5.74757	9.05366e-09	2.24692e-07	0.00110122	DKO-WT
Josd2	Late immature cDC1s	551.762	0.557687	0.0972922	5.73208	9.92052e-09	2.43739e-07	0.00120657	DKO-WT
Snhg15	Late immature cDC1s	540.053	0.671228	0.117115	5.73134	9.96418e-09	2.4425e-07	0.00121186	DKO-WT
Nfe2l1	Late immature cDC1s	632.099	0.528458	0.0922237	5.73018	1.00324e-08	2.44528e-07	0.00122013	DKO-WT
Rrs1	Late immature cDC1s	305.375	0.673053	0.117831	5.712	1.11658e-08	2.68418e-07	0.00135786	DKO-WT
Anapc16	Late immature cDC1s	826.323	0.492748	0.0864236	5.70154	1.18731e-08	2.84305e-07	0.00144379	DKO-WT
Marc2	Late immature cDC1s	941.921	0.48548	0.0853838	5.68585	1.30161e-08	3.08661e-07	0.00158266	DKO-WT
Eif1ax	Late immature cDC1s	1220.48	0.412264	0.0725501	5.68248	1.32759e-08	3.14213e-07	0.0016142	DKO-WT
Dnaja3	Late immature cDC1s	209.832	0.796954	0.140573	5.66932	1.43363e-08	3.36067e-07	0.00174299	DKO-WT
Prmt7	Late immature cDC1s	177.806	0.860752	0.15204	5.66137	1.50173e-08	3.51359e-07	0.00182574	DKO-WT
Card9	Late immature cDC1s	109.573	1.17376	0.207468	5.65752	1.53575e-08	3.58071e-07	0.00186709	DKO-WT
Wars	Late immature cDC1s	245.753	0.796639	0.141109	5.64555	1.64657e-08	3.82328e-07	0.0020017	DKO-WT
Timm8a1	Late immature cDC1s	149.936	0.960329	0.170781	5.62316	1.87497e-08	4.30471e-07	0.0022792	DKO-WT
Anxa2	Late immature cDC1s	823.684	0.531951	0.0953069	5.58146	2.38513e-08	5.3852e-07	0.00289879	DKO-WT
Hotairm1	Late immature cDC1s	82.2248	1.32738	0.23838	5.56835	2.57161e-08	5.77435e-07	0.0031252	DKO-WT
Casp1	Late immature cDC1s	257.901	0.727055	0.130714	5.56219	2.66415e-08	5.97121e-07	0.00323761	DKO-WT
B4galnt1	Late immature cDC1s	785.165	0.481785	0.0866247	5.56175	2.67089e-08	5.97538e-07	0.00324577	DKO-WT
Ctsc	Late immature cDC1s	1695.33	0.446697	0.0804297	5.55389	2.79384e-08	6.21643e-07	0.00339508	DKO-WT
Saraf	Late immature cDC1s	1061.38	0.425978	0.0767965	5.54685	2.9087e-08	6.44859e-07	0.00353451	DKO-WT
Thrb	Late immature cDC1s	18.8883	5.11468	0.924329	5.5334	3.1409e-08	6.91336e-07	0.00381648	DKO-WT
Asf1a	Late immature cDC1s	253.435	0.75557	0.136667	5.52854	3.22898e-08	7.09449e-07	0.00392343	DKO-WT
Dkc1	Late immature cDC1s	558.702	0.536106	0.0972553	5.51236	3.54049e-08	7.72403e-07	0.00430166	DKO-WT
Ss18l2	Late immature cDC1s	245.18	0.727417	0.132061	5.50817	3.62584e-08	7.89571e-07	0.00440529	DKO-WT
Mef2b	Late immature cDC1s	12.6232	7.03663	1.27869	5.503	3.73379e-08	8.11637e-07	0.00453634	DKO-WT
Ank2	Late immature cDC1s	16.8279	4.5421	0.826648	5.4946	3.91597e-08	8.48228e-07	0.00475758	DKO-WT
Cacna1s	Late immature cDC1s	924.396	0.437803	0.0797782	5.48776	4.07067e-08	8.78633e-07	0.00494537	DKO-WT
Cd37	Late immature cDC1s	1054.82	0.429464	0.078271	5.48688	4.09083e-08	8.81434e-07	0.00496983	DKO-WT
Hspb11	Late immature cDC1s	729.48	0.48073	0.0876619	5.4839	4.16044e-08	8.93292e-07	0.00505431	DKO-WT
Mrpl35	Late immature cDC1s	538.744	0.577319	0.105626	5.46571	4.61051e-08	9.84754e-07	0.00560081	DKO-WT
Sgf29	Late immature cDC1s	304.419	0.731637	0.134038	5.45843	4.80354e-08	1.0242e-06	0.0058351	DKO-WT
Ppp1r14a	Late immature cDC1s	713.896	0.550999	0.101319	5.43827	5.38011e-08	1.14118e-06	0.00653506	DKO-WT
Naa10	Late immature cDC1s	594.402	0.535447	0.0986152	5.42966	5.64611e-08	1.19347e-06	0.00685787	DKO-WT
Ly6a	Late immature cDC1s	429.196	0.773058	0.142489	5.42539	5.78278e-08	1.22026e-06	0.00702376	DKO-WT
Pno1	Late immature cDC1s	422.311	0.600529	0.110839	5.41801	6.02655e-08	1.26733e-06	0.00731972	DKO-WT
Cry1	Late immature cDC1s	125.205	0.990149	0.183051	5.40914	6.33298e-08	1.32496e-06	0.00769153	DKO-WT
Ccnh	Late immature cDC1s	322.388	0.64066	0.118623	5.40082	6.63375e-08	1.38081e-06	0.00805622	DKO-WT
Ndrg1	Late immature cDC1s	192.055	0.945434	0.175084	5.39989	6.66815e-08	1.38562e-06	0.00809794	DKO-WT
Tbl1x	Late immature cDC1s	952.318	0.425493	0.0793741	5.36061	8.29431e-08	1.6948e-06	0.0100705	DKO-WT
Nop14	Late immature cDC1s	683.57	0.497357	0.0928946	5.354	8.60318e-08	1.74917e-06	0.0104451	DKO-WT
Ipo13	Late immature cDC1s	170.318	0.818427	0.154291	5.30445	1.13015e-07	2.27514e-06	0.013719	DKO-WT
Bola3	Late immature cDC1s	582.639	0.507278	0.0958066	5.29481	1.1914e-07	2.3906e-06	0.014462	DKO-WT
Igfbp6	Late immature cDC1s	18.2402	6.59194	1.24915	5.27715	1.31209e-07	2.59456e-06	0.0159254	DKO-WT
Smarcb1	Late immature cDC1s	703.457	0.473826	0.0899321	5.26871	1.37384e-07	2.70793e-06	0.0166737	DKO-WT
Sac3d1	Late immature cDC1s	115.517	0.969106	0.184698	5.24696	1.54628e-07	3.02102e-06	0.0187647	DKO-WT
Nudcd2	Late immature cDC1s	643.587	0.490903	0.0936369	5.24263	1.58306e-07	3.08069e-06	0.01921	DKO-WT
Noc2l	Late immature cDC1s	783.745	0.450797	0.0860532	5.23859	1.61812e-07	3.14392e-06	0.0196351	DKO-WT
Timm9	Late immature cDC1s	297.912	0.638196	0.121872	5.23661	1.63554e-07	3.16772e-06	0.0198459	DKO-WT
Fbxo31	Late immature cDC1s	141.559	0.905948	0.173215	5.23021	1.69321e-07	3.2691e-06	0.0205451	DKO-WT
Gar1	Late immature cDC1s	619.903	0.485005	0.0927624	5.22846	1.70927e-07	3.29492e-06	0.0207396	DKO-WT
Ugp2	Late immature cDC1s	483.51	0.522123	0.10011	5.21547	1.83351e-07	3.49593e-06	0.0222448	DKO-WT
Pknox1	Late immature cDC1s	164.969	0.876579	0.168179	5.21218	1.86632e-07	3.54352e-06	0.0226422	DKO-WT
9130401M01Rik	Late immature cDC1s	562.128	0.50476	0.0969897	5.20426	1.94772e-07	3.68504e-06	0.0236286	DKO-WT
Gabarapl1	Late immature cDC1s	308.408	0.6166	0.118515	5.20271	1.96398e-07	3.71008e-06	0.0238257	DKO-WT
Hspbp1	Late immature cDC1s	217.666	0.721291	0.138794	5.19685	2.0269e-07	3.81718e-06	0.0245877	DKO-WT
Gpx4	Late immature cDC1s	795.923	0.429168	0.0828587	5.17952	2.22458e-07	4.16569e-06	0.026984	DKO-WT
Ifi204	Late immature cDC1s	142.342	0.888469	0.171651	5.17602	2.26673e-07	4.22985e-06	0.0274945	DKO-WT
Prdx3	Late immature cDC1s	851.211	0.420146	0.0812729	5.16957	2.34639e-07	4.37185e-06	0.0284599	DKO-WT
Gm11110	Late immature cDC1s	49.2663	1.51052	0.292256	5.1685	2.35979e-07	4.39015e-06	0.0286222	DKO-WT
1700009J07Rik	Late immature cDC1s	190.109	0.753455	0.146609	5.1392	2.7591e-07	5.10205e-06	0.0334616	DKO-WT
Serpinb10	Late immature cDC1s	260.209	0.667123	0.129944	5.13394	2.83738e-07	5.23103e-06	0.0344092	DKO-WT
Hspe1	Late immature cDC1s	8707.5	0.425088	0.0831914	5.10975	3.22578e-07	5.87956e-06	0.0391142	DKO-WT
Vrk1	Late immature cDC1s	960.125	0.432707	0.0848285	5.10097	3.3792e-07	6.14674e-06	0.0409728	DKO-WT
Mrpl2	Late immature cDC1s	519.533	0.509753	0.0999594	5.09961	3.40362e-07	6.18198e-06	0.0412682	DKO-WT
Enho	Late immature cDC1s	107.309	1.13455	0.222815	5.09188	3.54535e-07	6.40147e-06	0.0429849	DKO-WT
Ctnnbip1	Late immature cDC1s	720.814	0.482433	0.0948782	5.08476	3.68093e-07	6.61703e-06	0.0446272	DKO-WT
Snhg16	Late immature cDC1s	266.781	0.680216	0.133793	5.0841	3.69367e-07	6.63021e-06	0.0447813	DKO-WT
Apex1	Late immature cDC1s	610.8	0.521584	0.102937	5.06701	4.04103e-07	7.22202e-06	0.0489882	DKO-WT
Wdr12	Late immature cDC1s	511.428	0.51761	0.102196	5.06485	4.08717e-07	7.2818e-06	0.0495458	DKO-WT
S100a10	Late immature cDC1s	277.532	0.682381	0.135039	5.0532	4.34459e-07	7.66473e-06	0.0526625	DKO-WT
Mndal	Late immature cDC1s	208.752	0.86305	0.171177	5.04185	4.61051e-07	8.10974e-06	0.0558817	DKO-WT
Chchd6	Late immature cDC1s	313.561	0.633648	0.125846	5.03511	4.77571e-07	8.37628e-06	0.0578816	DKO-WT
Bhlhe40	Late immature cDC1s	565.592	0.542696	0.10808	5.02126	5.13334e-07	8.95231e-06	0.0622125	DKO-WT
Pop5	Late immature cDC1s	805.766	0.425662	0.0847855	5.02046	5.15473e-07	8.97684e-06	0.0624712	DKO-WT
Rpsa-ps10	Late immature cDC1s	438.663	0.531397	0.106506	4.98938	6.05728e-07	1.04155e-05	0.0734009	DKO-WT
Dyrk3	Late immature cDC1s	38.1894	1.65347	0.334255	4.94674	7.54658e-07	1.28323e-05	0.0914298	DKO-WT
Nus1	Late immature cDC1s	808.813	0.489632	0.099064	4.94258	7.70962e-07	1.30733e-05	0.0933997	DKO-WT
Mrps22	Late immature cDC1s	119.779	0.936689	0.189602	4.94029	7.80051e-07	1.32091e-05	0.0944985	DKO-WT
Lgmn	Late immature cDC1s	381.869	0.590997	0.119875	4.93011	8.21827e-07	1.38591e-05	0.0995528	DKO-WT
Lancl1	Late immature cDC1s	203.205	0.749061	0.152046	4.92655	8.3693e-07	1.40732e-05	0.101381	DKO-WT
Rps16-ps2	Late immature cDC1s	354.306	0.562776	0.11433	4.92238	8.54998e-07	1.43396e-05	0.103568	DKO-WT
Batf	Late immature cDC1s	196.757	0.747611	0.152017	4.91795	8.74565e-07	1.46478e-05	0.105936	DKO-WT
2310009B15Rik	Late immature cDC1s	576.565	0.454346	0.0925768	4.90778	9.21142e-07	1.53232e-05	0.111571	DKO-WT
Nit2	Late immature cDC1s	271.564	0.60417	0.123922	4.8754	1.08586e-06	1.78933e-05	0.131496	DKO-WT
Pdxk	Late immature cDC1s	680.31	0.466669	0.0957374	4.87447	1.09102e-06	1.79301e-05	0.132119	DKO-WT
Gclm	Late immature cDC1s	390.732	0.527306	0.108634	4.85395	1.21023e-06	1.9757e-05	0.146533	DKO-WT
Klf10	Late immature cDC1s	121.085	0.875481	0.181146	4.83302	1.34476e-06	2.17504e-05	0.162793	DKO-WT
Med7	Late immature cDC1s	358.042	0.567	0.117435	4.82819	1.37777e-06	2.2177e-05	0.166784	DKO-WT
Hscb	Late immature cDC1s	428.215	0.504796	0.105324	4.79279	1.64477e-06	2.59857e-05	0.19906	DKO-WT
Myg1	Late immature cDC1s	308.372	0.556273	0.116286	4.78367	1.72121e-06	2.70539e-05	0.208301	DKO-WT
Mea1	Late immature cDC1s	713.951	0.47283	0.0988778	4.78196	1.73595e-06	2.72506e-05	0.210081	DKO-WT
Gadd45a	Late immature cDC1s	72.4951	1.33249	0.27931	4.77063	1.83648e-06	2.87551e-05	0.222232	DKO-WT
D030056L22Rik	Late immature cDC1s	194.106	0.683995	0.143745	4.75838	1.95153e-06	3.03627e-05	0.236143	DKO-WT
Cd300a	Late immature cDC1s	613.165	0.509513	0.107286	4.7491	2.0432e-06	3.16283e-05	0.247219	DKO-WT
Slc7a3	Late immature cDC1s	12.3577	4.52224	0.957766	4.72165	2.33939e-06	3.58064e-05	0.283001	DKO-WT
Noa1	Late immature cDC1s	199.965	0.670372	0.142017	4.72037	2.35417e-06	3.59877e-05	0.284786	DKO-WT
Prxl2c	Late immature cDC1s	294.142	0.575755	0.122056	4.71715	2.39173e-06	3.64257e-05	0.289321	DKO-WT
Slc25a33	Late immature cDC1s	783.302	1.02848	0.218321	4.71087	2.46659e-06	3.75192e-05	0.298362	DKO-WT
Rbpms	Late immature cDC1s	31.7652	1.70471	0.361902	4.71041	2.47219e-06	3.75577e-05	0.299036	DKO-WT
Mrto4	Late immature cDC1s	615.878	0.438032	0.0933536	4.69218	2.70306e-06	4.07119e-05	0.326918	DKO-WT
Timm10	Late immature cDC1s	470.615	0.460138	0.098107	4.69017	2.72984e-06	4.10648e-05	0.330152	DKO-WT
Pkig	Late immature cDC1s	275.565	0.657758	0.140976	4.66574	3.0751e-06	4.56732e-05	0.371838	DKO-WT
Sirt3	Late immature cDC1s	251.735	0.606729	0.130347	4.65472	3.24424e-06	4.79209e-05	0.392254	DKO-WT
Brix1	Late immature cDC1s	501.655	0.495192	0.106422	4.65308	3.27014e-06	4.82454e-05	0.395383	DKO-WT
Ctsl	Late immature cDC1s	105.443	0.918031	0.197505	4.64814	3.34936e-06	4.92364e-05	0.404951	DKO-WT
Zbtb18	Late immature cDC1s	191.798	0.725874	0.156326	4.64333	3.42842e-06	5.0278e-05	0.414496	DKO-WT
Mfsd1	Late immature cDC1s	547.795	0.432328	0.0931251	4.64244	3.44311e-06	5.04331e-05	0.416268	DKO-WT
Surf2	Late immature cDC1s	229.12	0.642398	0.138771	4.62919	3.67107e-06	5.33895e-05	0.443785	DKO-WT
Cebpd	Late immature cDC1s	99.6727	0.921996	0.199294	4.62631	3.72237e-06	5.40714e-05	0.449975	DKO-WT
Mrrf	Late immature cDC1s	190.117	0.711609	0.153837	4.62572	3.73292e-06	5.41605e-05	0.451243	DKO-WT
Rabggtb	Late immature cDC1s	464.219	0.458761	0.0993886	4.61583	3.91536e-06	5.64734e-05	0.473258	DKO-WT
Pim3	Late immature cDC1s	284.019	0.611095	0.132821	4.60089	4.20694e-06	6.05365e-05	0.50848	DKO-WT
Thoc1	Late immature cDC1s	341.206	0.519114	0.11297	4.59517	4.32403e-06	6.20757e-05	0.522611	DKO-WT
Apip	Late immature cDC1s	570.946	0.488247	0.106473	4.58563	4.52624e-06	6.45252e-05	0.547001	DKO-WT
Faf1	Late immature cDC1s	381.646	0.495445	0.108105	4.58299	4.58376e-06	6.52694e-05	0.553948	DKO-WT
Agpat2	Late immature cDC1s	57.2651	1.22449	0.26734	4.58027	4.64378e-06	6.59707e-05	0.561177	DKO-WT
Emb	Late immature cDC1s	92.1846	1.00489	0.219477	4.57856	4.68178e-06	6.64337e-05	0.565766	DKO-WT
Sypl	Late immature cDC1s	409.103	0.511329	0.111718	4.57695	4.71811e-06	6.67945e-05	0.570142	DKO-WT
Pfdn4	Late immature cDC1s	663.326	0.40198	0.0880109	4.56739	4.93842e-06	6.9672e-05	0.596739	DKO-WT
Ifrd2	Late immature cDC1s	81.0772	1.1637	0.255019	4.5632	5.03787e-06	7.09262e-05	0.608746	DKO-WT
Mcemp1	Late immature cDC1s	58.5618	1.47389	0.323223	4.55999	5.1157e-06	7.16782e-05	0.618125	DKO-WT
Exosc1	Late immature cDC1s	418.712	0.480815	0.105493	4.55778	5.16982e-06	7.2189e-05	0.624638	DKO-WT
5430416N02Rik	Late immature cDC1s	125.281	0.813856	0.178996	4.54678	5.44734e-06	7.57283e-05	0.65811	DKO-WT
Mroh1	Late immature cDC1s	230.267	0.618812	0.136109	4.54644	5.45605e-06	7.57545e-05	0.659151	DKO-WT
Dhrs7	Late immature cDC1s	413.437	0.50172	0.110512	4.53998	5.62601e-06	7.77619e-05	0.679644	DKO-WT
Resf1	Late immature cDC1s	987.331	0.501115	0.110652	4.52876	5.93295e-06	8.16363e-05	0.716665	DKO-WT
Mrps31	Late immature cDC1s	163.288	0.700957	0.154863	4.52632	6.00198e-06	8.24936e-05	0.724979	DKO-WT
Eif1ad	Late immature cDC1s	664.958	0.446584	0.098924	4.51441	6.34923e-06	8.63946e-05	0.766822	DKO-WT
Sell	Late immature cDC1s	208.513	0.870039	0.193414	4.49832	6.8494e-06	9.23802e-05	0.827099	DKO-WT
Cebpg	Late immature cDC1s	907.996	0.990904	0.221312	4.4774	7.55559e-06	0.000101016	0.912225	DKO-WT
Tubb4b	Late immature cDC1s	329.201	0.616682	0.137929	4.47101	7.78514e-06	0.000103669	0.939893	DKO-WT
Fbxl6	Late immature cDC1s	387.588	0.501457	0.112184	4.46994	7.82403e-06	0.000103812	0.944548	DKO-WT
Hpgds	Late immature cDC1s	149.929	0.787149	0.176516	4.45938	8.21988e-06	0.000108829	0.992304	DKO-WT
Ctnnd1	Late immature cDC1s	242.674	0.587963	0.132053	4.45249	8.48811e-06	0.000112138	1	DKO-WT
Apobec1	Late immature cDC1s	19.0947	2.17484	0.489731	4.44088	8.95937e-06	0.000117856	1	DKO-WT
Mrps18b	Late immature cDC1s	605.598	0.427702	0.0966161	4.42682	9.56345e-06	0.000124865	1	DKO-WT
Igsf8	Late immature cDC1s	117.174	0.834895	0.188818	4.42168	9.79343e-06	0.000127731	1	DKO-WT
Ctbp2	Late immature cDC1s	325.423	0.518112	0.117199	4.42079	9.83417e-06	0.000128126	1	DKO-WT
Clpp	Late immature cDC1s	467.296	0.447847	0.101535	4.41078	1.03e-05	0.000133205	1	DKO-WT
Rrp15	Late immature cDC1s	297.229	0.557702	0.127241	4.38304	1.17037e-05	0.000149622	1	DKO-WT
Mbd6	Late immature cDC1s	283.683	0.588893	0.134605	4.37496	1.21455e-05	0.000154786	1	DKO-WT
Prps1	Late immature cDC1s	237.794	0.586634	0.134403	4.36474	1.27274e-05	0.000161865	1	DKO-WT
Ccdc22	Late immature cDC1s	112.255	0.828113	0.190141	4.35525	1.32914e-05	0.000168339	1	DKO-WT
Htra2	Late immature cDC1s	504.391	0.431237	0.0990254	4.35481	1.33183e-05	0.000168505	1	DKO-WT
Fcer1g	Late immature cDC1s	723.987	0.483389	0.111067	4.35223	1.34758e-05	0.000170147	1	DKO-WT
Prmt3	Late immature cDC1s	322.43	0.506472	0.116393	4.3514	1.35269e-05	0.000170617	1	DKO-WT
Aimp2	Late immature cDC1s	239.545	0.564967	0.129865	4.35042	1.35874e-05	0.000171205	1	DKO-WT
Ccdc117	Late immature cDC1s	183.333	0.800397	0.184069	4.34836	1.37162e-05	0.000172472	1	DKO-WT
Yif1b	Late immature cDC1s	709.547	0.405326	0.0934265	4.33845	1.43494e-05	0.000179513	1	DKO-WT
Atad3a	Late immature cDC1s	253.179	0.601775	0.138849	4.33404	1.46401e-05	0.000182591	1	DKO-WT
Zbtb7b	Late immature cDC1s	238.717	0.605983	0.140019	4.32787	1.5056e-05	0.000187018	1	DKO-WT
Psmf1	Late immature cDC1s	314.508	0.511638	0.118677	4.31117	1.62392e-05	0.000200496	1	DKO-WT
Ank	Late immature cDC1s	48.4472	1.28928	0.299683	4.30215	1.69152e-05	0.000208004	1	DKO-WT
Mphosph10	Late immature cDC1s	573.301	0.466582	0.108704	4.29223	1.7689e-05	0.000216003	1	DKO-WT
Rangrf	Late immature cDC1s	159.78	0.692033	0.161317	4.2899	1.78752e-05	0.00021806	1	DKO-WT
Ryr1	Late immature cDC1s	487.359	0.471764	0.110044	4.28704	1.81066e-05	0.000220225	1	DKO-WT
H1f2	Late immature cDC1s	825.987	0.456334	0.106569	4.28206	1.85168e-05	0.000224992	1	DKO-WT
Plxna1	Late immature cDC1s	30.3427	1.72472	0.403826	4.27095	1.94645e-05	0.000235806	1	DKO-WT
Nipsnap3b	Late immature cDC1s	522.648	0.411006	0.0962608	4.26971	1.95727e-05	0.000236648	1	DKO-WT
Trim46	Late immature cDC1s	9.05594	5.56669	1.30638	4.26117	2.03363e-05	0.000244435	1	DKO-WT
Rrp1b	Late immature cDC1s	157.432	0.721479	0.16939	4.25928	2.05089e-05	0.000246027	1	DKO-WT
Desi2	Late immature cDC1s	460.383	0.446624	0.105085	4.25013	2.13642e-05	0.000254543	1	DKO-WT
Ddx27	Late immature cDC1s	582.264	0.403256	0.0949051	4.24904	2.14688e-05	0.000255541	1	DKO-WT
Nop56	Late immature cDC1s	467.732	0.440937	0.103795	4.24815	2.15544e-05	0.000256311	1	DKO-WT
Cenpw	Late immature cDC1s	77.4555	1.01982	0.240471	4.24094	2.2259e-05	0.000262905	1	DKO-WT
Pdha1	Late immature cDC1s	353.637	0.537221	0.126992	4.23036	2.3332e-05	0.000273995	1	DKO-WT
Impact	Late immature cDC1s	473.88	0.444974	0.105356	4.22354	2.40497e-05	0.000280542	1	DKO-WT
2210408F21Rik	Late immature cDC1s	29.6553	1.60933	0.381132	4.2225	2.41605e-05	0.000281284	1	DKO-WT
AC167036.1	Late immature cDC1s	10.083	3.73444	0.889117	4.20017	2.66719e-05	0.00030704	1	DKO-WT
Ndufv1	Late immature cDC1s	675.792	0.431093	0.102705	4.1974	2.69995e-05	0.000310228	1	DKO-WT
Srfbp1	Late immature cDC1s	190.162	0.651261	0.155401	4.19083	2.77935e-05	0.000318456	1	DKO-WT
Ppil3	Late immature cDC1s	421.455	0.446122	0.106492	4.18924	2.7989e-05	0.000320302	1	DKO-WT
Mrps35	Late immature cDC1s	380.849	0.458311	0.109514	4.18497	2.85204e-05	0.000325568	1	DKO-WT
Zfp467	Late immature cDC1s	69.9714	1.06547	0.254626	4.18446	2.85844e-05	0.000325995	1	DKO-WT
Klf13	Late immature cDC1s	858.143	0.464766	0.111112	4.18286	2.87863e-05	0.000327688	1	DKO-WT
C130089K02Rik	Late immature cDC1s	39.6708	1.35982	0.32523	4.1811	2.901e-05	0.000329767	1	DKO-WT
Psmg1	Late immature cDC1s	259.212	0.544373	0.130287	4.17826	2.93747e-05	0.000333149	1	DKO-WT
Clec5a	Late immature cDC1s	17.1548	2.24251	0.540332	4.15024	3.32122e-05	0.000371038	1	DKO-WT
Mgmt	Late immature cDC1s	72.1438	1.06963	0.257845	4.14834	3.34895e-05	0.000372957	1	DKO-WT
Tctex1d2	Late immature cDC1s	332.441	0.49101	0.118364	4.14832	3.34931e-05	0.000372957	1	DKO-WT
Il3ra	Late immature cDC1s	196.747	0.621147	0.150063	4.13923	3.48476e-05	0.000385241	1	DKO-WT
Nop16	Late immature cDC1s	369.867	0.446377	0.107873	4.13797	3.50386e-05	0.000386655	1	DKO-WT
Mvd	Late immature cDC1s	156.416	0.70166	0.169902	4.1298	3.63078e-05	0.000398865	1	DKO-WT
Znhit6	Late immature cDC1s	296.334	0.504693	0.122261	4.12799	3.65946e-05	0.000400938	1	DKO-WT
Mrpl22	Late immature cDC1s	350.298	0.531719	0.129379	4.10977	3.96059e-05	0.000430087	1	DKO-WT
Gm15050	Late immature cDC1s	15.7826	2.25744	0.550456	4.10104	4.11304e-05	0.00044428	1	DKO-WT
Nob1	Late immature cDC1s	350.448	0.473951	0.115608	4.09963	4.13819e-05	0.000446211	1	DKO-WT
Gm6563	Late immature cDC1s	134.767	0.731905	0.179151	4.08541	4.39988e-05	0.000470293	1	DKO-WT
Tmx2	Late immature cDC1s	182.622	0.607432	0.148779	4.08278	4.45006e-05	0.000475242	1	DKO-WT
Bmi1	Late immature cDC1s	196.62	0.595864	0.146351	4.07147	4.67165e-05	0.00049537	1	DKO-WT
Mrpl45	Late immature cDC1s	333.359	0.490714	0.120592	4.06921	4.71724e-05	0.000498994	1	DKO-WT
Maip1	Late immature cDC1s	279.775	0.496248	0.122464	4.0522	5.07385e-05	0.000532125	1	DKO-WT
Prmt5	Late immature cDC1s	184.489	0.616849	0.152471	4.04568	5.21718e-05	0.000544362	1	DKO-WT
Cep85	Late immature cDC1s	129.157	0.712392	0.176354	4.03957	5.35497e-05	0.000555902	1	DKO-WT
Dcps	Late immature cDC1s	433.84	0.419846	0.103982	4.03768	5.39823e-05	0.000559918	1	DKO-WT
Rpp38	Late immature cDC1s	91.4297	0.861713	0.213902	4.02854	5.61236e-05	0.000580655	1	DKO-WT
Gsr	Late immature cDC1s	461.071	0.513784	0.127577	4.02726	5.64316e-05	0.000582516	1	DKO-WT
Tbccd1	Late immature cDC1s	112.909	0.786387	0.195279	4.027	5.64936e-05	0.000582516	1	DKO-WT
Atp13a3	Late immature cDC1s	475.77	0.414505	0.102927	4.02718	5.64487e-05	0.000582516	1	DKO-WT
H2-Bl	Late immature cDC1s	10.4171	3.40928	0.848603	4.01752	5.8813e-05	0.000601876	1	DKO-WT
Nfil3	Late immature cDC1s	759.643	0.401241	0.0999042	4.01626	5.91296e-05	0.000604611	1	DKO-WT
Tspan17	Late immature cDC1s	99.1421	0.860079	0.214299	4.01346	5.98356e-05	0.000611321	1	DKO-WT
Ly9	Late immature cDC1s	309.718	0.464188	0.115824	4.00771	6.13104e-05	0.000625346	1	DKO-WT
Mrpl38	Late immature cDC1s	440.326	0.405677	0.10133	4.00351	6.24086e-05	0.00063549	1	DKO-WT
Rrp9	Late immature cDC1s	207.89	0.588077	0.147055	3.99902	6.36051e-05	0.000645704	1	DKO-WT
Ube2l6	Late immature cDC1s	159.462	0.642665	0.160843	3.9956	6.4531e-05	0.000653843	1	DKO-WT
Crcp	Late immature cDC1s	355.678	0.468026	0.117178	3.99414	6.49284e-05	0.00065649	1	DKO-WT
Phb	Late immature cDC1s	205.883	0.56686	0.142417	3.9803	6.88291e-05	0.000689416	1	DKO-WT
Mrpl44	Late immature cDC1s	211.716	0.572598	0.144001	3.97636	6.9978e-05	0.000696372	1	DKO-WT
Ppid	Late immature cDC1s	368.281	0.467059	0.117653	3.96982	7.19275e-05	0.000714034	1	DKO-WT
Phkg2	Late immature cDC1s	423.594	0.411511	0.10371	3.9679	7.25094e-05	0.000719228	1	DKO-WT
Mrpl39	Late immature cDC1s	249.005	0.532116	0.134139	3.9669	7.2812e-05	0.000721646	1	DKO-WT
Gm1966	Late immature cDC1s	165.426	0.654301	0.165243	3.95963	7.50646e-05	0.000740976	1	DKO-WT
Lyve1	Late immature cDC1s	16.6682	2.0862	0.529652	3.93881	8.18851e-05	0.000801359	1	DKO-WT
Dusp7	Late immature cDC1s	39.1231	1.25528	0.318966	3.93547	8.30349e-05	0.000809267	1	DKO-WT
Slc19a2	Late immature cDC1s	39.0568	1.24273	0.316372	3.92808	8.56262e-05	0.00083052	1	DKO-WT
Tbc1d31	Late immature cDC1s	280.545	0.551172	0.140382	3.92622	8.62907e-05	0.000836304	1	DKO-WT
Tubb3	Late immature cDC1s	24.3393	1.81751	0.464197	3.9154	9.02559e-05	0.000871976	1	DKO-WT
Timm50	Late immature cDC1s	431.205	0.403592	0.103356	3.90487	9.42767e-05	0.000906535	1	DKO-WT
Adsl	Late immature cDC1s	278.161	0.50107	0.128892	3.88751	0.00010128	0.000965546	1	DKO-WT
Mrpl23	Late immature cDC1s	104.294	0.743038	0.191398	3.88216	0.000103533	0.000983961	1	DKO-WT
B3gnt5	Late immature cDC1s	232.198	0.535429	0.138086	3.87751	0.000105533	0.00100036	1	DKO-WT
Casp4	Late immature cDC1s	59.228	1.00225	0.258956	3.87034	0.000108682	0.00102812	1	DKO-WT
Dtd1	Late immature cDC1s	220.565	0.526587	0.13608	3.86968	0.00010898	0.00103015	1	DKO-WT
Med19	Late immature cDC1s	302.424	0.458031	0.118392	3.86876	0.00010939	0.00103322	1	DKO-WT
Rps24-ps3	Late immature cDC1s	232.546	0.53631	0.138742	3.86553	0.000110849	0.00104393	1	DKO-WT
Eef1akmt4	Late immature cDC1s	236.721	0.532026	0.137635	3.86549	0.000110865	0.00104393	1	DKO-WT
Tmem154	Late immature cDC1s	40.3477	1.22318	0.317052	3.85797	0.000114334	0.00107248	1	DKO-WT
Kat8	Late immature cDC1s	159.428	0.660737	0.171319	3.85678	0.000114893	0.0010769	1	DKO-WT
Rab28	Late immature cDC1s	334.888	0.441973	0.114836	3.84872	0.000118739	0.00110772	1	DKO-WT
Pgam5	Late immature cDC1s	164.21	0.600916	0.156151	3.8483	0.000118938	0.00110804	1	DKO-WT
Pogk	Late immature cDC1s	53.3139	1.07119	0.279041	3.83881	0.00012363	0.0011462	1	DKO-WT
Cybc1	Late immature cDC1s	788.995	0.444312	0.115757	3.83832	0.000123878	0.0011462	1	DKO-WT
Gm20559	Late immature cDC1s	137.854	0.666824	0.173763	3.83755	0.00012427	0.00114811	1	DKO-WT
Plxnb2	Late immature cDC1s	136.706	0.72398	0.188883	3.83295	0.000126617	0.00116804	1	DKO-WT
Hibch	Late immature cDC1s	219.569	0.540822	0.141133	3.832	0.000127103	0.00117164	1	DKO-WT
Dnpep	Late immature cDC1s	338.913	0.43798	0.114478	3.82588	0.000130307	0.00119847	1	DKO-WT
Tyms	Late immature cDC1s	135.226	0.721326	0.188894	3.81868	0.000134167	0.00122936	1	DKO-WT
Stard10	Late immature cDC1s	152.595	0.62854	0.164941	3.8107	0.000138573	0.00126407	1	DKO-WT
Gm13436	Late immature cDC1s	287.719	0.470272	0.12364	3.80355	0.000142637	0.00129728	1	DKO-WT
Dimt1	Late immature cDC1s	181.574	0.570983	0.150457	3.795	0.000147645	0.00133687	1	DKO-WT
Rbm38	Late immature cDC1s	164.277	0.608536	0.160659	3.78776	0.00015201	0.00137335	1	DKO-WT
Fndc5	Late immature cDC1s	959.339	0.427948	0.112992	3.7874	0.000152229	0.00137432	1	DKO-WT
Slc48a1	Late immature cDC1s	358.539	0.436017	0.115159	3.7862	0.000152966	0.00137793	1	DKO-WT
Ripk2	Late immature cDC1s	62.6533	0.979311	0.258764	3.78458	0.000153971	0.00138495	1	DKO-WT
Carnmt1	Late immature cDC1s	333.638	0.430867	0.114062	3.77746	0.000158434	0.00141988	1	DKO-WT
Vegfb	Late immature cDC1s	233.017	0.520766	0.137878	3.77701	0.000158719	0.00142036	1	DKO-WT
Jdp2	Late immature cDC1s	2027.69	0.839904	0.222517	3.77456	0.000160291	0.00143234	1	DKO-WT
Gm9800	Late immature cDC1s	185.405	0.595101	0.158011	3.76619	0.000165755	0.00147686	1	DKO-WT
Psen2	Late immature cDC1s	348.425	0.445409	0.118571	3.75646	0.000172335	0.00152771	1	DKO-WT
Arl2	Late immature cDC1s	277.878	0.481751	0.128334	3.75389	0.000174114	0.00153903	1	DKO-WT
Ruvbl2	Late immature cDC1s	262.097	0.475312	0.126689	3.75181	0.000175563	0.00154961	1	DKO-WT
Wdr75	Late immature cDC1s	295.747	0.448778	0.119844	3.74467	0.00018063	0.00158294	1	DKO-WT
Slc44a1	Late immature cDC1s	217.84	0.547809	0.146522	3.73876	0.000184934	0.00161718	1	DKO-WT
Snhg17	Late immature cDC1s	103.708	0.757109	0.202542	3.73803	0.000185465	0.00162067	1	DKO-WT
Tmem138	Late immature cDC1s	86.1542	0.782707	0.209732	3.73194	0.000190012	0.00165333	1	DKO-WT
Vkorc1	Late immature cDC1s	243.732	0.523729	0.140447	3.72901	0.000192235	0.00167031	1	DKO-WT
Cd69	Late immature cDC1s	59.6582	1.04103	0.281267	3.7012	0.000214578	0.00183763	1	DKO-WT
Lipo3	Late immature cDC1s	90.7799	0.785992	0.212443	3.69978	0.000215786	0.00184616	1	DKO-WT
Akr1e1	Late immature cDC1s	99.3536	0.727641	0.196847	3.69649	0.000218604	0.00186765	1	DKO-WT
Crls1	Late immature cDC1s	247.171	0.47366	0.128347	3.69046	0.000223853	0.00190983	1	DKO-WT
Grwd1	Late immature cDC1s	103.515	0.708455	0.193089	3.66906	0.000243446	0.00205696	1	DKO-WT
Smim26	Late immature cDC1s	399.046	0.450424	0.122944	3.66365	0.000248647	0.00209513	1	DKO-WT
Wdr77	Late immature cDC1s	260.301	0.489056	0.133514	3.66297	0.000249311	0.00209928	1	DKO-WT
Ptrh1	Late immature cDC1s	37.3015	1.18136	0.322619	3.66178	0.000250468	0.00210325	1	DKO-WT
Slc16a1	Late immature cDC1s	46.4401	1.09155	0.298091	3.66179	0.00025046	0.00210325	1	DKO-WT
Psmg2	Late immature cDC1s	241.693	0.488888	0.133501	3.66207	0.000250187	0.00210325	1	DKO-WT
Lmf1	Late immature cDC1s	142.765	0.632597	0.173051	3.65556	0.00025662	0.00214755	1	DKO-WT
Hlx	Late immature cDC1s	146.232	0.617801	0.169045	3.65465	0.000257533	0.00215372	1	DKO-WT
Comtd1	Late immature cDC1s	133.042	0.634298	0.173672	3.65228	0.000259922	0.00216813	1	DKO-WT
Acsl3	Late immature cDC1s	32.9604	1.28113	0.351608	3.64364	0.000268811	0.00223887	1	DKO-WT
Mrps27	Late immature cDC1s	221.248	0.560028	0.153799	3.6413	0.000271268	0.00225474	1	DKO-WT
Pwwp2b	Late immature cDC1s	36.8813	1.2433	0.341667	3.63892	0.000273779	0.00227181	1	DKO-WT
Gaa	Late immature cDC1s	213.586	0.52134	0.143458	3.63409	0.000278958	0.00230927	1	DKO-WT
Mesd	Late immature cDC1s	207.744	0.520699	0.143778	3.62154	0.000292855	0.00241615	1	DKO-WT
H1f0	Late immature cDC1s	304.517	0.496131	0.137166	3.617	0.000298036	0.0024523	1	DKO-WT
Tor2a	Late immature cDC1s	416.376	0.406309	0.112405	3.61469	0.000300708	0.00246765	1	DKO-WT
Yae1d1	Late immature cDC1s	262.647	0.464613	0.128767	3.60816	0.000308379	0.00252049	1	DKO-WT
Zdhhc18	Late immature cDC1s	164.365	0.564088	0.156551	3.60323	0.000314292	0.00256028	1	DKO-WT
Coq5	Late immature cDC1s	268.084	0.446563	0.124042	3.60011	0.000318087	0.00258775	1	DKO-WT
Psrc1	Late immature cDC1s	22.8863	1.53765	0.427294	3.59857	0.00031997	0.00260135	1	DKO-WT
Mettl5	Late immature cDC1s	226.731	0.531237	0.147798	3.59436	0.000325194	0.00263682	1	DKO-WT
Rit1	Late immature cDC1s	297.433	0.438048	0.122419	3.57827	0.000345879	0.00277557	1	DKO-WT
Zfp428	Late immature cDC1s	31.3036	1.29183	0.361017	3.57831	0.000345824	0.00277557	1	DKO-WT
Nle1	Late immature cDC1s	117.104	0.692799	0.193798	3.57486	0.000350419	0.0028061	1	DKO-WT
Mocs2	Late immature cDC1s	201.631	0.532528	0.149464	3.56291	0.000366772	0.00292557	1	DKO-WT
Nup93	Late immature cDC1s	384.842	0.401583	0.112883	3.55753	0.000374364	0.00297453	1	DKO-WT
Creb3l1	Late immature cDC1s	13.5661	2.17257	0.611283	3.55411	0.000379256	0.00300561	1	DKO-WT
Zswim7	Late immature cDC1s	201.966	0.51309	0.14436	3.55425	0.000379064	0.00300561	1	DKO-WT
Nup43	Late immature cDC1s	95.1459	0.739526	0.208231	3.55147	0.000383082	0.00303397	1	DKO-WT
Xaf1	Late immature cDC1s	120.206	0.75132	0.211819	3.54699	0.000389661	0.00308011	1	DKO-WT
Gm10275	Late immature cDC1s	171.982	0.536694	0.151895	3.53333	0.000410357	0.00321793	1	DKO-WT
Amdhd2	Late immature cDC1s	340.96	0.437409	0.123805	3.53306	0.000410772	0.00321793	1	DKO-WT
Irak1bp1	Late immature cDC1s	14.4332	2.03603	0.57742	3.52608	0.000421766	0.00329144	1	DKO-WT
Rpl18-ps2	Late immature cDC1s	115.048	0.65551	0.185914	3.52588	0.000422075	0.00329176	1	DKO-WT
Prodh	Late immature cDC1s	24.2964	1.4273	0.405285	3.52171	0.000428775	0.00332918	1	DKO-WT
Poldip2	Late immature cDC1s	261.649	0.457039	0.129871	3.51917	0.000432896	0.00335481	1	DKO-WT
Alkbh7	Late immature cDC1s	290.349	0.446049	0.126782	3.51824	0.000434419	0.00336334	1	DKO-WT
Slc20a1	Late immature cDC1s	399.51	0.444535	0.126393	3.5171	0.000436295	0.00337262	1	DKO-WT
Scnm1	Late immature cDC1s	287.146	0.42094	0.119887	3.51114	0.000446184	0.00344472	1	DKO-WT
Bysl	Late immature cDC1s	158.743	0.559995	0.159774	3.50491	0.000456756	0.00351748	1	DKO-WT
E330020D12Rik	Late immature cDC1s	293.862	0.463563	0.132459	3.49968	0.000465813	0.003576	1	DKO-WT
4930512J16Rik	Late immature cDC1s	13.0136	2.14142	0.612665	3.49526	0.000473604	0.00362899	1	DKO-WT
Igsf9	Late immature cDC1s	77.946	0.777714	0.222573	3.4942	0.000475483	0.00364111	1	DKO-WT
Gpatch4	Late immature cDC1s	231.699	0.474186	0.135842	3.49071	0.000481742	0.00368444	1	DKO-WT
Hadh	Late immature cDC1s	211.749	0.499614	0.143503	3.48157	0.000498482	0.00380061	1	DKO-WT
Stk40	Late immature cDC1s	339.903	0.404227	0.116192	3.47895	0.00050339	0.00383089	1	DKO-WT
Dhrs11	Late immature cDC1s	77.9895	0.797294	0.229331	3.4766	0.000507817	0.0038574	1	DKO-WT
Pmm1	Late immature cDC1s	150.609	0.615914	0.177177	3.47626	0.000508468	0.00385995	1	DKO-WT
Tmem222	Late immature cDC1s	339.181	0.406618	0.11701	3.47506	0.000510736	0.00387477	1	DKO-WT
Lratd2	Late immature cDC1s	87.4181	0.815497	0.23546	3.46342	0.000533365	0.00402156	1	DKO-WT
Abt1	Late immature cDC1s	292.173	0.415048	0.120514	3.44397	0.000573231	0.00429049	1	DKO-WT
Med27	Late immature cDC1s	218.642	0.48213	0.140552	3.43025	0.000603016	0.00448331	1	DKO-WT
Gtf2h4	Late immature cDC1s	170.802	0.527356	0.153961	3.42525	0.000614239	0.00455294	1	DKO-WT
Lair1	Late immature cDC1s	70.2248	0.814363	0.237997	3.42173	0.000622235	0.00460108	1	DKO-WT
Qrsl1	Late immature cDC1s	176.83	0.540425	0.158146	3.41725	0.00063258	0.00466632	1	DKO-WT
Gart	Late immature cDC1s	275.744	0.482913	0.141732	3.40723	0.000656254	0.00482066	1	DKO-WT
Celf4	Late immature cDC1s	94.7296	0.698224	0.204967	3.40652	0.000657962	0.00482742	1	DKO-WT
Srd5a3	Late immature cDC1s	172.878	0.555608	0.163201	3.40445	0.000662969	0.00486124	1	DKO-WT
Isg20	Late immature cDC1s	126.699	0.631048	0.185388	3.40394	0.000664212	0.00486745	1	DKO-WT
Gm12981	Late immature cDC1s	38.3772	1.08552	0.319695	3.39549	0.000685048	0.00500518	1	DKO-WT
Grk6	Late immature cDC1s	255.417	0.460857	0.136209	3.38346	0.000715787	0.00519263	1	DKO-WT
Dohh	Late immature cDC1s	419.095	0.449148	0.132915	3.37921	0.000726947	0.00525239	1	DKO-WT
Tceal9	Late immature cDC1s	304.106	0.407245	0.120729	3.37321	0.00074297	0.00534244	1	DKO-WT
Desi1	Late immature cDC1s	312.341	0.405776	0.120294	3.37321	0.000742974	0.00534244	1	DKO-WT
Rfesd	Late immature cDC1s	162.658	0.540053	0.161481	3.34438	0.000824672	0.00586454	1	DKO-WT
Gm43360	Late immature cDC1s	91.4512	0.718031	0.214848	3.34204	0.000831648	0.00591073	1	DKO-WT
Coq3	Late immature cDC1s	108.092	0.644701	0.193291	3.33539	0.000851803	0.00603456	1	DKO-WT
Fam136a	Late immature cDC1s	274.681	0.413722	0.124056	3.33496	0.000853103	0.00603871	1	DKO-WT
BC147527	Late immature cDC1s	87.2547	0.729528	0.218952	3.3319	0.000862543	0.00609146	1	DKO-WT
Eif2b3	Late immature cDC1s	164.215	0.517998	0.155864	3.32339	0.000889317	0.00625174	1	DKO-WT
Mrps10	Late immature cDC1s	358.381	0.41349	0.124808	3.31301	0.000922983	0.00644406	1	DKO-WT
Ctps	Late immature cDC1s	119.774	0.604703	0.18256	3.31236	0.000925125	0.00645166	1	DKO-WT
Zcchc3	Late immature cDC1s	43.5947	0.986582	0.298026	3.31039	0.000931645	0.00649344	1	DKO-WT
Bambi	Late immature cDC1s	123.129	0.671521	0.202925	3.3092	0.000935616	0.00651372	1	DKO-WT
Snx16	Late immature cDC1s	62.7998	0.822199	0.248704	3.30593	0.000946625	0.00658662	1	DKO-WT
Lgals3	Late immature cDC1s	22202.8	0.457706	0.138478	3.30525	0.000948901	0.00659871	1	DKO-WT
B4galt5	Late immature cDC1s	180.098	0.500055	0.151395	3.30299	0.000956598	0.00663362	1	DKO-WT
Pcgf5	Late immature cDC1s	302.458	0.401625	0.121711	3.29982	0.000967471	0.0066899	1	DKO-WT
Dpp7	Late immature cDC1s	205.607	0.511149	0.155016	3.29739	0.000975878	0.00673663	1	DKO-WT
Eif2b4	Late immature cDC1s	238.735	0.427125	0.129632	3.29491	0.000984546	0.00676979	1	DKO-WT
Pabpc4	Late immature cDC1s	180.582	0.510483	0.155084	3.29166	0.000995995	0.00684084	1	DKO-WT
Pter	Late immature cDC1s	57.5996	1.01165	0.307649	3.28834	0.00100778	0.00691019	1	DKO-WT
Zfp296	Late immature cDC1s	67.2142	0.776956	0.236381	3.28689	0.00101302	0.00693871	1	DKO-WT
Trp53rka	Late immature cDC1s	138.648	0.553447	0.16901	3.27463	0.001058	0.00719818	1	DKO-WT
Slamf9	Late immature cDC1s	111.448	0.709159	0.216953	3.26873	0.00108032	0.00731372	1	DKO-WT
Ddx56	Late immature cDC1s	220.701	0.453862	0.13885	3.26872	0.00108035	0.00731372	1	DKO-WT
Il13ra1	Late immature cDC1s	262.261	0.47023	0.143963	3.26631	0.00108958	0.00736801	1	DKO-WT
Mrps6	Late immature cDC1s	320.924	0.452481	0.138718	3.26188	0.00110675	0.00747175	1	DKO-WT
Rab39	Late immature cDC1s	239.506	0.471627	0.144715	3.25901	0.001118	0.00753117	1	DKO-WT
Mzt2	Late immature cDC1s	148.205	0.563283	0.172871	3.25841	0.00112039	0.00754311	1	DKO-WT
Lgals9	Late immature cDC1s	129.773	0.607541	0.187104	3.24708	0.00116597	0.00781566	1	DKO-WT
Qpct	Late immature cDC1s	240.606	0.497259	0.153523	3.23899	0.00119952	0.00800989	1	DKO-WT
Atp9a	Late immature cDC1s	10.5688	2.20702	0.681702	3.23752	0.00120575	0.00804706	1	DKO-WT
Mapk11	Late immature cDC1s	14.5642	1.78824	0.553579	3.23032	0.00123651	0.00821854	1	DKO-WT
Nme4	Late immature cDC1s	229.403	0.47051	0.145711	3.22907	0.00124193	0.00824816	1	DKO-WT
Fopnl	Late immature cDC1s	211.628	0.487033	0.151536	3.21398	0.00130907	0.00864352	1	DKO-WT
Zfp617	Late immature cDC1s	62.4473	0.80414	0.250297	3.21274	0.00131474	0.00867065	1	DKO-WT
Cox10	Late immature cDC1s	127.07	0.563359	0.175403	3.2118	0.00131908	0.00868993	1	DKO-WT
Msmo1	Late immature cDC1s	240.226	0.420328	0.131205	3.20359	0.00135725	0.00892222	1	DKO-WT
Cox18	Late immature cDC1s	188.833	0.466237	0.146054	3.19223	0.00141179	0.00921649	1	DKO-WT
Acot2	Late immature cDC1s	137.575	0.565261	0.177341	3.18742	0.00143548	0.00935124	1	DKO-WT
Glipr2	Late immature cDC1s	35.2555	1.05144	0.330172	3.18453	0.0014499	0.0094351	1	DKO-WT
Tfap4	Late immature cDC1s	57.5865	0.829468	0.2606	3.18292	0.00145798	0.00947761	1	DKO-WT
Mrpl47	Late immature cDC1s	119.281	0.598178	0.187957	3.18252	0.00146001	0.00948578	1	DKO-WT
Tnfrsf13b	Late immature cDC1s	47.9519	0.93856	0.295343	3.17786	0.00148366	0.00962414	1	DKO-WT
Pvt1	Late immature cDC1s	37.0708	1.05867	0.333415	3.17524	0.00149715	0.00969626	1	DKO-WT
Dbr1	Late immature cDC1s	208.481	0.465945	0.146885	3.17216	0.00151307	0.0097839	1	DKO-WT
Gm6472	Late immature cDC1s	207.846	0.4492	0.141644	3.17134	0.00151737	0.00980421	1	DKO-WT
Ecsit	Late immature cDC1s	170.073	0.50869	0.160499	3.16942	0.00152742	0.00984736	1	DKO-WT
Slc37a2	Late immature cDC1s	50.9235	0.879731	0.277664	3.16833	0.00153317	0.00987737	1	DKO-WT
Abhd11	Late immature cDC1s	160.957	0.507172	0.160297	3.16394	0.00155646	0.0100012	1	DKO-WT
Dmap1	Late immature cDC1s	133.139	0.551093	0.174319	3.16141	0.00157006	0.010078	1	DKO-WT
Gstp3	Late immature cDC1s	73.0229	0.73737	0.234162	3.14897	0.00163849	0.0104625	1	DKO-WT
Cldn12	Late immature cDC1s	10.9122	2.09337	0.665413	3.14597	0.00165535	0.0105591	1	DKO-WT
Hspa4l	Late immature cDC1s	246.19	0.541386	0.17222	3.14357	0.00166899	0.0106185	1	DKO-WT
Zc2hc1a	Late immature cDC1s	57.9468	0.803082	0.25605	3.13643	0.00171016	0.0108355	1	DKO-WT
Etv5	Late immature cDC1s	24.4543	1.34913	0.430429	3.13439	0.0017221	0.0108942	1	DKO-WT
D10Wsu102e	Late immature cDC1s	249.493	0.414976	0.133077	3.11832	0.00181885	0.0113887	1	DKO-WT
Depdc7	Late immature cDC1s	111.32	0.606298	0.194619	3.11531	0.00183753	0.0114822	1	DKO-WT
Stbd1	Late immature cDC1s	240.749	0.416225	0.133736	3.11229	0.00185641	0.0115943	1	DKO-WT
Ccnq	Late immature cDC1s	150.358	0.517286	0.166635	3.1043	0.00190731	0.0118699	1	DKO-WT
Alg1	Late immature cDC1s	190.72	0.483735	0.155926	3.10233	0.00192001	0.0119255	1	DKO-WT
Praf2	Late immature cDC1s	211.66	0.431984	0.13975	3.09112	0.00199402	0.0123219	1	DKO-WT
Txndc12	Late immature cDC1s	164.113	0.520333	0.168587	3.08644	0.00202572	0.0125052	1	DKO-WT
Cmss1	Late immature cDC1s	91.4959	0.659436	0.213694	3.08588	0.00202948	0.0125095	1	DKO-WT
Tatdn1	Late immature cDC1s	219.282	0.421466	0.136618	3.085	0.00203553	0.0125405	1	DKO-WT
Serf1	Late immature cDC1s	31.717	1.09042	0.353852	3.08156	0.0020592	0.0126545	1	DKO-WT
Trmo	Late immature cDC1s	71.858	0.721057	0.234508	3.07476	0.00210669	0.0129076	1	DKO-WT
Pag1	Late immature cDC1s	95.8784	0.624145	0.203365	3.06909	0.00214709	0.0130897	1	DKO-WT
Cdpf1	Late immature cDC1s	212.61	0.430325	0.140683	3.05882	0.00222209	0.0134999	1	DKO-WT
Gcsh	Late immature cDC1s	226.315	0.465193	0.152695	3.04656	0.0023148	0.0139915	1	DKO-WT
Cgref1	Late immature cDC1s	112.234	0.642608	0.211291	3.04134	0.00235527	0.0142034	1	DKO-WT
Spire1	Late immature cDC1s	125.056	0.562443	0.185091	3.03874	0.0023757	0.0143126	1	DKO-WT
Pus7	Late immature cDC1s	74.2049	0.689885	0.227364	3.03428	0.00241114	0.0144692	1	DKO-WT
AU020206	Late immature cDC1s	98.3567	0.603042	0.198916	3.03165	0.00243223	0.0145709	1	DKO-WT
Cln5	Late immature cDC1s	242.394	0.420734	0.138837	3.03043	0.00244208	0.0146119	1	DKO-WT
Ddx19a	Late immature cDC1s	209.101	0.448353	0.148122	3.02692	0.00247057	0.0147549	1	DKO-WT
Adam15	Late immature cDC1s	59.1279	0.763139	0.25225	3.02534	0.00248358	0.0148097	1	DKO-WT
Tex264	Late immature cDC1s	212.83	0.435815	0.144119	3.024	0.00249458	0.014868	1	DKO-WT
Gemin2	Late immature cDC1s	88.9327	0.653339	0.216311	3.02037	0.00252468	0.0150255	1	DKO-WT
Gm15344	Late immature cDC1s	12.1855	1.77868	0.590162	3.01388	0.00257926	0.0152779	1	DKO-WT
Acp6	Late immature cDC1s	174.404	0.475907	0.158168	3.00888	0.00262217	0.0155153	1	DKO-WT
Rps15a-ps5	Late immature cDC1s	282.845	0.41196	0.137365	2.99903	0.00270843	0.0158891	1	DKO-WT
Mtg1	Late immature cDC1s	173.134	0.450086	0.150062	2.99933	0.00270575	0.0158891	1	DKO-WT
Them4	Late immature cDC1s	36.1727	0.989742	0.330193	2.99746	0.00272237	0.0159618	1	DKO-WT
Bcl3	Late immature cDC1s	58.9178	0.776034	0.259008	2.99618	0.00273389	0.0160064	1	DKO-WT
Zdhhc2	Late immature cDC1s	103.145	0.621311	0.207935	2.988	0.00280807	0.0163486	1	DKO-WT
Flt3l	Late immature cDC1s	60.9375	0.755141	0.252833	2.98671	0.00281993	0.0163772	1	DKO-WT
Mfsd11	Late immature cDC1s	161.918	0.484907	0.162352	2.98677	0.00281942	0.0163772	1	DKO-WT
Tyw5	Late immature cDC1s	94.5969	0.624517	0.209473	2.98137	0.00286957	0.0166419	1	DKO-WT
Gm12254	Late immature cDC1s	172.004	0.493517	0.165663	2.97903	0.0028916	0.0167617	1	DKO-WT
5430427O19Rik	Late immature cDC1s	177.933	0.455345	0.152976	2.97658	0.00291487	0.0168647	1	DKO-WT
Trmt61a	Late immature cDC1s	123.706	0.529245	0.178	2.97329	0.00294623	0.017006	1	DKO-WT
A630001G21Rik	Late immature cDC1s	227.361	0.428683	0.144238	2.97206	0.00295806	0.0170575	1	DKO-WT
Polr3d	Late immature cDC1s	163.875	0.458479	0.154266	2.97201	0.00295861	0.0170575	1	DKO-WT
Eef2k	Late immature cDC1s	103.277	0.591552	0.199434	2.96615	0.00301551	0.0173406	1	DKO-WT
Kat2a	Late immature cDC1s	169.211	0.453219	0.153088	2.96051	0.00307126	0.0176116	1	DKO-WT
Nme6	Late immature cDC1s	75.7012	0.657495	0.222571	2.95409	0.0031359	0.0179319	1	DKO-WT
Tsc22d3	Late immature cDC1s	4995.42	0.739024	0.250391	2.95147	0.0031626	0.0180594	1	DKO-WT
Gm27477	Late immature cDC1s	13.1746	1.66604	0.56497	2.94891	0.00318902	0.0181848	1	DKO-WT
Phf11c	Late immature cDC1s	151.424	0.493829	0.167969	2.94	0.00328209	0.0186289	1	DKO-WT
Nepro	Late immature cDC1s	98.6501	0.581635	0.198481	2.93044	0.00338483	0.01915	1	DKO-WT
Rpp40	Late immature cDC1s	45.407	0.841861	0.287638	2.92681	0.00342456	0.0193391	1	DKO-WT
Ccdc163	Late immature cDC1s	97.0869	0.604571	0.20665	2.92558	0.00343811	0.0193977	1	DKO-WT
Pik3r6	Late immature cDC1s	55.9257	0.810495	0.277464	2.92108	0.00348822	0.0196443	1	DKO-WT
Slc19a1	Late immature cDC1s	29.4541	1.07989	0.370357	2.91581	0.00354769	0.0199334	1	DKO-WT
Ninj1	Late immature cDC1s	194.59	0.4649	0.159456	2.91554	0.00355075	0.0199413	1	DKO-WT
Rnd3	Late immature cDC1s	350.792	0.785879	0.27006	2.91001	0.00361414	0.0202511	1	DKO-WT
Mtrr	Late immature cDC1s	55.4763	0.791614	0.272568	2.90428	0.00368105	0.0205883	1	DKO-WT
Thoc5	Late immature cDC1s	244.402	0.40233	0.138873	2.89711	0.00376614	0.0209854	1	DKO-WT
Trub1	Late immature cDC1s	115.275	0.52751	0.182088	2.897	0.00376744	0.0209854	1	DKO-WT
Nxn	Late immature cDC1s	100.445	0.592842	0.20529	2.88783	0.0038791	0.0215096	1	DKO-WT
St7	Late immature cDC1s	22.6349	1.25158	0.433638	2.88623	0.00389891	0.0215902	1	DKO-WT
Slc2a1	Late immature cDC1s	83.3345	0.64838	0.225024	2.88139	0.0039593	0.0218662	1	DKO-WT
Calhm2	Late immature cDC1s	271.139	0.420248	0.145946	2.87947	0.00398341	0.0219787	1	DKO-WT
Gm15580	Late immature cDC1s	12.2411	1.65531	0.576165	2.87298	0.00406614	0.0223547	1	DKO-WT
B930086L07Rik	Late immature cDC1s	83.7099	0.622843	0.217026	2.8699	0.00410598	0.0225333	1	DKO-WT
Nt5m	Late immature cDC1s	191.919	0.424753	0.148234	2.86542	0.00416461	0.0227836	1	DKO-WT
Hmgb3	Late immature cDC1s	61.1826	0.836271	0.292166	2.86232	0.00420557	0.0229463	1	DKO-WT
Gm8130	Late immature cDC1s	31.3753	0.995003	0.347646	2.86212	0.00420823	0.0229506	1	DKO-WT
Enoph1	Late immature cDC1s	214.972	0.40425	0.141393	2.85904	0.0042492	0.0231431	1	DKO-WT
Gm9892	Late immature cDC1s	15.0403	1.46963	0.514126	2.85851	0.00425637	0.0231616	1	DKO-WT
Rps12-ps10	Late immature cDC1s	45.1735	0.826949	0.289768	2.85383	0.00431957	0.0234359	1	DKO-WT
Epha2	Late immature cDC1s	16.1001	1.60221	0.561866	2.85159	0.00435017	0.0235883	1	DKO-WT
Gm10073	Late immature cDC1s	108.255	0.559361	0.196607	2.84508	0.00444008	0.0239661	1	DKO-WT
AW209491	Late immature cDC1s	46.3785	0.822871	0.289251	2.84484	0.00444339	0.0239665	1	DKO-WT
Mettl8	Late immature cDC1s	68.5074	0.66723	0.234927	2.84016	0.00450912	0.0242464	1	DKO-WT
Zcchc10	Late immature cDC1s	178.902	0.417543	0.147285	2.83492	0.00458365	0.0245825	1	DKO-WT
Relt	Late immature cDC1s	90.9539	0.57972	0.204719	2.83178	0.00462891	0.0247494	1	DKO-WT
Adprhl2	Late immature cDC1s	221.878	0.403012	0.142343	2.83127	0.00463631	0.0247529	1	DKO-WT
2410131K14Rik	Late immature cDC1s	78.2446	0.642295	0.227279	2.82602	0.004713	0.0250027	1	DKO-WT
Ngrn	Late immature cDC1s	168.416	0.446478	0.158038	2.82513	0.00472613	0.0250616	1	DKO-WT
Utp14b	Late immature cDC1s	42.1878	0.943666	0.334581	2.82044	0.00479577	0.0253432	1	DKO-WT
Gm47138	Late immature cDC1s	155.098	0.450759	0.159938	2.81833	0.00482744	0.0254557	1	DKO-WT
Kctd14	Late immature cDC1s	230.542	0.475978	0.169782	2.80347	0.00505559	0.0264539	1	DKO-WT
Mapk13	Late immature cDC1s	125.194	0.528109	0.188409	2.80299	0.00506305	0.0264816	1	DKO-WT
Mcrip2	Late immature cDC1s	183.832	0.471912	0.168677	2.79773	0.00514628	0.0268368	1	DKO-WT
Thop1	Late immature cDC1s	53.6227	0.740526	0.264743	2.79715	0.00515557	0.0268738	1	DKO-WT
Gm49839	Late immature cDC1s	22.7758	1.39482	0.499444	2.79276	0.00522612	0.0271723	1	DKO-WT
Acap1	Late immature cDC1s	67.8149	0.661111	0.236811	2.79172	0.00524288	0.0272363	1	DKO-WT
Noc4l	Late immature cDC1s	191.727	0.416373	0.149352	2.78787	0.00530566	0.0275283	1	DKO-WT
Zscan22	Late immature cDC1s	39.4068	0.87126	0.313453	2.77956	0.00544331	0.0281463	1	DKO-WT
Ptgs2	Late immature cDC1s	112.461	0.636072	0.229254	2.77452	0.00552829	0.0284418	1	DKO-WT
Phlda1	Late immature cDC1s	127.747	0.502756	0.181196	2.77466	0.005526	0.0284418	1	DKO-WT
Epop	Late immature cDC1s	69.2233	0.648582	0.233755	2.77463	0.00552651	0.0284418	1	DKO-WT
Pgpep1	Late immature cDC1s	106.689	0.557097	0.200897	2.77305	0.00555341	0.0284993	1	DKO-WT
Itfg2	Late immature cDC1s	183.18	0.428932	0.155117	2.76523	0.00568833	0.0291064	1	DKO-WT
Nol10	Late immature cDC1s	148.735	0.459388	0.166349	2.76159	0.00575204	0.0293956	1	DKO-WT
Tfpt	Late immature cDC1s	159.869	0.442748	0.160495	2.75864	0.00580424	0.02965	1	DKO-WT
Rpsa-ps1	Late immature cDC1s	24.6557	1.09425	0.397147	2.75527	0.00586434	0.0298841	1	DKO-WT
Spns3	Late immature cDC1s	106.401	0.547597	0.198773	2.75488	0.00587129	0.0299053	1	DKO-WT
Ifi203	Late immature cDC1s	154.103	0.521768	0.189473	2.75378	0.00589109	0.0299619	1	DKO-WT
Bcdin3d	Late immature cDC1s	21.5856	1.17914	0.428417	2.75232	0.00591752	0.0300534	1	DKO-WT
Ptpn12	Late immature cDC1s	144.71	0.456282	0.16584	2.75134	0.00593512	0.0301178	1	DKO-WT
Gm3571	Late immature cDC1s	44.7547	0.803982	0.292346	2.7501	0.00595762	0.0301945	1	DKO-WT
Rhebl1	Late immature cDC1s	50.4244	0.741181	0.269878	2.74635	0.00602615	0.0304914	1	DKO-WT
Usp36	Late immature cDC1s	208.095	0.414499	0.151123	2.74279	0.0060919	0.0307733	1	DKO-WT
Gm16378	Late immature cDC1s	19.8131	1.26482	0.462527	2.73458	0.00624601	0.0313194	1	DKO-WT
Paox	Late immature cDC1s	54.0103	0.7491	0.274022	2.73373	0.00626222	0.0313879	1	DKO-WT
Cdc23	Late immature cDC1s	113.685	0.507757	0.186403	2.72397	0.00645018	0.0322509	1	DKO-WT
Det1	Late immature cDC1s	89.545	0.56222	0.206665	2.72044	0.00651955	0.0325447	1	DKO-WT
Fkbp5	Late immature cDC1s	131.692	1.07188	0.394537	2.71681	0.00659153	0.0328638	1	DKO-WT
Coq6	Late immature cDC1s	88.3061	0.570512	0.210082	2.71567	0.00661427	0.0329638	1	DKO-WT
Rps15a-ps4	Late immature cDC1s	65.2679	0.671862	0.247596	2.71354	0.00665687	0.0331626	1	DKO-WT
Dusp4	Late immature cDC1s	77.2283	0.658022	0.242573	2.71268	0.00667419	0.0331815	1	DKO-WT
Mtbp	Late immature cDC1s	38.7805	0.880144	0.324682	2.71078	0.00671242	0.033304	1	DKO-WT
Nkiras2	Late immature cDC1s	159.515	0.467125	0.172598	2.70643	0.00680107	0.0336556	1	DKO-WT
Dand5	Late immature cDC1s	47.5247	0.786533	0.291262	2.70043	0.00692489	0.0341526	1	DKO-WT
Rps4l	Late immature cDC1s	389.906	0.669789	0.248712	2.69303	0.00708062	0.0347373	1	DKO-WT
Myc	Late immature cDC1s	84.6659	0.602615	0.223832	2.69226	0.00709693	0.0348033	1	DKO-WT
Zfp866	Late immature cDC1s	73.7276	0.661855	0.245923	2.69131	0.00711726	0.0348751	1	DKO-WT
Nbn	Late immature cDC1s	184.549	0.402902	0.149715	2.69113	0.00712101	0.0348796	1	DKO-WT
Pwp2	Late immature cDC1s	82.6747	0.605883	0.225272	2.68956	0.00715463	0.0349605	1	DKO-WT
Apoo	Late immature cDC1s	127.308	0.468151	0.174381	2.68465	0.00726064	0.0353797	1	DKO-WT
Rpl6l	Late immature cDC1s	149.42	0.4771	0.17795	2.68109	0.0073383	0.035659	1	DKO-WT
D730003I15Rik	Late immature cDC1s	178.301	0.408888	0.152649	2.67861	0.00739283	0.0358387	1	DKO-WT
Mrm3	Late immature cDC1s	52.4565	0.716702	0.267641	2.67785	0.00740964	0.035906	1	DKO-WT
Def6	Late immature cDC1s	154.737	0.440734	0.164699	2.67599	0.00745088	0.0360773	1	DKO-WT
Zdhhc16	Late immature cDC1s	176.846	0.405809	0.151781	2.67364	0.00750325	0.0363022	1	DKO-WT
Tusc1	Late immature cDC1s	167.264	0.41836	0.156727	2.66935	0.00759973	0.0367255	1	DKO-WT
Paqr7	Late immature cDC1s	27.7441	0.991488	0.371567	2.6684	0.00762138	0.0368011	1	DKO-WT
Pusl1	Late immature cDC1s	100.074	0.576852	0.216331	2.66652	0.00766403	0.0369344	1	DKO-WT
AU022252	Late immature cDC1s	105.69	0.533909	0.200438	2.66371	0.0077284	0.0372153	1	DKO-WT
Hspe1-rs1	Late immature cDC1s	129.638	0.490033	0.184394	2.65753	0.00787156	0.0377297	1	DKO-WT
St8sia6	Late immature cDC1s	20.8277	1.23181	0.464793	2.65023	0.00804374	0.0383783	1	DKO-WT
Rpl14-ps1	Late immature cDC1s	157.401	0.422958	0.159669	2.64897	0.00807371	0.0384903	1	DKO-WT
Cpt1c	Late immature cDC1s	13.9106	1.40278	0.529748	2.64801	0.00809677	0.03858	1	DKO-WT
Pigl	Late immature cDC1s	30.1134	0.947467	0.358055	2.64615	0.00814137	0.0387474	1	DKO-WT
Coq4	Late immature cDC1s	87.4401	0.553751	0.210171	2.63477	0.00841948	0.039716	1	DKO-WT
Synj2	Late immature cDC1s	127.009	0.468077	0.177662	2.63464	0.00842265	0.039716	1	DKO-WT
Top1mt	Late immature cDC1s	50.5078	0.722269	0.274357	2.63259	0.00847364	0.0399	1	DKO-WT
Hacd1	Late immature cDC1s	9.89417	1.73983	0.663053	2.62397	0.00869114	0.0407159	1	DKO-WT
Serpine2	Late immature cDC1s	33.8509	0.915323	0.349748	2.61709	0.0088682	0.0413557	1	DKO-WT
Wdr4	Late immature cDC1s	101.251	0.527419	0.201524	2.61715	0.00886678	0.0413557	1	DKO-WT
Crbn	Late immature cDC1s	180.272	0.419991	0.160548	2.61599	0.00889697	0.0414583	1	DKO-WT
Smim13	Late immature cDC1s	97.9955	0.54066	0.207191	2.60947	0.00906828	0.0421125	1	DKO-WT
9330159M07Rik	Late immature cDC1s	23.7313	1.0716	0.41141	2.6047	0.00919544	0.0426223	1	DKO-WT
Lactb2	Late immature cDC1s	75.1132	0.614457	0.236815	2.59467	0.00946813	0.043606	1	DKO-WT
Zfp358	Late immature cDC1s	77.9121	0.596212	0.230037	2.5918	0.0095474	0.0438887	1	DKO-WT
Sertad1	Late immature cDC1s	124.851	0.497028	0.19182	2.59112	0.00956652	0.0439601	1	DKO-WT
Gm22146	Late immature cDC1s	9.26994	1.78919	0.691873	2.586	0.00970961	0.0444551	1	DKO-WT
Ltb	Late immature cDC1s	600.963	0.917791	0.355117	2.58447	0.00975281	0.0445822	1	DKO-WT
Camkk2	Late immature cDC1s	110.4	0.497707	0.192701	2.58279	0.00980041	0.0447831	1	DKO-WT
Spa17	Late immature cDC1s	25.3653	1.01829	0.394373	2.58206	0.00982127	0.044845	1	DKO-WT
Gm50340	Late immature cDC1s	28.6579	0.941099	0.3645	2.58189	0.00982615	0.0448506	1	DKO-WT
Tdp1	Late immature cDC1s	72.2048	0.590693	0.228854	2.58109	0.00984879	0.0449248	1	DKO-WT
Rhbdd3	Late immature cDC1s	91.7605	0.523245	0.202834	2.57967	0.00988951	0.0450559	1	DKO-WT
Pcgf6	Late immature cDC1s	103.693	0.506663	0.196398	2.57978	0.00988619	0.0450559	1	DKO-WT
Zmat3	Late immature cDC1s	96.3753	0.529418	0.20544	2.577	0.00996619	0.0453884	1	DKO-WT
Trim62	Late immature cDC1s	40.7577	0.819103	0.317874	2.57682	0.00997145	0.0453955	1	DKO-WT
AI504432	Late immature cDC1s	83.6637	0.577887	0.224611	2.57283	0.010087	0.0457853	1	DKO-WT
Sgsm3	Late immature cDC1s	171.366	0.451014	0.175722	2.56664	0.0102689	0.0464907	1	DKO-WT
Zfp1	Late immature cDC1s	119.528	0.463029	0.180415	2.56646	0.0102741	0.0464973	1	DKO-WT
Metap1d	Late immature cDC1s	114.399	0.473096	0.18443	2.56518	0.0103123	0.046584	1	DKO-WT
Ntmt1	Late immature cDC1s	168.18	0.44209	0.173072	2.55438	0.0106378	0.0477729	1	DKO-WT
Dtx4	Late immature cDC1s	92.015	0.543928	0.213314	2.5499	0.0107755	0.0483026	1	DKO-WT
Spryd4	Late immature cDC1s	70.7317	0.590136	0.232075	2.54287	0.0109947	0.0490877	1	DKO-WT
Letmd1	Late immature cDC1s	176.539	0.409418	0.161198	2.53984	0.0110903	0.0493741	1	DKO-WT
Lyrm4	Late immature cDC1s	102.522	0.512289	0.201977	2.53637	0.0112007	0.049682	1	DKO-WT
Spryd7	Late immature cDC1s	160.801	0.424034	0.167193	2.53619	0.0112065	0.0496897	1	DKO-WT

## Sheet: Cxcl9+ cDC1s_DOWN
gene	cluster_id	baseMean	logFC	lfcSE	stat	p_val	p_adj.loc	p_adj.glb	contrast
Apol7c	Cxcl9+ cDC1s	1924.97	-1.22882	0.102195	-12.0243	2.64954e-33	1.23204e-30	3.24842e-28	DKO-WT
Sec61b	Cxcl9+ cDC1s	1025.58	-0.909095	0.0793748	-11.4532	2.26636e-30	9.72791e-28	2.77815e-25	DKO-WT
Crip1	Cxcl9+ cDC1s	1301.32	-0.897188	0.0933621	-9.60977	7.27147e-22	1.93213e-19	8.90602e-17	DKO-WT
Il1b	Cxcl9+ cDC1s	1882.9	-0.67228	0.0756811	-8.88306	6.50449e-19	1.34426e-16	7.96202e-14	DKO-WT
mt-Rnr2	Cxcl9+ cDC1s	6129.36	-0.610033	0.0753	-8.10137	5.43439e-16	8.91879e-14	6.64713e-11	DKO-WT
Ckb	Cxcl9+ cDC1s	669.364	-0.719695	0.0919898	-7.82363	5.13215e-15	7.95483e-13	6.27462e-10	DKO-WT
S100a11	Cxcl9+ cDC1s	1276.75	-0.549356	0.0764075	-7.18981	6.48825e-13	7.70307e-11	7.92306e-08	DKO-WT
Ost4	Cxcl9+ cDC1s	397.64	-0.776035	0.10874	-7.1366	9.56682e-13	1.08945e-10	1.16819e-07	DKO-WT
Cd52	Cxcl9+ cDC1s	6966.4	-0.403973	0.0635502	-6.35675	2.06062e-10	1.94886e-08	2.5113e-05	DKO-WT
Gusb	Cxcl9+ cDC1s	555.839	-0.674832	0.108638	-6.21176	5.23954e-10	4.79289e-08	6.38238e-05	DKO-WT
Serf2	Cxcl9+ cDC1s	963.46	-0.453772	0.0814629	-5.5703	2.54308e-08	1.84291e-06	0.00309056	DKO-WT
Man2b1	Cxcl9+ cDC1s	785.504	-0.47778	0.0925705	-5.16126	2.45297e-07	1.52084e-05	0.0297515	DKO-WT
Myl12b	Cxcl9+ cDC1s	477.888	-0.519954	0.102576	-5.06898	3.99953e-07	2.37419e-05	0.0484856	DKO-WT
Snd1	Cxcl9+ cDC1s	75.0572	-1.18872	0.235318	-5.05154	4.38262e-07	2.5474e-05	0.0531227	DKO-WT
Cd207	Cxcl9+ cDC1s	46.4212	-1.78735	0.355219	-5.03169	4.86166e-07	2.76817e-05	0.0589224	DKO-WT
Dbi	Cxcl9+ cDC1s	313.054	-0.594353	0.120291	-4.94094	7.77462e-07	4.28854e-05	0.0941856	DKO-WT
Gm43305	Cxcl9+ cDC1s	100.527	-0.998702	0.204366	-4.88682	1.02479e-06	5.55179e-05	0.124115	DKO-WT
Tmem258	Cxcl9+ cDC1s	318.465	-0.575821	0.118557	-4.85691	1.19235e-06	6.33647e-05	0.144369	DKO-WT
Cyb5a	Cxcl9+ cDC1s	811.985	-0.438259	0.0907663	-4.82844	1.37608e-06	7.1449e-05	0.16658	DKO-WT
Rpl36al	Cxcl9+ cDC1s	557.663	-0.451552	0.0962038	-4.6937	2.6831e-06	0.000132493	0.324511	DKO-WT
Ndufa4	Cxcl9+ cDC1s	706.257	-0.436988	0.0935874	-4.66931	3.02217e-06	0.000147927	0.36545	DKO-WT
Uqcrh	Cxcl9+ cDC1s	1028.54	-0.414874	0.0896299	-4.62874	3.67891e-06	0.0001761	0.444729	DKO-WT
Scp2	Cxcl9+ cDC1s	252.558	-0.572743	0.127966	-4.47575	7.61431e-06	0.000351139	0.919291	DKO-WT
Itgae	Cxcl9+ cDC1s	40.9795	-1.524	0.344224	-4.42736	9.53934e-06	0.000425836	1	DKO-WT
Cope	Cxcl9+ cDC1s	253.763	-0.555315	0.128897	-4.30821	1.64584e-05	0.000690509	1	DKO-WT
BC028528	Cxcl9+ cDC1s	343.634	-0.501076	0.119444	-4.19508	2.72774e-05	0.00107949	1	DKO-WT
Gm34084	Cxcl9+ cDC1s	196.742	-0.695327	0.166016	-4.18832	2.81023e-05	0.0011043	1	DKO-WT
Adam23	Cxcl9+ cDC1s	258.453	-0.543385	0.130783	-4.15486	3.2549e-05	0.00125258	1	DKO-WT
Cks1b	Cxcl9+ cDC1s	98.6867	-0.800758	0.194453	-4.11801	3.82162e-05	0.00145066	1	DKO-WT
Pianp	Cxcl9+ cDC1s	82.4016	-0.881997	0.217687	-4.05167	5.08537e-05	0.00187923	1	DKO-WT
Lars2	Cxcl9+ cDC1s	126.76	-0.882061	0.219665	-4.01549	5.93219e-05	0.0021635	1	DKO-WT
Abcg3	Cxcl9+ cDC1s	138.223	-0.677745	0.171189	-3.95904	7.52517e-05	0.00267455	1	DKO-WT
Etv3	Cxcl9+ cDC1s	438.358	-0.424074	0.107343	-3.95065	7.79385e-05	0.00272903	1	DKO-WT
H2-Q7	Cxcl9+ cDC1s	389.425	-0.494713	0.125254	-3.94969	7.82518e-05	0.00272903	1	DKO-WT
Igkc	Cxcl9+ cDC1s	59.0457	-1.05602	0.272374	-3.87711	0.000105706	0.00355324	1	DKO-WT
Serp1	Cxcl9+ cDC1s	376.645	-0.444167	0.115022	-3.86159	0.000112651	0.00374163	1	DKO-WT
Trappc1	Cxcl9+ cDC1s	106.763	-0.732906	0.190954	-3.83812	0.000123978	0.00399884	1	DKO-WT
Tlr12	Cxcl9+ cDC1s	49.0029	-1.04532	0.272878	-3.83073	0.000127763	0.00409722	1	DKO-WT
Rtl8a	Cxcl9+ cDC1s	106.207	-0.768545	0.202375	-3.79763	0.000146087	0.00457958	1	DKO-WT
Traf1	Cxcl9+ cDC1s	479.826	-0.450053	0.119282	-3.77302	0.000161284	0.00502772	1	DKO-WT
Anxa6	Cxcl9+ cDC1s	462.206	-0.415994	0.11089	-3.75141	0.000175843	0.00533263	1	DKO-WT
Gsn	Cxcl9+ cDC1s	241.399	-0.498968	0.133362	-3.74144	0.000182967	0.00548901	1	DKO-WT
Mefv	Cxcl9+ cDC1s	44.9376	-1.16475	0.311952	-3.73373	0.000188662	0.00559966	1	DKO-WT
Specc1	Cxcl9+ cDC1s	87.9474	-0.793459	0.213224	-3.72125	0.000198242	0.00585286	1	DKO-WT
Ssr2	Cxcl9+ cDC1s	205.885	-0.534303	0.144177	-3.70589	0.000210653	0.00618656	1	DKO-WT
Tram1	Cxcl9+ cDC1s	139.149	-0.657361	0.177956	-3.69395	0.000220801	0.00643242	1	DKO-WT
Ostc	Cxcl9+ cDC1s	262.808	-0.455794	0.1265	-3.60311	0.000314427	0.00899746	1	DKO-WT
Cd48	Cxcl9+ cDC1s	249.436	-0.51432	0.143902	-3.5741	0.000351441	0.00970813	1	DKO-WT
Dnajb9	Cxcl9+ cDC1s	57.9299	-0.897942	0.251739	-3.56696	0.000361152	0.00988538	1	DKO-WT
Nucb1	Cxcl9+ cDC1s	100.528	-0.673994	0.190199	-3.54362	0.000394668	0.0106389	1	DKO-WT
Cdk5rap3	Cxcl9+ cDC1s	70.1878	-0.869398	0.248399	-3.5	0.000465256	0.0121314	1	DKO-WT
Zbtb8os	Cxcl9+ cDC1s	93.8258	-0.769606	0.220083	-3.49689	0.000470716	0.0122167	1	DKO-WT
Copa	Cxcl9+ cDC1s	168.041	-0.534342	0.153015	-3.49209	0.000479262	0.0123239	1	DKO-WT
Tmed2	Cxcl9+ cDC1s	287.418	-0.428299	0.123885	-3.45723	0.000545755	0.0137176	1	DKO-WT
Ndufa1	Cxcl9+ cDC1s	232.03	-0.479636	0.138914	-3.45276	0.000554876	0.0138843	1	DKO-WT
Lig1	Cxcl9+ cDC1s	43.4815	-1.01189	0.294208	-3.43937	0.000583074	0.0143962	1	DKO-WT
Trf	Cxcl9+ cDC1s	66.6403	-0.871762	0.255378	-3.41361	0.000641072	0.0157585	1	DKO-WT
Cenpv	Cxcl9+ cDC1s	114.808	-0.631906	0.185463	-3.40719	0.000656358	0.0160635	1	DKO-WT
Vwf	Cxcl9+ cDC1s	52.304	-0.930306	0.274808	-3.3853	0.000711003	0.0169547	1	DKO-WT
Ttc39a	Cxcl9+ cDC1s	73.2567	-0.754807	0.230657	-3.27243	0.00106628	0.0243165	1	DKO-WT
Mgat2	Cxcl9+ cDC1s	121.256	-0.582498	0.178022	-3.27206	0.00106766	0.0243165	1	DKO-WT
Ufc1	Cxcl9+ cDC1s	224.265	-0.439718	0.135318	-3.24951	0.00115604	0.0258028	1	DKO-WT
Cd68	Cxcl9+ cDC1s	188.397	-0.482067	0.148792	-3.23987	0.00119584	0.0263747	1	DKO-WT
S100a13	Cxcl9+ cDC1s	179.68	-0.477881	0.149989	-3.1861	0.00144207	0.0308304	1	DKO-WT
Anxa1	Cxcl9+ cDC1s	245.373	-0.423763	0.133677	-3.17005	0.00152412	0.0320927	1	DKO-WT
Tor1a	Cxcl9+ cDC1s	170.942	-0.492367	0.155735	-3.16157	0.0015692	0.0327946	1	DKO-WT
Bet1	Cxcl9+ cDC1s	42.6096	-0.944298	0.300271	-3.14482	0.00166191	0.0346025	1	DKO-WT
Il10ra	Cxcl9+ cDC1s	312.977	-0.497413	0.158664	-3.13501	0.00171849	0.0356474	1	DKO-WT
Tmem131	Cxcl9+ cDC1s	254.464	-0.43972	0.141539	-3.10672	0.00189178	0.0383859	1	DKO-WT
Arsb	Cxcl9+ cDC1s	189.213	-0.468736	0.150878	-3.10673	0.00189171	0.0383859	1	DKO-WT
Gm8221	Cxcl9+ cDC1s	33.7263	-1.01422	0.328438	-3.08801	0.00201503	0.0405915	1	DKO-WT
Rnf145	Cxcl9+ cDC1s	43.5348	-0.872946	0.283822	-3.07568	0.0021002	0.0420039	1	DKO-WT
Gpr4	Cxcl9+ cDC1s	77.7483	-0.661542	0.215184	-3.07431	0.00210989	0.0420061	1	DKO-WT
Tmem256	Cxcl9+ cDC1s	204.056	-0.428231	0.139893	-3.06112	0.00220509	0.0434785	1	DKO-WT
Bcl11a	Cxcl9+ cDC1s	123.584	-0.536954	0.175761	-3.05502	0.00225044	0.0442164	1	DKO-WT
Treml4	Cxcl9+ cDC1s	146.325	-0.496961	0.16273	-3.05391	0.00225883	0.0442256	1	DKO-WT
Lgals1	Cxcl9+ cDC1s	139.57	-0.509242	0.166876	-3.05163	0.00227604	0.0442684	1	DKO-WT
Tuba1a	Cxcl9+ cDC1s	99.615	-0.635829	0.209734	-3.03159	0.00243266	0.0468077	1	DKO-WT
Dut	Cxcl9+ cDC1s	123.651	-0.593432	0.196521	-3.0197	0.00253028	0.0481549	1	DKO-WT

## Sheet: Cxcl9+ cDC1s_UP
gene	cluster_id	baseMean	logFC	lfcSE	stat	p_val	p_adj.loc	p_adj.glb	contrast
Hspa5	Cxcl9+ cDC1s	3630.9	1.4531	0.0799431	18.1767	7.89881e-74	4.40753e-70	9.69144e-69	DKO-WT
Mthfd2	Cxcl9+ cDC1s	542.743	1.56924	0.104805	14.973	1.10225e-50	3.07528e-47	1.35209e-45	DKO-WT
Hsp90b1	Cxcl9+ cDC1s	1953.62	1.50502	0.105349	14.2861	2.67e-46	4.9662e-43	3.27486e-41	DKO-WT
Phgdh	Cxcl9+ cDC1s	152.585	3.49008	0.247905	14.0783	5.16459e-45	7.2046e-42	6.33437e-40	DKO-WT
Ddit3	Cxcl9+ cDC1s	173.848	2.90118	0.20941	13.8541	1.20179e-43	1.3412e-40	1.47395e-38	DKO-WT
Eif4ebp1	Cxcl9+ cDC1s	268.903	2.31887	0.169263	13.6998	1.01844e-42	9.47145e-40	1.24903e-37	DKO-WT
Calr	Cxcl9+ cDC1s	2462.73	1.01834	0.0767422	13.2696	3.47556e-40	2.77052e-37	4.26229e-35	DKO-WT
Atf5	Cxcl9+ cDC1s	111.914	4.05592	0.321029	12.6341	1.36915e-36	9.54984e-34	1.67884e-31	DKO-WT
Sars	Cxcl9+ cDC1s	272.884	1.79625	0.142396	12.6145	1.75655e-36	1.08906e-33	2.15384e-31	DKO-WT
Manf	Cxcl9+ cDC1s	881.876	1.10286	0.0905042	12.1857	3.70542e-34	2.06762e-31	4.54318e-29	DKO-WT
Eif2s2	Cxcl9+ cDC1s	898.352	1.1117	0.0918726	12.1005	1.05003e-33	5.32654e-31	1.28739e-28	DKO-WT
Ifitm6	Cxcl9+ cDC1s	105.576	2.86228	0.260491	10.988	4.36398e-28	1.73936e-25	5.34866e-23	DKO-WT
Herpud1	Cxcl9+ cDC1s	1310.87	0.94327	0.0865934	10.8931	1.24346e-27	4.62568e-25	1.52398e-22	DKO-WT
2410006H16Rik	Cxcl9+ cDC1s	701.121	1.03407	0.0973873	10.6181	2.45552e-26	8.56364e-24	3.00927e-21	DKO-WT
Cebpb	Cxcl9+ cDC1s	162.644	1.95238	0.185198	10.5422	5.52133e-26	1.8123e-23	6.76612e-21	DKO-WT
Asns	Cxcl9+ cDC1s	75.4132	4.62542	0.445873	10.3738	3.26153e-25	1.01107e-22	3.99651e-20	DKO-WT
Cox6a2	Cxcl9+ cDC1s	129.772	6.82939	0.662891	10.3024	6.86991e-25	2.01759e-22	8.41784e-20	DKO-WT
Gas5	Cxcl9+ cDC1s	1411.55	0.800426	0.0822535	9.73121	2.21941e-22	6.19215e-20	2.71855e-17	DKO-WT
Ghitm	Cxcl9+ cDC1s	341.845	1.16672	0.122284	9.54112	1.41304e-21	3.58398e-19	1.73056e-16	DKO-WT
Arpc5l	Cxcl9+ cDC1s	486.291	1.06226	0.111662	9.51319	1.84898e-21	4.48578e-19	2.26439e-16	DKO-WT
Ifitm3	Cxcl9+ cDC1s	1683.45	0.966106	0.105915	9.12154	7.40643e-20	1.72199e-17	9.06783e-15	DKO-WT
Pdia3	Cxcl9+ cDC1s	1208.23	0.7096	0.0782491	9.06848	1.20688e-19	2.69376e-17	1.47755e-14	DKO-WT
Eif1	Cxcl9+ cDC1s	3636.22	0.601015	0.0663927	9.05243	1.39827e-19	3.0009e-17	1.71179e-14	DKO-WT
Nars	Cxcl9+ cDC1s	402.416	1.08046	0.123785	8.72849	2.58105e-18	5.14366e-16	3.15897e-13	DKO-WT
Psat1	Cxcl9+ cDC1s	70.5196	2.5137	0.289511	8.68259	3.86863e-18	7.44378e-16	4.73463e-13	DKO-WT
Pdia6	Cxcl9+ cDC1s	647.437	0.823268	0.0976643	8.42957	3.46932e-17	6.45293e-15	4.24516e-12	DKO-WT
Eif3c	Cxcl9+ cDC1s	621.236	0.797894	0.0972146	8.20755	2.25741e-16	4.06334e-14	2.7616e-11	DKO-WT
Slc7a1	Cxcl9+ cDC1s	89.4636	1.90666	0.232464	8.20196	2.36496e-16	4.1239e-14	2.8931e-11	DKO-WT
Sqstm1	Cxcl9+ cDC1s	369.935	1.19862	0.147515	8.12538	4.45977e-16	7.54107e-14	5.45515e-11	DKO-WT
Atf4	Cxcl9+ cDC1s	416.446	0.962276	0.121945	7.89109	2.99565e-15	4.77593e-13	3.66297e-10	DKO-WT
Gbp8	Cxcl9+ cDC1s	77.9252	1.96594	0.252353	7.79041	6.67896e-15	1.00726e-12	8.16523e-10	DKO-WT
Nupr1	Cxcl9+ cDC1s	40.0704	4.40405	0.57268	7.69024	1.46854e-14	2.15643e-12	1.79508e-09	DKO-WT
Gars	Cxcl9+ cDC1s	159.383	1.35779	0.176781	7.68065	1.58278e-14	2.26459e-12	1.93469e-09	DKO-WT
Aars	Cxcl9+ cDC1s	133.713	1.39798	0.185241	7.54681	4.46048e-14	6.22238e-12	5.45089e-09	DKO-WT
Snhg12	Cxcl9+ cDC1s	130.849	1.36451	0.183093	7.45253	9.15647e-14	1.24617e-11	1.11884e-08	DKO-WT
Ccnd2	Cxcl9+ cDC1s	89.7104	1.90916	0.258102	7.39691	1.39392e-13	1.85192e-11	1.70302e-08	DKO-WT
Lars	Cxcl9+ cDC1s	203.909	1.10511	0.150204	7.35738	1.8756e-13	2.43392e-11	2.29126e-08	DKO-WT
Chac1	Cxcl9+ cDC1s	51.4937	2.54997	0.346921	7.35028	1.9779e-13	2.50834e-11	2.41616e-08	DKO-WT
Shmt2	Cxcl9+ cDC1s	76.3289	2.13519	0.291296	7.32996	2.30223e-13	2.85477e-11	2.81213e-08	DKO-WT
Cars	Cxcl9+ cDC1s	76.1945	1.78213	0.245693	7.25347	4.06241e-13	4.92788e-11	4.96134e-08	DKO-WT
Tars	Cxcl9+ cDC1s	113.742	1.49803	0.209551	7.14875	8.75715e-13	1.01802e-10	1.06934e-07	DKO-WT
Sdf2l1	Cxcl9+ cDC1s	567.124	0.686575	0.0978624	7.01572	2.28773e-12	2.55311e-10	2.79273e-07	DKO-WT
Chchd10	Cxcl9+ cDC1s	44.1142	2.56227	0.366294	6.99512	2.65029e-12	2.89972e-10	3.23512e-07	DKO-WT
Hspa9	Cxcl9+ cDC1s	223.271	1.02227	0.14632	6.9865	2.81821e-12	3.02416e-10	3.44005e-07	DKO-WT
Tsc22d3	Cxcl9+ cDC1s	440.993	0.954919	0.137425	6.94867	3.68753e-12	3.88235e-10	4.50075e-07	DKO-WT
Slc38a2	Cxcl9+ cDC1s	301.98	0.833883	0.124659	6.68933	2.242e-11	2.31673e-09	2.73467e-06	DKO-WT
AC147806.2	Cxcl9+ cDC1s	47.3824	2.15293	0.329085	6.54216	6.06371e-11	6.15191e-09	7.39355e-06	DKO-WT
Lgals3	Cxcl9+ cDC1s	2383.54	0.660705	0.101342	6.51958	7.05059e-11	7.02541e-09	8.59623e-06	DKO-WT
Yars	Cxcl9+ cDC1s	77.2196	1.60295	0.248212	6.45801	1.0609e-10	1.03856e-08	1.29324e-05	DKO-WT
Cdkn1a	Cxcl9+ cDC1s	315.625	1.10972	0.172156	6.44601	1.14835e-10	1.10479e-08	1.3998e-05	DKO-WT
Uqcrq	Cxcl9+ cDC1s	651.326	0.614778	0.0986386	6.23263	4.5866e-10	4.26554e-08	5.58767e-05	DKO-WT
Sel1l	Cxcl9+ cDC1s	153.542	1.17814	0.19229	6.12687	8.96224e-10	8.06602e-08	0.000109146	DKO-WT
Gtpbp2	Cxcl9+ cDC1s	89.3556	1.34681	0.220335	6.11256	9.80441e-10	8.68391e-08	0.000119399	DKO-WT
Pck2	Cxcl9+ cDC1s	40.355	2.21796	0.36942	6.00389	1.92651e-09	1.65383e-07	0.000234529	DKO-WT
Ubc	Cxcl9+ cDC1s	1633.23	0.428565	0.0720494	5.94821	2.71092e-09	2.29196e-07	0.000329959	DKO-WT
Dnajb11	Cxcl9+ cDC1s	263.38	0.813131	0.139969	5.80937	6.27086e-09	5.07121e-07	0.000762887	DKO-WT
Tbcb	Cxcl9+ cDC1s	422.609	0.643604	0.111067	5.79476	6.84185e-09	5.45393e-07	0.000832325	DKO-WT
Psph	Cxcl9+ cDC1s	63.6043	1.61856	0.281438	5.75103	8.87006e-09	6.97112e-07	0.0010789	DKO-WT
Hmox1	Cxcl9+ cDC1s	38.7782	2.45373	0.427591	5.73849	9.55232e-09	7.40305e-07	0.00116182	DKO-WT
Ormdl2	Cxcl9+ cDC1s	154.499	0.960627	0.167756	5.72634	1.02623e-08	7.84435e-07	0.00124807	DKO-WT
Sesn2	Cxcl9+ cDC1s	40.6869	1.93361	0.340286	5.68231	1.32885e-08	9.88667e-07	0.00161573	DKO-WT
Iars	Cxcl9+ cDC1s	122.342	1.19303	0.212741	5.60791	2.04785e-08	1.50355e-06	0.00248914	DKO-WT
Cebpg	Cxcl9+ cDC1s	104.954	1.18868	0.215116	5.52578	3.28019e-08	2.3169e-06	0.0039856	DKO-WT
Slc3a2	Cxcl9+ cDC1s	604.891	0.552036	0.0998657	5.52778	3.24311e-08	2.3169e-06	0.00394057	DKO-WT
Krtcap2	Cxcl9+ cDC1s	364.313	0.655323	0.119297	5.49319	3.9474e-08	2.75331e-06	0.00479574	DKO-WT
Xpot	Cxcl9+ cDC1s	45.4475	1.73271	0.317869	5.45101	5.00852e-08	3.45032e-06	0.00608395	DKO-WT
Tcea1	Cxcl9+ cDC1s	156.515	0.888728	0.164365	5.40703	6.40779e-08	4.30789e-06	0.00778226	DKO-WT
Eprs	Cxcl9+ cDC1s	285.149	0.691338	0.127986	5.40168	6.6019e-08	4.38555e-06	0.00801767	DKO-WT
Gng5	Cxcl9+ cDC1s	846.811	0.460155	0.0867482	5.30449	1.1299e-07	7.33123e-06	0.0137161	DKO-WT
Got1	Cxcl9+ cDC1s	165.079	0.842259	0.159264	5.28845	1.23356e-07	7.91177e-06	0.0149728	DKO-WT
Canx	Cxcl9+ cDC1s	404.074	0.661579	0.126731	5.22033	1.78605e-07	1.13252e-05	0.0216701	DKO-WT
Cd81	Cxcl9+ cDC1s	818.051	0.494398	0.0957703	5.16233	2.43894e-07	1.52084e-05	0.0295817	DKO-WT
Atp6v0c	Cxcl9+ cDC1s	744.184	0.487094	0.0946216	5.14781	2.63551e-07	1.61606e-05	0.0319646	DKO-WT
Aldh18a1	Cxcl9+ cDC1s	43.1848	1.63752	0.322218	5.08203	3.73421e-07	2.24053e-05	0.0452724	DKO-WT
Rcc2	Cxcl9+ cDC1s	176.592	0.784599	0.155053	5.06021	4.18804e-07	2.45992e-05	0.050767	DKO-WT
Pdia4	Cxcl9+ cDC1s	135.535	0.896721	0.180201	4.97621	6.48396e-07	3.62658e-05	0.0785662	DKO-WT
Eif5	Cxcl9+ cDC1s	521.365	0.508935	0.102283	4.97576	6.49925e-07	3.62658e-05	0.0787507	DKO-WT
Gpr141	Cxcl9+ cDC1s	116.522	1.08149	0.224029	4.82746	1.38288e-06	7.1449e-05	0.167399	DKO-WT
Ly6a	Cxcl9+ cDC1s	237.993	0.870168	0.180951	4.80887	1.51788e-06	7.77045e-05	0.183723	DKO-WT
Ifrd1	Cxcl9+ cDC1s	352.509	0.618431	0.129524	4.77463	1.80035e-06	9.13268e-05	0.217869	DKO-WT
Leprotl1	Cxcl9+ cDC1s	247.919	0.603453	0.131926	4.57417	4.78118e-06	0.000224193	0.577758	DKO-WT
Bax	Cxcl9+ cDC1s	477.73	0.46477	0.104951	4.42845	9.4913e-06	0.000425836	1	DKO-WT
Mars	Cxcl9+ cDC1s	62.9044	1.10716	0.252118	4.39143	1.12609e-05	0.000498698	1	DKO-WT
Nktr	Cxcl9+ cDC1s	319.423	0.524047	0.119716	4.3774	1.20101e-05	0.000523567	1	DKO-WT
Txnip	Cxcl9+ cDC1s	84.6171	1.00798	0.232176	4.34143	1.41558e-05	0.000607609	1	DKO-WT
Snhg1	Cxcl9+ cDC1s	229.001	0.616683	0.142203	4.33664	1.44676e-05	0.000616256	1	DKO-WT
Nfe2l2	Cxcl9+ cDC1s	381.86	0.503071	0.117851	4.2687	1.96612e-05	0.00080269	1	DKO-WT
Slc25a33	Cxcl9+ cDC1s	81.8212	0.976345	0.22875	4.26818	1.97076e-05	0.00080269	1	DKO-WT
Pold4	Cxcl9+ cDC1s	370.5	0.485344	0.113661	4.27012	1.95372e-05	0.00080269	1	DKO-WT
Ubald2	Cxcl9+ cDC1s	299.129	0.536691	0.132319	4.05604	4.99127e-05	0.00186922	1	DKO-WT
Lamp1	Cxcl9+ cDC1s	131.881	0.708491	0.174764	4.05399	5.03522e-05	0.0018731	1	DKO-WT
Atp6v0b	Cxcl9+ cDC1s	508.35	0.407901	0.100911	4.0422	5.29525e-05	0.00194391	1	DKO-WT
Serinc3	Cxcl9+ cDC1s	339.343	0.626278	0.157402	3.97885	6.92495e-05	0.00249298	1	DKO-WT
Isyna1	Cxcl9+ cDC1s	187.082	0.615382	0.155737	3.95141	7.76927e-05	0.00272903	1	DKO-WT
Gnl3	Cxcl9+ cDC1s	156.227	0.657136	0.16655	3.94557	7.96103e-05	0.00275916	1	DKO-WT
Zfas1	Cxcl9+ cDC1s	224.985	0.544274	0.138868	3.91935	8.87866e-05	0.0030026	1	DKO-WT
AI662270	Cxcl9+ cDC1s	384.064	0.425511	0.110296	3.85789	0.00011437	0.00377623	1	DKO-WT
Snhg6	Cxcl9+ cDC1s	167.923	0.627224	0.16291	3.85012	0.000118059	0.00387511	1	DKO-WT
Tent5c	Cxcl9+ cDC1s	526.754	0.473127	0.123903	3.81852	0.000134254	0.00428078	1	DKO-WT
Aldoa	Cxcl9+ cDC1s	390.805	0.423376	0.111225	3.80649	0.000140952	0.00446881	1	DKO-WT
Pdxk	Cxcl9+ cDC1s	58.1257	0.99561	0.264073	3.77021	0.000163108	0.00505635	1	DKO-WT
Sept11	Cxcl9+ cDC1s	63.9198	0.937601	0.250734	3.73943	0.000184441	0.00550363	1	DKO-WT
Egr1	Cxcl9+ cDC1s	918.625	0.417272	0.11298	3.69334	0.000221331	0.00643242	1	DKO-WT
Slc1a5	Cxcl9+ cDC1s	107.868	0.721085	0.197654	3.64823	0.000264054	0.00759496	1	DKO-WT
Ltb	Cxcl9+ cDC1s	98.8544	0.74603	0.208037	3.58604	0.000335737	0.00936707	1	DKO-WT
Cyb5r1	Cxcl9+ cDC1s	80.4899	0.822354	0.232514	3.53679	0.000405027	0.0108136	1	DKO-WT
Sarnp	Cxcl9+ cDC1s	315.402	0.4234	0.120516	3.51324	0.000442673	0.0117625	1	DKO-WT
Hax1	Cxcl9+ cDC1s	105.196	0.685232	0.19541	3.50664	0.000453797	0.0119717	1	DKO-WT
Mafg	Cxcl9+ cDC1s	52.5792	0.958291	0.273786	3.50015	0.000464992	0.0121314	1	DKO-WT
Fkbp2	Cxcl9+ cDC1s	233.381	0.503992	0.14422	3.4946	0.000474774	0.012265	1	DKO-WT
Atp2a2	Cxcl9+ cDC1s	147.996	0.572856	0.165298	3.46559	0.000529068	0.0133584	1	DKO-WT
Klf13	Cxcl9+ cDC1s	89.3025	0.75148	0.218129	3.44512	0.000570799	0.0141558	1	DKO-WT
Mif	Cxcl9+ cDC1s	396.903	0.400355	0.117716	3.40102	0.000671356	0.0163588	1	DKO-WT
Ccng1	Cxcl9+ cDC1s	96.0498	0.693883	0.205803	3.37159	0.000747363	0.0176707	1	DKO-WT
Jdp2	Cxcl9+ cDC1s	252.067	1.11354	0.334186	3.3321	0.000861945	0.0201241	1	DKO-WT
Tmem123	Cxcl9+ cDC1s	94.9421	0.684589	0.209359	3.26993	0.00107574	0.0244008	1	DKO-WT
Irf2bp2	Cxcl9+ cDC1s	229.642	0.445824	0.139084	3.20542	0.00134863	0.029396	1	DKO-WT
Hpgd	Cxcl9+ cDC1s	33.9548	1.09386	0.344598	3.1743	0.001502	0.0318349	1	DKO-WT
Rasa2	Cxcl9+ cDC1s	41.5995	0.968579	0.309571	3.12878	0.00175535	0.0361434	1	DKO-WT
Nfe2l1	Cxcl9+ cDC1s	78.6162	0.743442	0.241028	3.08447	0.00203916	0.0409299	1	DKO-WT
Gsto1	Cxcl9+ cDC1s	138.978	0.540117	0.176242	3.06463	0.00217939	0.0431241	1	DKO-WT
Stx3	Cxcl9+ cDC1s	64.3121	0.799305	0.262027	3.05047	0.00228482	0.0442684	1	DKO-WT
Rnf130	Cxcl9+ cDC1s	128.109	0.529863	0.175517	3.01887	0.00253719	0.0481549	1	DKO-WT

[truncated: 4 more sheets: Early mature cDC1s_DOWN, Early mature cDC1s_UP, Late mature cDC1s_DOWN, Late mature cDC1s_UP]
