# Supplementary material for: The unfolded protein sensor IRE1a is essential for homeostatic dendritic cell maturation
Source: Research Square preprint supplement (doi:10.21203/rs.3.rs-4763670/v1), 2024-08-06
Supplement: Supplementary file 5 [file 7d76515581a34ab51812da96.xlsx]

## Sheet: angle_0-1
pval	angle	n	gsetid	z	qval	name
1.84869e-06	0.888655	36	GO:0016126	0.238876	0.0011086	sterol biosynthetic process
1.28e-05	0.648578	76	GO:0006694	0.131306	0.00438612	steroid biosynthetic process
5.03241e-05	0.103507	45	GO:1903725	0.139035	0.0112093	regulation of phospholipid metabolic process
4.89448e-05	0.690688	31	GO:0006695	0.202564	0.0112093	cholesterol biosynthetic process
4.89448e-05	0.690688	31	GO:1902653	0.202564	0.0112093	secondary alcohol biosynthetic process
8.29786e-05	0.0199624	18	GO:0090218	0.232688	0.0154526	positive regulation of lipid kinase activity
0.000125801	0.16271	18	GO:0046426	0.224346	0.0184748	negative regulation of JAK-STAT cascade
0.000125801	0.16271	18	GO:1904893	0.224346	0.0184748	negative regulation of STAT cascade
0.000167353	0.133343	25	GO:1903727	0.191901	0.0208085	positive regulation of phospholipid metabolic process
0.000267411	0.208008	39	GO:0050810	0.142568	0.0263601	regulation of steroid biosynthetic process
0.000272192	0.927096	203	GO:0009100	0.0991429	0.0264688	glycoprotein metabolic process
0.000442546	0.820077	9	GO:0006026	0.329088	0.0370298	aminoglycan catabolic process
0.000451649	0.968204	142	GO:0008202	0.0950107	0.0372524	steroid metabolic process
0.00048302	0.856084	88	GO:0042157	0.0988569	0.0381739	lipoprotein metabolic process
0.000735674	0.675633	43	GO:0030203	0.136568	0.048568	glycosaminoglycan metabolic process

## Sheet: angle_1-2
pval	angle	n	gsetid	z	qval	name
0	1.01298	73	GO:1902652	0.158261	0	secondary alcohol metabolic process
0	1.01298	72	GO:0008203	0.160459	0	cholesterol metabolic process
0	1.09011	78	GO:0016125	0.168891	0	sterol metabolic process
0	1.2162	44	GO:0055092	0.197072	0	sterol homeostasis
0	1.2162	43	GO:0042632	0.201655	0	cholesterol homeostasis
1.04477e-05	1.26197	53	GO:0045454	0.16385	0.00383036	cell redox homeostasis
3.06008e-05	1.5018	72	GO:0055088	0.128436	0.00903855	lipid homeostasis
4.71996e-05	1.94403	83	GO:0006986	0.109562	0.0112093	response to unfolded protein
8.58956e-05	1.90928	101	GO:0035966	0.0993756	0.0154526	response to topologically incorrect protein
0.000188645	1.85579	178	GO:0034976	0.0937282	0.0215475	response to endoplasmic reticulum stress
0.000416556	1.03496	128	GO:0006486	0.0957419	0.035685	protein glycosylation
0.000416556	1.03496	128	GO:0043413	0.0957419	0.035685	macromolecule glycosylation
0.000415078	1.71175	35	GO:0033013	0.153942	0.035685	tetrapyrrole metabolic process
0.000760035	1.03496	134	GO:0070085	0.091455	0.0492722	glycosylation

## Sheet: angle_2-3
pval	angle	n	gsetid	z	qval	name
0	2.74054	45	GO:0043038	0.241861	0	amino acid activation
0	2.74054	44	GO:0043039	0.247358	0	tRNA aminoacylation
0	2.74054	41	GO:0006418	0.265458	0	tRNA aminoacylation for protein translation
2.76346e-07	2.56611	22	GO:0036003	0.256296	0.000180781	positive regulation of transcription from RNA polymerase II promoter in response to stress
2.22806e-06	2.63567	42	GO:0008652	0.172592	0.00114522	cellular amino acid biosynthetic process
2.22806e-06	2.63567	42	GO:1901607	0.172592	0.00114522	alpha-amino acid biosynthetic process
3.43135e-06	2.18642	48	GO:0070059	0.154802	0.00164613	intrinsic apoptotic signaling pathway in response to endoplasmic reticulum stress
9.05723e-06	2.44578	6	GO:0006563	0.661769	0.00362088	L-serine metabolic process
1.06458e-05	2.61191	171	GO:0006520	0.103556	0.00383036	cellular amino acid metabolic process
3.51694e-05	2.6376	18	GO:1901522	0.228779	0.00903855	positive regulation of transcription from RNA polymerase II promoter involved in cellular response to chemical stimulus
9.72977e-05	2.40582	19	GO:0006760	0.219416	0.016958	folic acid-containing compound metabolic process
0.000125796	2.26291	75	GO:0035967	0.10103	0.0184748	cellular response to topologically incorrect protein
0.000129345	2.3546	58	GO:0034620	0.117676	0.0186153	cellular response to unfolded protein
0.000167718	2.40582	16	GO:0046653	0.260557	0.0208085	tetrahydrofolate metabolic process
0.000159267	2.44578	12	GO:0009070	0.330884	0.0208085	serine family amino acid biosynthetic process
0.000166237	2.89675	8	GO:1902036	0.345129	0.0208085	regulation of hematopoietic stem cell differentiation
0.000222235	2.40582	23	GO:0042558	0.181257	0.0238687	pteridine-containing compound metabolic process
0.00023807	2.29334	10	GO:1990440	0.321873	0.0251934	positive regulation of transcription from RNA polymerase II promoter in response to endoplasmic reticulum stress
0.000383381	2.40582	17	GO:0006730	0.24523	0.0353693	one-carbon metabolic process
0.000493354	2.88042	76	GO:0043534	0.0883998	0.0381739	blood vessel endothelial cell migration
0.000493118	2.86064	9	GO:0043619	0.297747	0.0381739	regulation of transcription from RNA polymerase II promoter in response to oxidative stress
0.000585391	2.57831	27	GO:0051898	0.164218	0.0429844	negative regulation of protein kinase B signaling
0.000628389	2.63028	34	GO:0042149	0.136118	0.0452189	cellular response to glucose starvation
0.000717197	2.05516	42	GO:0042440	0.130943	0.0482332	pigment metabolic process
0.000713634	2.80246	5	GO:0034616	0.426073	0.0482332	response to laminar fluid shear stress
0.000713634	2.80246	5	GO:0071499	0.426073	0.0482332	cellular response to laminar fluid shear stress

## Sheet: angle_3-4
pval	angle	n	gsetid	z	qval	name
8.0302e-05	3.88374	46	GO:0032922	0.136522	0.0154526	circadian regulation of gene expression
0.000105259	3.35699	35	GO:0002042	0.156511	0.0176149	cell migration involved in sprouting angiogenesis
0.000206732	3.01379	21	GO:0010573	0.2099	0.0228246	vascular endothelial growth factor production
0.000206732	3.01379	21	GO:0010574	0.2099	0.0228246	regulation of vascular endothelial growth factor production
0.000313359	3.96019	6	GO:0061469	0.491339	0.0300658	regulation of type B pancreatic cell proliferation
0.000407177	3.06245	10	GO:0048532	0.300411	0.035685	anatomical structure arrangement
0.00046532	3.06916	44	GO:0043618	0.122974	0.037623	regulation of transcription from RNA polymerase II promoter in response to stress
0.000489593	3.06916	48	GO:0043620	0.112726	0.0381739	regulation of DNA-templated transcription in response to stress

## Sheet: angle_4-5
pval	angle	n	gsetid	z	qval	name
9.79369e-09	4.44215	60	GO:0032612	0.121341	7.8306e-06	interleukin-1 production
6.61706e-08	4.40559	39	GO:0032651	0.148507	4.76163e-05	regulation of interleukin-1 beta production
3.70576e-06	4.52652	51	GO:0032652	0.126762	0.00166666	regulation of interleukin-1 production
5.37465e-06	4.57696	11	GO:0032691	0.354273	0.00227506	negative regulation of interleukin-1 beta production
2.38835e-05	4.32848	47	GO:0032611	0.141905	0.00747241	interleukin-1 beta production
3.38552e-05	4.99085	34	GO:1990868	0.170027	0.00903855	response to chemokine
3.38552e-05	4.99085	34	GO:1990869	0.170027	0.00903855	cellular response to chemokine
5.14047e-05	4.36	73	GO:0038061	0.0933736	0.0112093	NIK/NF-kappaB signaling
5.36577e-05	4.71843	17	GO:0032692	0.276094	0.0113565	negative regulation of interleukin-1 production
6.92139e-05	4.56277	13	GO:0061158	0.273168	0.0142304	3'-UTR-mediated mRNA destabilization
8.50971e-05	4.68601	100	GO:1903707	0.078369	0.0154526	negative regulation of hemopoiesis
0.000110709	4.37588	8	GO:0050711	0.311448	0.0177036	negative regulation of interleukin-1 secretion
0.000137913	4.31899	33	GO:0051591	0.138997	0.0193311	response to cAMP
0.000163763	4.42442	15	GO:1900151	0.247583	0.0208085	regulation of nuclear-transcribed mRNA catabolic process, deadenylation-dependent decay
0.000163763	4.42442	15	GO:1900153	0.247583	0.0208085	positive regulation of nuclear-transcribed mRNA catabolic process, deadenylation-dependent decay
0.000185417	4.37588	5	GO:0050713	0.498318	0.0215203	negative regulation of interleukin-1 beta secretion
0.000209342	4.26601	24	GO:0048662	0.169653	0.0228246	negative regulation of smooth muscle cell proliferation
0.000248622	4.60393	122	GO:0071222	0.07086	0.025543	cellular response to lipopolysaccharide
0.000255572	4.40364	127	GO:0033002	0.0711379	0.025543	muscle cell proliferation
0.000254254	4.46934	100	GO:0048659	0.0711644	0.025543	smooth muscle cell proliferation
0.000252901	4.46934	99	GO:0048660	0.0718832	0.025543	regulation of smooth muscle cell proliferation
0.0003207	4.20913	68	GO:1901222	0.0850594	0.0303652	regulation of NIK/NF-kappaB signaling
0.000360505	4.96514	101	GO:0051250	0.0721315	0.0336908	negative regulation of lymphocyte activation
0.000390113	4.17015	36	GO:0038066	0.127947	0.0355348	p38MAPK cascade
0.000455561	4.9786	68	GO:1902106	0.0867696	0.0372524	negative regulation of leukocyte differentiation
0.00051932	4.60393	129	GO:0071219	0.0670149	0.0393371	cellular response to molecule of bacterial origin
0.000626189	4.37392	56	GO:0043525	0.0952499	0.0452189	positive regulation of neuron apoptotic process
0.000663613	4.52651	39	GO:0061014	0.115004	0.0459169	positive regulation of mRNA catabolic process
0.000646453	4.1302	14	GO:0034114	0.209045	0.0459169	regulation of heterotypic cell-cell adhesion
0.000726439	4.94044	86	GO:1903038	0.0743261	0.0484024	negative regulation of leukocyte cell-cell adhesion
0.000750978	4.39866	36	GO:0050710	0.118834	0.0491276	negative regulation of cytokine secretion

## Sheet: angle_5-6
pval	angle	n	gsetid	z	qval	name
2.07512e-05	5.596	81	GO:0050728	0.104231	0.00678752	negative regulation of inflammatory response
3.40477e-05	5.38673	76	GO:0046634	0.10446	0.00903855	regulation of alpha-beta T cell activation
8.07269e-05	5.64371	21	GO:0002507	0.23387	0.0154526	tolerance induction
9.89765e-05	5.13106	41	GO:0031663	0.141711	0.016958	lipopolysaccharide-mediated signaling pathway
0.000110063	5.32081	66	GO:0045639	0.102085	0.0177036	positive regulation of myeloid cell differentiation
0.000116287	5.44111	31	GO:0046636	0.174209	0.0181914	negative regulation of alpha-beta T cell activation
0.000139691	5.08479	78	GO:0050868	0.0861386	0.0193311	negative regulation of T cell activation
0.000179907	5.57975	71	GO:0007272	0.100383	0.0212231	ensheathment of neurons
0.000179907	5.57975	71	GO:0008366	0.100383	0.0212231	axon ensheathment
0.000179907	5.57975	71	GO:0042552	0.100383	0.0212231	myelination
0.000398089	5.20108	116	GO:0002695	0.0740296	0.035685	negative regulation of leukocyte activation
0.000432924	5.90459	9	GO:0045625	0.302113	0.0366508	regulation of T-helper 1 cell differentiation
0.000513204	5.33873	63	GO:0043367	0.091156	0.0392874	CD4-positive, alpha-beta T cell differentiation
0.000539823	5.80959	9	GO:0002315	0.298769	0.0404643	marginal zone B cell differentiation
0.000662035	5.88315	16	GO:0045063	0.232293	0.0459169	T-helper 1 cell differentiation
0.000769407	5.23427	6	GO:0016338	0.445634	0.0494344	calcium-independent cell-cell adhesion via plasma membrane cell-adhesion molecules

## Sheet: angle_6-6.28
pval	angle	n	gsetid	z	qval	name
0.000576118	6.0737	16	GO:0043552	0.235899	0.0427396	positive regulation of phosphatidylinositol 3-kinase activity
0.000662995	6.04845	5	GO:0043031	0.454406	0.0459169	negative regulation of macrophage activation
